# Supplementary material for: Access to luminescent mesophases of chiral gold(i) complexes by thermal or mechanic stimuli: the role of the tertiary carbon
Source: Royal Society of Chemistry journal article supplement (doi:10.1039/d1tc04325k), 2021-12-10
Supplement: d1tc04325k1.pdf [file d1tc04325k1.pdf]

## Electronic Supporting Information for

### Access to luminescent mesophases of gold(I) chiral complexes by thermal or mechanic stimuli. The role of the tertiary carbon

*María Barcenilla,<sup>a</sup> César L. Folcia,<sup>b</sup> Josu Ortega,<sup>b</sup> Jesús Etxebarria,<sup>b</sup> Silverio Coco,<sup>\*a</sup> and Pablo Espinet.<sup>\*a</sup>*

<sup>a</sup> IU CINQUIMA/Química Inorgánica, Facultad de Ciencias, Universidad de Valladolid, 47071 Valladolid, Castilla y León, Spain. Department of Physics, University of the Basque Country, UPV/EHU, 48080 Bilbao, Spain.

\* E-mail addresses: silverio.coco@uva.es; espinet@qi.uva.es

## Table of Contents

|                                                  |                 |
|--------------------------------------------------|-----------------|
| <b>Experimental section</b>                      | <b>Page S2</b>  |
| <b><sup>1</sup>H NMR spectra</b>                 | <b>Page S10</b> |
| <b><sup>13</sup>C{<sup>1</sup>H} NMR spectra</b> | <b>Page S16</b> |
| <b><sup>19</sup>F NMR spectra</b>                | <b>Page S21</b> |
| <b>MALDI-TOF mass spectra</b>                    | <b>Page S25</b> |
| <b>POM textures</b>                              | <b>Page S31</b> |
| <b>DSC scans</b>                                 | <b>Page S34</b> |
| <b>UV-Visible and luminescence data</b>          | <b>Page S38</b> |
| <b>X-ray diffraction diagrams</b>                | <b>Page S51</b> |
| <b>References</b>                                | <b>Page S53</b> |

## EXPERIMENTAL SECTION

**General Considerations.** General procedures are as reported before.<sup>1</sup> Elemental analyses were performed by the “Servicio de análisis elemental, CACTI, Universidad de Vigo”. IR spectra were recorded on a Perkin-Elmer Frontier spectrometer coupled to a Pike GladiATR-210 accessory. NMR spectra were recorded on Varian 500 instruments in CDCl<sub>3</sub>. MALDI-TOF MS was performed using a Bruker Daltonics autoflex speed instrument equipped with nitrogen laser (340 nm). Positive-ion mode spectra were recorded using the reflective mode. The accelerating voltage was 19 kV. The analytical sample was obtained by mixing the dichloromethane or tetrahydrofuran solution of the sample (1 mg/mL) and a solution of the matrix in the same solvent (DCTB, 10 mg/mL) in a 1/5 (vol/vol) ratio. The prepared solution of the sample and the matrix (0.5  $\mu$ L) was loaded on the MALDI plate and allowed to dry at 23°C before the plate was inserted into the vacuum chamber of the MALDI instrument. UV/Vis absorption spectra were obtained by means of a Shimadzu UV-2550 spectrophotometer, in dichloromethane ( $\sim 1 \times 10^{-5}$  M).

Luminescence spectra were recorded with a Perkin-Elmer LS-55 spectrofluorimeter. Emission and excitation spectra at 298 K were measured in deoxygenated CH<sub>2</sub>Cl<sub>2</sub> solutions in quartz tubes and in the mesophase by means of a remote fiber optic accessory with the sample placed between two quartz plates, and the Mettler FP-82HT hot stage. The emission spectrum of the ground phase was recorded at 298 K by means of the remote fiber optic probe, at the same time that the sample was being crushed on a quartz plate. Lifetime measurements in solution were carried out on a Edinburgh instrument (FLS980 spectrometer) at the LTI services of the University of Burgos. In mesophase, lifetime measurements were recorded on a Jobin-Yvon Horiba Fluorolog 3-22 Tau-3 spectrofluorimeter at the University of La Rioja.

Microscopy studies were carried out on a Leica DMRB microscope equipped with a Mettler FP82HT hot stage and a Mettler FP90 central processor, at a heating rate of 10 °C min<sup>-1</sup>. DSC was

performed using a DSC Q20 from TA Instruments with samples (2–5 mg) sealed in aluminum pans and a scanning rate of 10 °C/min under a nitrogen atmosphere.

Specific rotations were measured using a Perkin-Elmer 343 polarimeter at 589 nm.

The X-ray diffraction diagrams were recorded using a Stoe Stadivari goniometer equipped with a Genix3D microfocus generator (Xenocs) and a Dectris Pilatus 100K detector. Temperature control was achieved using a nitrogen-gas Cryostream controller (Oxford Cryosystems) allowing for a temperature control of about 0.1 °C. Lindemann capillaries of diameter 0.6  $\mu\text{m}$  were utilized. The exposure time was 2 minutes and the samples were continuously rotated during the measurements to reduce texture effects. Monochromatic Cu-K $\alpha$  radiation ( $\lambda = 1.5418 \text{ \AA}$ ) was used.

Literature methods were used to prepare  $[\text{CNC}_6\text{H}_4\text{O}(\text{O})\text{CC}_6\text{H}_4\text{OC}_n\text{H}_{2n+1}\text{-}p]$  ( $n = 6, 8, 10$ ),<sup>1,2</sup> and  $[\text{AuCl}(\text{tht})]$  (tht = tetrahydrothiophene).<sup>3</sup> The new chiral isocyanide ligand was prepared from the chiral nitro precursor, as reported for similar isocyanides.<sup>4</sup>

The chiral chain was introduced in the corresponding phenol derivatives, using the Mitsunobu reaction with (S)-2-octanol (Aldrich), triphenylphosphine, and diethyl azodicarboxylate to give the (R)-2-octyl derivative.<sup>5</sup>

Only example procedures are described, as the syntheses were similar for the rest of the compounds. Yields, IR, and analytical data are given for all the gold complexes.

### **Preparation of (R)-1-(2-octyloxy)-2,3,5,6-tetrafluorobenzene**

Diethyl azodicarboxylate (0.83 g, 5 mmol) were added slowly to a solution of 2,3,5,6-tetrafluorophenol (0.83 g, 5 mmol) and triphenylphosphine (1.64 g, 6.2 mmol) in 50 mL of tetrahydrofuran, with stirring and under nitrogen atmosphere. A solution of (S)-2-octanol (0.8 mL, 6.2 mmol) in 10 mL of tetrahydrofuran was then added dropwise. After reacting for 20 h at room temperature, the reaction mixture was evaporated to dryness. The residue was chromatographed (silica gel, hexane as eluent) and the hexane was evaporated to obtain the product as a colorless

liquid. Yield: 0.9 g, 65 %.  $^1\text{H}$  NMR ( $\text{CDCl}_3$ , 500 MHz):  $\delta_1$  6.76 (m, 1H, Ar),  $\delta_2$  4.39 (m, 1H, CH),  $\delta_3$  1.69 (m, 2H, O-CH-CH<sub>2</sub>),  $\delta_4$  1.44 (m, 2H, O-CH-CH<sub>2</sub>-CH<sub>2</sub>),  $\delta_5$  1.30 (m, 6H, CH<sub>2</sub>),  $\delta_6$  1.30 (d, 3H, CH-CH<sub>3</sub>,  $J$  = 6.16 Hz),  $\delta_7$  0.89 (t, 3H, CH<sub>3</sub>,  $J$  = 6.99 Hz).  $^{19}\text{F}$  NMR ( $\text{CDCl}_3$ ):  $\delta_1$  -140.48 (m, F<sub>ortho</sub>),  $\delta_2$  -156.06 (m, F<sub>meta</sub>).  $^{13}\text{C}$   $\{^1\text{H}\}$  NMR ( $\text{CDCl}_3$ , 126 MHz): 146.25 (dm, F<sub>ortho</sub>-C<sub>Ar</sub>,  $^1J_{\text{C-F}}$  = 246 Hz), 141.69 (dm, F<sub>meta</sub>-C<sub>Ar</sub>,  $^1J_{\text{C-F}}$  = 246 Hz), 137.37 (tt, C<sub>Ar</sub>-OCH<sub>2</sub>,  $^2J_{\text{C-F}}$  = 12 Hz,  $^3J_{\text{C-F}}$  = 4 Hz), 99.28 (t, H-C<sub>Ar</sub>,  $^2J_{\text{C-F}}$  = 23 Hz), 81.90 (CH), 36.73, 31.70, 29.15, 25.13, 22.51 (CH<sub>2</sub>), 19.91 (CH-CH<sub>3</sub>), 13.91 (CH<sub>3</sub>).  $[\alpha]_{589}^{25}$  ( $\text{CHCl}_3$ ) : 14.0 deg cm<sup>2</sup> g<sup>-1</sup>.

### Preparation of 4-Isocyanophenyl 4-((R)-2-octyloxybenzoate)

To a solution of 4-{4-((R)-2-octyloxybenzoyloxy)N-phenyl}formamide (1.40 g, 3.79 mmol), prepared by reaction of the amine with formic acid, and triethylamine (1.06 mL, 7.58 mmol) in 50 ml of  $\text{CH}_2\text{Cl}_2$  was added dropwise a solution of triphosgene (0.38 g, 1.26 mmol) in 5 ml of  $\text{CH}_2\text{Cl}_2$  under nitrogen. The mixture was stirred for 1h and then the solvent was removed on a rotary evaporator. The resulting residue was chromatographed (silica gel,  $\text{CH}_2\text{Cl}_2$ /hexane, 1:1 as eluent) and the solvent was evaporated to obtain the product as a cream solid. Yield: 1.1 g, 82 %.  $^1\text{H}$  NMR ( $\text{CDCl}_3$ , 500 MHz):  $\delta_1$  8.09 (d, 2H, O(O)C-Ar, AA' part of AA'XX' spin system,  $N = J_{\text{AX}} + J_{\text{AX}'} = 8.88$  Hz,  $J_{\text{AA}'} \approx J_{\text{XX}'}), \delta_2$  7.42 (d, 2H, CN-Ar, AA' part of AA'XX' spin system,  $N = J_{\text{AX}} + J_{\text{AX}'} = 8.84$  Hz,  $J_{\text{AA}'} \approx J_{\text{XX}'}), \delta_3$  7.22 (d, 2H, CN-Ar, XX' part of AA'XX' spin system,  $N = J_{\text{AX}} + J_{\text{AX}'} = 8.84$  Hz,  $J_{\text{AA}'} \approx J_{\text{XX}'}), \delta_4$  6.94 (d, 2H, O(O)C-Ar, XX' part of AA'XX' spin system,  $N = J_{\text{AX}} + J_{\text{AX}'} = 8.88$  Hz,  $J_{\text{AA}'} \approx J_{\text{XX}'}), \delta_5$  4.47 (m, 1H, CH),  $\delta_6$  1.68 (m, 2H, O-CH-CH<sub>2</sub>),  $\delta_7$  1.50-1.20 (m, 8H, CH<sub>2</sub>),  $\delta_8$  1.33 (d, 3H, CH-CH<sub>3</sub>,  $J$  = 6.13 Hz),  $\delta_9$  0.87 (t, 3H, CH<sub>3</sub>,  $J$  = 6.76 Hz).  $^{13}\text{C}$   $\{^1\text{H}\}$  NMR ( $\text{CDCl}_3$ , 126 MHz): 164.39 ( $\text{C}\equiv\text{N}$ ), 164.29 ( $\text{C}=\text{O}$ ), 163.10 ( $\text{C}_{\text{Ar}}-\text{O}$ ), 151.33 ( $\text{C}_{\text{Ar}}-\text{O}-\text{C}(\text{O})$ ), 132.42, 127.56 ( $\text{C}_{\text{Ar}}-\text{H}$ ), 123.89 ( $\text{C}\equiv\text{N}-\text{C}_{\text{Ar}}$ ), 123.03 ( $\text{C}_{\text{Ar}}-\text{H}$ ), 120.36 ( $\text{O}(\text{O})\text{C}-\text{C}_{\text{Ar}}$ ), 115.28 ( $\text{C}_{\text{Ar}}-\text{H}$ ), 74.21 (Ar-O-CH), 36.25 (CH-CH<sub>2</sub>), 31.73, 29.18, 25.38, 22.55 (CH<sub>2</sub>), 19.55 (CH-CH<sub>3</sub>), 14.04 (CH<sub>2</sub>-CH<sub>3</sub>). IR (cm<sup>-1</sup>):  $\nu(\text{C}\equiv\text{N})$ : 2122;  $\nu(\text{C}=\text{O})$ : 1733. Anal. calcd (%) for  $\text{C}_{22}\text{H}_{25}\text{NO}_3$ : C, 75.19; H, 7.17; N, 3.99. Found: C, 74.99; H, 7.32; N, 3.92. MALDI-TOF MS:  $m/z$  352.1921  $[\text{M}+\text{H}]^+$  (calcd 352.1907 for  $\text{C}_{22}\text{H}_{26}\text{NO}_3$ ).  $[\alpha]_{589}^{25}$  ( $\text{CHCl}_3$ ): 12.0 deg cm<sup>2</sup> g<sup>-1</sup>.

**Preparation of [Au(C<sub>6</sub>F<sub>4</sub>OR<sup>1</sup>)(C≡NC<sub>6</sub>H<sub>4</sub>O(O)CC<sub>6</sub>H<sub>4</sub>OR<sup>2</sup>)] (R<sup>1</sup> = C<sub>6</sub>H<sub>13</sub>, C<sub>8</sub>H<sub>17</sub>, C<sub>10</sub>H<sub>21</sub>, (R)-2-Octyl; R<sup>2</sup> = C<sub>6</sub>H<sub>13</sub>, C<sub>8</sub>H<sub>17</sub>, C<sub>10</sub>H<sub>21</sub>, (R)-2-Octyl)**

To a solution of HC<sub>6</sub>F<sub>4</sub>OR<sup>1</sup> (0.312 mmol) in 25 mL of dried diethyl ether was added a solution of n-butyllithium 1.6 M in hexane (0.194 mL, 0.312 mmol) at -78 °C, under nitrogen. After stirring for one hour at -50 °C, solid [AuCl(tht)] (0.96 g, 0.312 mmol) was added at -78 °C and the reaction mixture was slowly brought to room temperature (3 h). Then, a few drops of water were added and the solution was filtered in air through anhydrous MgSO<sub>4</sub>. C≡NC<sub>6</sub>H<sub>4</sub>O(O)CC<sub>6</sub>H<sub>4</sub>OR<sup>2</sup> (0.312 mmol). was added to the solution obtained. After stirring for 15 min, the solvent was removed on a rotary evaporator and the white solid obtained was recrystallized from dichloromethane/hexane at -15 °C to give a white solid.

Yields, IR and analytical data are as follows:

**R<sup>1</sup> = (R)-2-Octyl, R<sup>2</sup> = C<sub>6</sub>H<sub>13</sub> (1).** Yield: 0.13 g, 52 %. <sup>1</sup>H NMR (CDCl<sub>3</sub>, 500 MHz): δ<sub>1</sub> 8.12 (d, 2H, O(O)C-Ar, AA' part of AA'XX' spin system,  $N = J_{AX} + J_{AX'} = 8.93$  Hz,  $J_{AA'} \approx J_{XX'}$ ), δ<sub>2</sub> 7.63 (d, 2H, CN-Ar, AA' part of AA'XX' spin system,  $N = J_{AX} + J_{AX'} = 8.83$  Hz,  $J_{AA'} \approx J_{XX'}$ ), δ<sub>3</sub> 7.40 (d, 2H, CN-Ar, XX' part of AA'XX' spin system,  $N = J_{AX} + J_{AX'} = 8.83$  Hz,  $J_{AA'} \approx J_{XX'}$ ), δ<sub>4</sub> 6.99 (d, 2H, O(O)C-Ar, XX' part of AA'XX' spin system,  $N = J_{AX} + J_{AX'} = 8.93$  Hz,  $J_{AA'} \approx J_{XX'}$ ), δ<sub>5</sub> 4.30 (m, 1H, CH), δ<sub>6</sub> 4.06 (t, 2H, O-CH<sub>2</sub>,  $J = 6.60$  Hz), δ<sub>7</sub> 1.80-1.27 (m, 18H, CH<sub>2</sub>), δ<sub>8</sub> 1.28 (d, 3H, CH-CH<sub>3</sub>,  $J = 6.11$  Hz), δ<sub>9</sub> 0.92 (t, 3H, CH<sub>3</sub>,  $J = 7.02$  Hz), δ<sub>10</sub> 0.89 (t, 3H, CH<sub>3</sub>,  $J = 6.71$  Hz). <sup>19</sup>F NMR (CDCl<sub>3</sub>, 470 MHz): δ<sub>1</sub> -117.85 (m, F<sub>ortho</sub>), δ<sub>2</sub> -155.94 (m, F<sub>meta</sub>). <sup>13</sup>C {<sup>1</sup>H} NMR (CDCl<sub>3</sub>, 126 MHz): 164.07 (C=O), 163.96 (O-C<sub>Ar</sub>), 158.26 (C≡N), 153.16 (C<sub>Ar</sub>-O-C(O)), 149.90 (dm, F<sub>ortho</sub>-C<sub>Ar</sub>,  $^1J_{C-F} = 228$  Hz), 141.36 (dm, F<sub>meta</sub>-C<sub>Ar</sub>,  $^1J_{C-F} = 248$  Hz), 134.71 (m, O-C<sub>Ar</sub>), 132.47, 128.07 (C<sub>Ar</sub>-H), 127.69 (m, C<sub>Ar</sub>-Au), 123.79 (C<sub>Ar</sub>-H), 121.51 (CN-C<sub>Ar</sub>), 120.23 (OC(O)-C<sub>Ar</sub>), 114.50 (C<sub>Ar</sub>-H), 81.27 (Ar-O-CH), 68.43 (CH<sub>2</sub>-O-Ar), 36.76 (CH-CH<sub>2</sub>), 31.76, 31.50, 29.24, 28.99, 25.61, 25.24, 22.57, 22.55 (CH<sub>2</sub>) 20.01 (CH-CH<sub>3</sub>), 14.05, 13.99 (CH<sub>2</sub>-CH<sub>3</sub>). IR (cm<sup>-1</sup>): ν(C≡N): 2216; ν(C=O): 1726. Anal. calcd (%) for C<sub>34</sub>H<sub>38</sub>AuF<sub>4</sub>NO<sub>4</sub>: C, 51.20; H, 4.80; N, 1.76. Found: C, 51.21; H, 4.56; N, 1.88.

MALDI-TOF MS:  $m/z$  798.2441  $[M+H]^+$  (calcd 798.2475 for  $C_{34}H_{39}AuF_4NO_4$ ).  $[\alpha]_{546}^{25}$  ( $CHCl_3$ ): 13.8 deg  $cm^2 g^{-1}$ .

**R<sup>1</sup> = (R)-2-Octyl, R<sup>2</sup> = C<sub>8</sub>H<sub>17</sub> (2).** Yield: 0.15 g, 58 %. <sup>1</sup>H NMR ( $CDCl_3$ , 500 MHz):  $\delta_1$  8.12 (d, 2H, O(O)C-Ar, AA' part of AA'XX' spin system,  $N = J_{AX} + J_{AX'} = 8.93$  Hz,  $J_{AA'} \approx J_{XX'}$ ),  $\delta_2$  7.63 (d, 2H, CN-Ar, AA' part of AA'XX' spin system,  $N = J_{AX} + J_{AX'} = 8.98$  Hz,  $J_{AA'} \approx J_{XX'}$ ),  $\delta_3$  7.40 (d, 2H, CN-Ar, XX' part of AA'XX' spin system,  $N = J_{AX} + J_{AX'} = 8.98$  Hz,  $J_{AA'} \approx J_{XX'}$ ),  $\delta_4$  6.99 (d, 2H, O(O)C-Ar, XX' part of AA'XX' spin system,  $N = J_{AX} + J_{AX'} = 8.93$  Hz,  $J_{AA'} \approx J_{XX'}$ ),  $\delta_5$  4.31 (m, 1H, CH),  $\delta_6$  4.05 (t, 2H, O-CH<sub>2</sub>,  $J = 6.51$  Hz),  $\delta_7$  1.80-1.20 (m, 22H, CH<sub>2</sub>),  $\delta_8$  1.28 (d, 3H, CH-CH<sub>3</sub>,  $J = 6.11$  Hz),  $\delta_9$  0.88 (t, 6H, CH<sub>3</sub>,  $J = 6.90$  Hz). <sup>19</sup>F NMR ( $CDCl_3$ , 470 MHz):  $\delta_1$  -117.83 (m, *F<sub>ortho</sub>*),  $\delta_2$  -155.94 (m, *F<sub>meta</sub>*). <sup>13</sup>C {<sup>1</sup>H} NMR ( $CDCl_3$ , 126 MHz): 164.07 (C=O), 163.95 (O-C<sub>Ar</sub>), 158.28 (C≡N), 153.16 (C<sub>Ar</sub>-O-C(O)), 149.40 (dm, *F<sub>ortho</sub>*-C<sub>Ar</sub>,  $^1J_{C-F} = 228$  Hz), 141.38 (dm, *F<sub>meta</sub>*-C<sub>Ar</sub>,  $^1J_{C-F} = 248$  Hz), 134.71 (m, O-C<sub>Ar</sub>), 132.47, 128.07 (C<sub>Ar</sub>-H), 127.69 (m, C<sub>Ar</sub>-Au), 123.79 (C<sub>Ar</sub>-H), 121.51 (CN-C<sub>Ar</sub>), 120.23 (O(O)C-C<sub>Ar</sub>), 114.50 (C<sub>Ar</sub>-H), 81.27 (Ar-O-CH), 68.43 (CH<sub>2</sub>-O-Ar), 36.76 (CH-CH<sub>2</sub>), 31.77, 29.29, 29.24, 29.18, 29.03, 25.94, 25.25, 22.62, 22.57 (CH<sub>2</sub>), 20.01 (CH-CH<sub>3</sub>), 14.07, 14.05 (CH<sub>2</sub>-CH<sub>3</sub>). IR ( $cm^{-1}$ ):  $\nu(C\equiv N)$ : 2214;  $\nu(C=O)$ : 1726. Anal. calcd (%) for  $C_{36}H_{42}AuF_4NO_4$ : C, 52.37; H, 5.13; N, 1.70. Found: C, 52.46; H, 5.08; N, 1.82. MALDI-TOF MS:  $m/z$  826.2760  $[M+H]^+$  (calcd 826.2788 for  $C_{36}H_{43}AuF_4NO_4$ ).  $[\alpha]_{546}^{25}$  ( $CHCl_3$ ): 7.5 deg  $cm^2 g^{-1}$ .

**R<sup>1</sup> = (R)-2-Octyl, R<sup>2</sup> = C<sub>10</sub>H<sub>21</sub> (3).** Yield: 0.15 g, 55 %. <sup>1</sup>H NMR ( $CDCl_3$ , 500 MHz):  $\delta_1$  8.12 (d, 2H, O(O)C-Ar, AA' part of AA'XX' spin system,  $N = J_{AX} + J_{AX'} = 8.92$  Hz,  $J_{AA'} \approx J_{XX'}$ ),  $\delta_2$  7.63 (d, 2H, CN-Ar, AA' part of AA'XX' spin system,  $N = J_{AX} + J_{AX'} = 8.89$  Hz,  $J_{AA'} \approx J_{XX'}$ ),  $\delta_3$  7.39 (d, 2H, CN-Ar, XX' part of AA'XX' spin system,  $N = J_{AX} + J_{AX'} = 8.89$  Hz,  $J_{AA'} \approx J_{XX'}$ ),  $\delta_4$  6.99 (d, 2H, O(O)C-Ar, XX' part of AA'XX' spin system,  $N = J_{AX} + J_{AX'} = 8.92$  Hz,  $J_{AA'} \approx J_{XX'}$ ),  $\delta_5$  4.30 (m, 1H, CH),  $\delta_6$  4.05 (t, 2H, O-CH<sub>2</sub>,  $J = 6.51$  Hz),  $\delta_7$  1.80-1.20 (m, 26H, CH<sub>2</sub>),  $\delta_8$  1.28 (d, 3H, CH-CH<sub>3</sub>,  $J = 6.15$  Hz),  $\delta_9$  0.88 (t, 6H, CH<sub>3</sub>,  $J = 6.66$  Hz). <sup>19</sup>F NMR ( $CDCl_3$ , 470 MHz):  $\delta_1$  -117.83 (m, *F<sub>ortho</sub>*),  $\delta_2$  -155.95 (m, *F<sub>meta</sub>*). <sup>13</sup>C {<sup>1</sup>H} NMR ( $CDCl_3$ , 126 MHz): 164.07 (C=O), 163.95 (O-C<sub>Ar</sub>), 158.26 (C≡N), 153.16 (C<sub>Ar</sub>-O-C(O)), 149.91 (dm, *F<sub>ortho</sub>*-C<sub>Ar</sub>,  $^1J_{C-F} = 229$  Hz), 141.38 (dm, *F<sub>meta</sub>*-C<sub>Ar</sub>,  $^1J_{C-F} = 248$  Hz), 134.71 (m, O-C<sub>Ar</sub>), 132.47, 128.07 (C<sub>Ar</sub>-H), 127.70 (m, C<sub>Ar</sub>-Au), 123.79 (C<sub>Ar</sub>-H), 121.51 (CN-C<sub>Ar</sub>), 120.23 (O(O)C-C<sub>Ar</sub>), 114.50 (C<sub>Ar</sub>-H), 81.27 (Ar-O-CH), 68.43 (CH<sub>2</sub>-O-Ar), 36.76

(CH-CH<sub>2</sub>), 31.86, 31.77, 29.52, 29.51, 29.32, 29.28, 29.24, 29.03, 25.94, 25.24, 22.65, 22.57 (CH<sub>2</sub>), 20.01 (CH-CH<sub>3</sub>), 14.08, 14.05 (CH<sub>2</sub>-CH<sub>3</sub>). IR (cm<sup>-1</sup>): ν(C≡N): 2212; ν(C=O): 1728. . Anal. calcd (%) for C<sub>38</sub>H<sub>46</sub>AuF<sub>4</sub>NO<sub>4</sub>: C, 53.46; H, 5.43; N, 1.64. Found: C, 53.22; H, 5.01; N, 1.74. MALDI-TOF MS: *m/z* 854.3090 [M+H]<sup>+</sup> (calcd 854.3101 for C<sub>38</sub>H<sub>47</sub>AuF<sub>4</sub>NO<sub>4</sub>). [α]<sub>546</sub><sup>25</sup> (CHCl<sub>3</sub>): 14.4 deg cm<sup>2</sup> g<sup>-1</sup>.

**R<sup>1</sup> = C<sub>6</sub>H<sub>13</sub>, R<sup>2</sup> = (R)-2-Octyl (4).** Yield: 0.14 g, 55 %. <sup>1</sup>H NMR (CDCl<sub>3</sub>, 500 MHz): δ<sub>1</sub> 8.11 (d, 2H, O(O)C-Ar, AA' part of AA'XX' spin system, *N* = *J*<sub>AX</sub> + *J*<sub>AX'</sub> = 9.02 Hz, *J*<sub>AA'</sub> ≈ *J*<sub>XX'</sub>), δ<sub>2</sub> 7.62 (d, 2H, CN-Ar, AA' part of AA'XX' spin system, *N* = *J*<sub>AX</sub> + *J*<sub>AX'</sub> = 8.91 Hz, *J*<sub>AA'</sub> ≈ *J*<sub>XX'</sub>), δ<sub>3</sub> 7.39 (d, 2H, CN-Ar, XX' part of AA'XX' spin system, *N* = *J*<sub>AX</sub> + *J*<sub>AX'</sub> = 8.91 Hz, *J*<sub>AA'</sub> ≈ *J*<sub>XX'</sub>), δ<sub>4</sub> 6.96 (d, 2H, O(O)C-Ar, XX' part of AA'XX' spin system, *N* = *J*<sub>AX</sub> + *J*<sub>AX'</sub> = 9.02 Hz, *J*<sub>AA'</sub> ≈ *J*<sub>XX'</sub>), δ<sub>5</sub> 4.48 (m, 1H, CH), δ<sub>6</sub> 4.14 (t, 2H, O-CH<sub>2</sub>, *J* = 6.65 Hz), δ<sub>7</sub> 1.80-1.20 (m, 18H, CH<sub>2</sub>), δ<sub>8</sub> 1.35 (d, 3H, CH-CH<sub>3</sub>, *J* = 6.06 Hz), δ<sub>9</sub> 0.87 (t, 6H, CH<sub>3</sub>, *J* = 7.37 Hz). <sup>19</sup>F NMR (CDCl<sub>3</sub>, 470 MHz): δ<sub>1</sub> -117.68 (m, *F*<sub>ortho</sub>), δ<sub>2</sub> -156.99 (m, *F*<sub>meta</sub>). <sup>13</sup>C {<sup>1</sup>H} NMR (CDCl<sub>3</sub>, 126 MHz): 163.94 (C=O), 163.32 (O-C<sub>Ar</sub>), 158.21 (C≡N), 153.18 (C<sub>Ar</sub>-O-C(O)), 149.89 (dm, *F*<sub>ortho</sub>-C<sub>Ar</sub>, <sup>1</sup>*J*<sub>C-F</sub> = 229 Hz), 140.90 (dm, *F*<sub>meta</sub>-C<sub>Ar</sub>, <sup>1</sup>*J*<sub>C-F</sub> = 248 Hz), 135.73 (m, O-C<sub>Ar</sub>), 132.53, 128.07 (C<sub>Ar</sub>-H), 127.50 (m, C<sub>Ar</sub>-Au), 123.78 (C<sub>Ar</sub>-H), 121.49 (CN-C<sub>Ar</sub>), 119.91 (O(O)C-C<sub>Ar</sub>), 115.35 (C<sub>Ar</sub>-H), 75.03 (CH<sub>2</sub>-O-Ar), 74.29 (Ar-O-CH), 36.25 (CH-CH<sub>2</sub>), 31.73, 31.47, 29.84, 29.18, 25.38, 25.25, 22.55, 22.54 (CH<sub>2</sub>), 19.54 (CH-CH<sub>3</sub>), 14.09, 13.99 (CH<sub>2</sub>-CH<sub>3</sub>). IR (cm<sup>-1</sup>): ν(C≡N): 2215; ν(C=O): 1729. Anal. calcd (%) for C<sub>34</sub>H<sub>38</sub>AuF<sub>4</sub>NO<sub>4</sub>: C, 51.20; H, 4.80; N, 1.76. Found: C, 51.29; H, 5.02; N, 1.86. MALDI-TOF MS: *m/z* 798.2502 [M+H]<sup>+</sup> (calcd 798.2475 for C<sub>34</sub>H<sub>39</sub>AuF<sub>4</sub>NO<sub>4</sub>). [α]<sub>546</sub><sup>25</sup> (CHCl<sub>3</sub>): 4.5 deg cm<sup>2</sup> g<sup>-1</sup>.

**R<sup>1</sup> = C<sub>8</sub>H<sub>17</sub>, R<sup>2</sup> = (R)-2-Octyl (5).** Yield: 0.14 g, 55 %. <sup>1</sup>H NMR (CDCl<sub>3</sub>, 500 MHz): δ<sub>1</sub> 8.11 (d, 2H, O(O)C-Ar, AA' part of AA'XX' spin system, *N* = *J*<sub>AX</sub> + *J*<sub>AX'</sub> = 8.98 Hz, *J*<sub>AA'</sub> ≈ *J*<sub>XX'</sub>), δ<sub>2</sub> 7.62 (d, 2H, CN-Ar, AA' part of AA'XX' spin system, *N* = *J*<sub>AX</sub> + *J*<sub>AX'</sub> = 8.97 Hz, *J*<sub>AA'</sub> ≈ *J*<sub>XX'</sub>), δ<sub>3</sub> 7.39 (d, 2H, CN-Ar, XX' part of AA'XX' spin system, *N* = *J*<sub>AX</sub> + *J*<sub>AX'</sub> = 8.97 Hz, *J*<sub>AA'</sub> ≈ *J*<sub>XX'</sub>), δ<sub>4</sub> 6.96 (d, 2H, O(O)C-Ar, XX' part of AA'XX' spin system, *N* = *J*<sub>AX</sub> + *J*<sub>AX'</sub> = 8.98 Hz, *J*<sub>AA'</sub> ≈ *J*<sub>XX'</sub>), δ<sub>5</sub> 4.50 (m, 1H, CH), δ<sub>6</sub> 4.14 (t, 2H, O-CH<sub>2</sub>, *J* = 6.70 Hz), δ<sub>7</sub> 1.80-1.20 (m, 22H, CH<sub>2</sub>), δ<sub>8</sub> 1.35 (d, 3H, CH-CH<sub>3</sub>, *J* = 6.52 Hz), δ<sub>9</sub> 0.87 (t, 6H, CH<sub>3</sub>, *J* = 6.79 Hz). <sup>19</sup>F NMR (CDCl<sub>3</sub>, 470 MHz): δ<sub>1</sub> -117.70 (m, *F*<sub>ortho</sub>), δ<sub>2</sub> -156.99 (m, *F*<sub>meta</sub>). <sup>13</sup>C {<sup>1</sup>H} NMR (CDCl<sub>3</sub>, 126 MHz): 163.94 (C=O), 163.32 (O-C<sub>Ar</sub>),

158.21 (C≡N), 153.18 (C<sub>Ar</sub>-O-C(O)), 149.90 (dm, F<sub>ortho</sub>-C<sub>Ar</sub>, <sup>1</sup>J<sub>C-F</sub> = 228 Hz), 140.90 (dm, F<sub>meta</sub>-C<sub>Ar</sub>, <sup>1</sup>J<sub>C-F</sub> = 250 Hz), 135.73 (m, O-C<sub>Ar</sub>), 132.53, 128.06 (C<sub>Ar</sub>-H), 127.49 (m, C<sub>Ar</sub>-Au), 123.79 (C<sub>Ar</sub>-H), 121.49 (CN-C<sub>Ar</sub>), 119.91 (O(O)C-C<sub>Ar</sub>), 115.35 (C<sub>Ar</sub>-H), 75.03 (CH<sub>2</sub>-O-Ar), 74.29 (Ar-O-CH), 36.25 (CH-CH<sub>2</sub>), 31.76, 31.73, 29.88, 29.24, 29.18, 29.18, 25.58, 25.38, 22.62, 22.55 (CH<sub>2</sub>), 19.54 (CH-CH<sub>3</sub>), 14.07, 14.04 (CH<sub>2</sub>-CH<sub>3</sub>). IR (cm<sup>-1</sup>): ν(C≡N): 2215; ν(C=O): 1729. Anal. calcd (%) for C<sub>36</sub>H<sub>42</sub>AuF<sub>4</sub>NO<sub>4</sub>: C, 52.37; H, 5.13; N, 1.70. Found: C, 52.45; H, 4.92; N, 1.53. MALDI-TOF MS: *m/z* 826.2797 [M+H]<sup>+</sup> (calcd 826.2788 for C<sub>36</sub>H<sub>43</sub>AuF<sub>4</sub>NO<sub>4</sub>). [α]<sub>546</sub><sup>25</sup> (CHCl<sub>3</sub>): 5.0 deg cm<sup>2</sup> g<sup>-1</sup>.

**R<sup>1</sup> = C<sub>10</sub>H<sub>21</sub>, R<sup>2</sup> = (R)-2-Octyl (6).** Yield: 0.15 g, 58 %. <sup>1</sup>H NMR (CDCl<sub>3</sub>, 500 MHz): δ<sub>1</sub> 8.11 (d, 2H, O(O)C-Ar, AA' part of AA'XX' spin system, *N* = *J*<sub>AX</sub> + *J*<sub>AX'</sub> = 8.93 Hz, *J*<sub>AA'</sub> ≈ *J*<sub>XX'</sub>), δ<sub>2</sub> 7.62 (d, 2H, CN-Ar, AA' part of AA'XX' spin system, *N* = *J*<sub>AX</sub> + *J*<sub>AX'</sub> = 8.92 Hz, *J*<sub>AA'</sub> ≈ *J*<sub>XX'</sub>), δ<sub>3</sub> 7.39 (d, 2H, CN-Ar, XX' part of AA'XX' spin system, *N* = *J*<sub>AX</sub> + *J*<sub>AX'</sub> = 8.92 Hz, *J*<sub>AA'</sub> ≈ *J*<sub>XX'</sub>), δ<sub>4</sub> 6.96 (d, 2H, O(O)C-Ar, XX' part of AA'XX' spin system, *N* = *J*<sub>AX</sub> + *J*<sub>AX'</sub> = 8.93 Hz, *J*<sub>AA'</sub> ≈ *J*<sub>XX'</sub>), δ<sub>5</sub> 4.50 (m, 1H, CH), δ<sub>6</sub> 4.14 (t, 2H, O-CH<sub>2</sub>, *J* = 6.67 Hz), δ<sub>7</sub> 1.80-1.20 (m, 26H, CH<sub>2</sub>), δ<sub>8</sub> 1.35 (d, 3H, CH-CH<sub>3</sub>, *J* = 6.06 Hz), δ<sub>9</sub> 0.88 (t, 6H, CH<sub>3</sub>, *J* = 6.89 Hz). <sup>19</sup>F NMR (CDCl<sub>3</sub>, 470 MHz): δ<sub>1</sub> -117.70 (m, F<sub>ortho</sub>), δ<sub>2</sub> -158.00 (m, F<sub>meta</sub>). <sup>13</sup>C {<sup>1</sup>H} NMR (CDCl<sub>3</sub>, 126 MHz): 163.94 (C=O), 163.32 (C<sub>Ar</sub>-O), 158.22 (C≡N), 153.18 (C<sub>Ar</sub>-O-C(O)), 148.89 (dm, F<sub>ortho</sub>-C<sub>Ar</sub>, <sup>1</sup>J<sub>C-F</sub> = 228 Hz), 140.88 (dm, F<sub>meta</sub>-C<sub>Ar</sub>, <sup>1</sup>J<sub>C-F</sub> = 250 Hz), 135.74 (m, O-C<sub>Ar</sub>), 132.53, 128.07 (C<sub>Ar</sub>-H), 127.48 (m, C<sub>Ar</sub>-Au), 123.79 (C<sub>Ar</sub>-H), 121.49 (C≡N-C<sub>Ar</sub>), 119.91 (O(O)C-C<sub>Ar</sub>), 115.35 (C<sub>Ar</sub>-H), 75.03 (CH<sub>2</sub>-O-Ar), 74.29 (Ar-O-CH), 36.25 (CH-CH<sub>2</sub>), 31.87, 31.73, 29.88, 29.52, 29.51, 29.28, 29.18, 25.58, 25.38, 22.66, 22.55 (CH<sub>2</sub>), 19.54 (CH-CH<sub>3</sub>), 14.09, 14.04 (CH<sub>2</sub>-CH<sub>3</sub>). IR (cm<sup>-1</sup>): ν(C≡N): 2214; ν(C=O): 1729. Anal. calcd (%) for C<sub>38</sub>H<sub>46</sub>AuF<sub>4</sub>NO<sub>4</sub>: C, 53.46; H, 5.43; N, 1.64. Found: C, 53.53; H, 5.18; N, 1.72. MALDI-TOF MS: *m/z* 854.3105 [M+H]<sup>+</sup> (calcd 854.3101 for C<sub>38</sub>H<sub>47</sub>AuF<sub>4</sub>NO<sub>4</sub>). [α]<sub>546</sub><sup>25</sup> (CHCl<sub>3</sub>): 4.0 deg cm<sup>2</sup> g<sup>-1</sup>.

**R<sup>1</sup> = (R)-2-Octyl, R<sup>2</sup> = (R)-2-Octyl (7).** Yield: 0.13 g, 51 %. <sup>1</sup>H NMR (CDCl<sub>3</sub>, 500 MHz): δ<sub>1</sub> 8.11 (d, 2H, O(O)C-Ar, AA' part of AA'XX' spin system, *N* = *J*<sub>AX</sub> + *J*<sub>AX'</sub> = 9.01 Hz, *J*<sub>AA'</sub> ≈ *J*<sub>XX'</sub>), δ<sub>2</sub> 7.62 (d, 2H, CN-Ar, AA' part of AA'XX' spin system, *N* = *J*<sub>AX</sub> + *J*<sub>AX'</sub> = 8.95 Hz, *J*<sub>AA'</sub> ≈ *J*<sub>XX'</sub>), δ<sub>3</sub> 7.39 (d, 2H, CN-Ar, XX' part of AA'XX' spin system, *N* = *J*<sub>AX</sub> + *J*<sub>AX'</sub> = 8.95 Hz, *J*<sub>AA'</sub> ≈ *J*<sub>XX'</sub>), δ<sub>4</sub> 6.96 (d, 2H, O(O)C-Ar, XX' part of AA'XX' spin system, *N* = *J*<sub>AX</sub> + *J*<sub>AX'</sub> = 8.93 Hz, *J*<sub>AA'</sub> ≈ *J*<sub>XX'</sub>),

$\delta_5$  4.49 (m, 1H, CH),  $\delta_6$  4.30 (m, 1H, CH),  $\delta_7$  1.80-1.20 (m, 20H, CH<sub>2</sub>),  $\delta_8$  1.35 (d, 3H, CH-CH<sub>3</sub>,  $J$  = 6.09 Hz),  $\delta_9$  1.27 (d, 3H, CH-CH<sub>3</sub>,  $J$  = 6.08 Hz),  $\delta_{10}$  0.89 (t, 6H, CH<sub>3</sub>,  $J$  = 6.85 Hz). <sup>19</sup>F NMR (CDCl<sub>3</sub>, 470 MHz):  $\delta_1$  -117.83 (m, F<sub>ortho</sub>),  $\delta_2$  -155.94 (m, F<sub>meta</sub>). <sup>13</sup>C {<sup>1</sup>H} NMR (CDCl<sub>3</sub>, 126 MHz): 163.94 (C=O), 163.32 (O-C<sub>Ar</sub>), 158.28 (C≡N), 153.18 (C<sub>Ar</sub>-O-C(O)), 149.91 (dm, F<sub>ortho</sub>-C<sub>Ar</sub>, <sup>1</sup>J<sub>C-F</sub> = 228 Hz), 141.38 (dm, F<sub>meta</sub>-C<sub>Ar</sub>, <sup>1</sup>J<sub>C-F</sub> = 248 Hz), 134.72 (m, O-C<sub>Ar</sub>), 132.53 (C<sub>Ar</sub>-H), 128.16 (m, C<sub>Ar</sub>-Au), 128.07 (C<sub>Ar</sub>-H), 123.80 (C<sub>Ar</sub>-H), 121.50 (CN-C<sub>Ar</sub>), 119.91 (O(O)C-C<sub>Ar</sub>), 115.35 (C<sub>Ar</sub>-H), 81.27, 74.29 (Ar-O-CH), 36.76, 36.24 (CH-CH<sub>2</sub>), 31.76, 31.73, 29.24, 29.17, 25.38, 25.24, 22.57, 22.55 (CH<sub>2</sub>), 20.01, 19.54 (CH-CH<sub>3</sub>), 14.05, 14.03 (CH<sub>2</sub>-CH<sub>3</sub>). IR (cm<sup>-1</sup>): ν(C≡N): 2213; ν(C=O): 1727. Anal. calcd (%) for C<sub>36</sub>H<sub>42</sub>AuF<sub>4</sub>NO<sub>4</sub>: C, 52.37; H, 5.13; N, 1.70. Found: C, 53.31; H, 5.00; N, 1.88. MALDI-TOF MS:  $m/z$  826.2750 [M+H]<sup>+</sup> (calcd 826.2788 for C<sub>36</sub>H<sub>43</sub>AuF<sub>4</sub>NO<sub>4</sub>). [ $\alpha$ ]<sub>546</sub><sup>25</sup> (CHCl<sub>3</sub>): 4.2 deg cm<sup>2</sup> g<sup>-1</sup>.

**$^1\text{H}$  RMN spectra [Varian 500 (499.72 MHz)].**

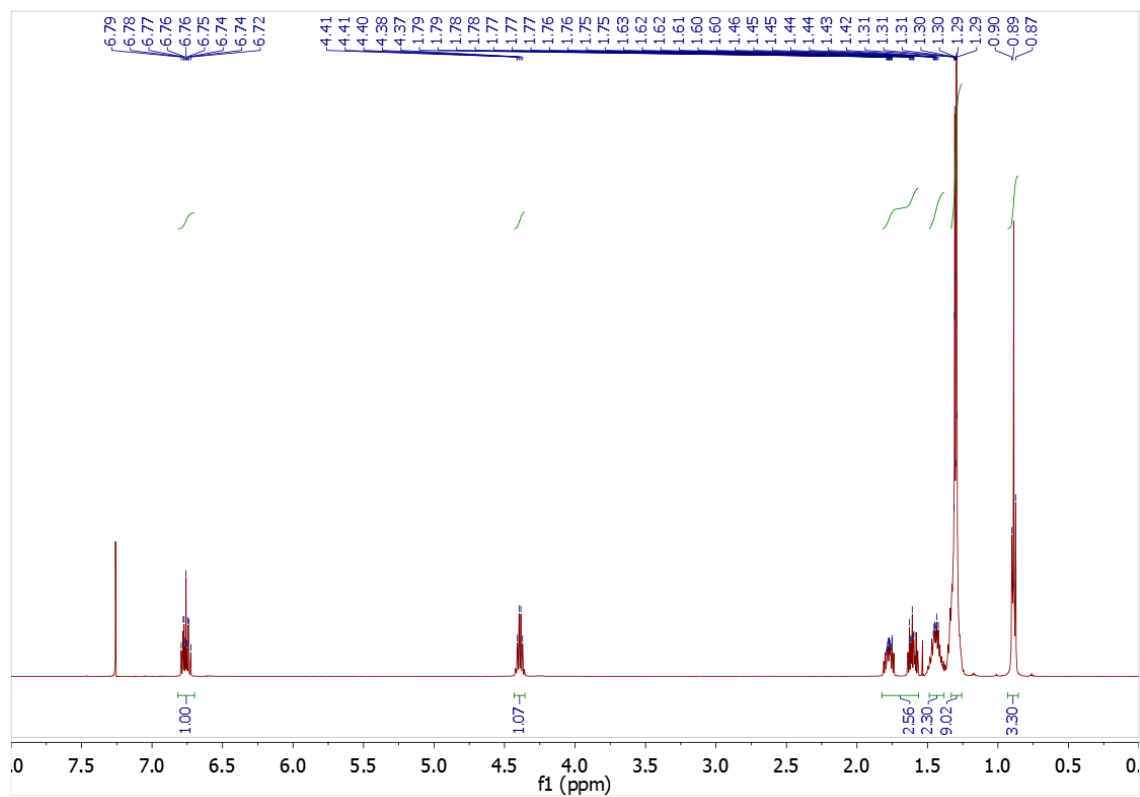

**Figure S1:**  $^1\text{H}$  NMR ( $\text{CDCl}_3$ ) spectrum of  $\text{HC}_6\text{F}_4\text{O}-(\text{R})-2\text{-Octyl}$ .

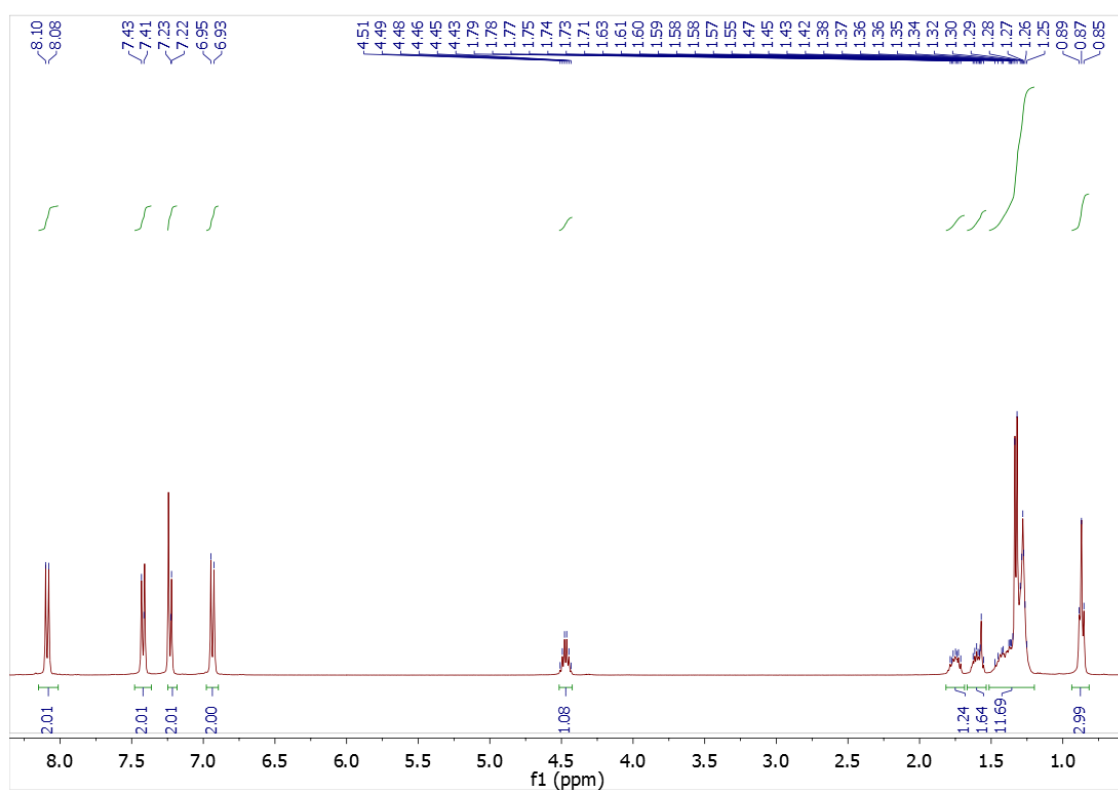

**Figure S2:**  $^1\text{H}$  NMR ( $\text{CDCl}_3$ ) spectrum of **CNC8\***.

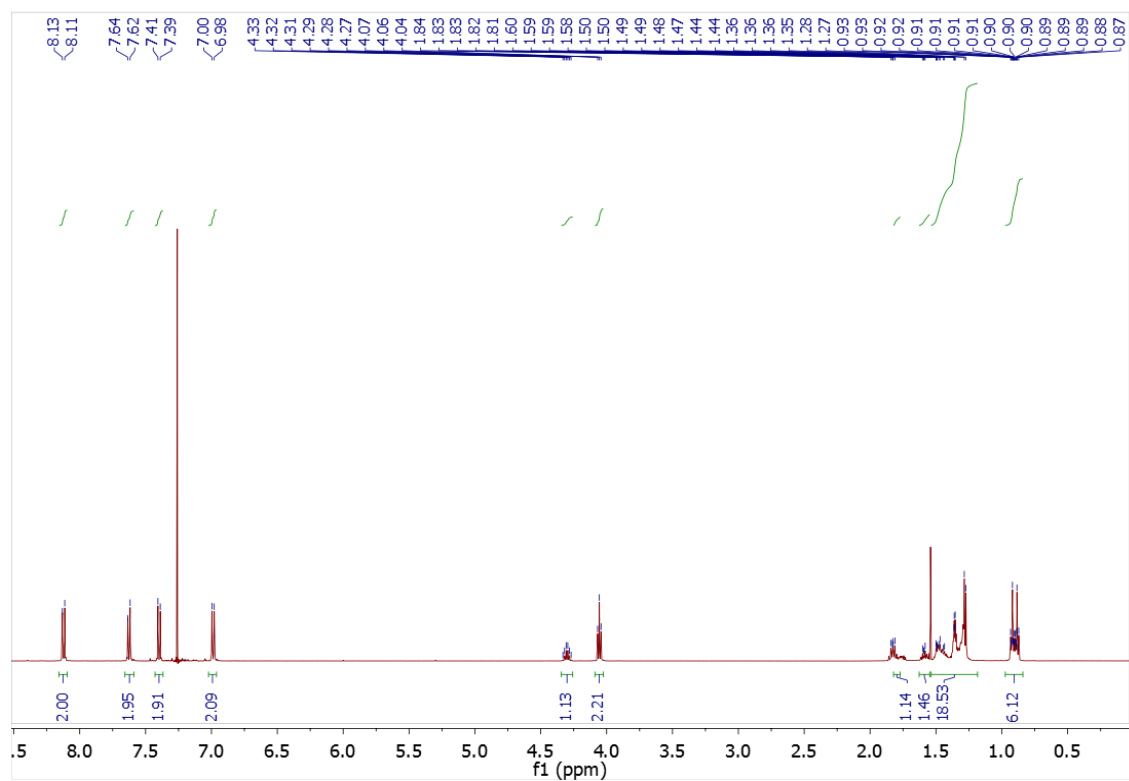

Figure S3: <sup>1</sup>H NMR (CDCl<sub>3</sub>) spectrum of 1.

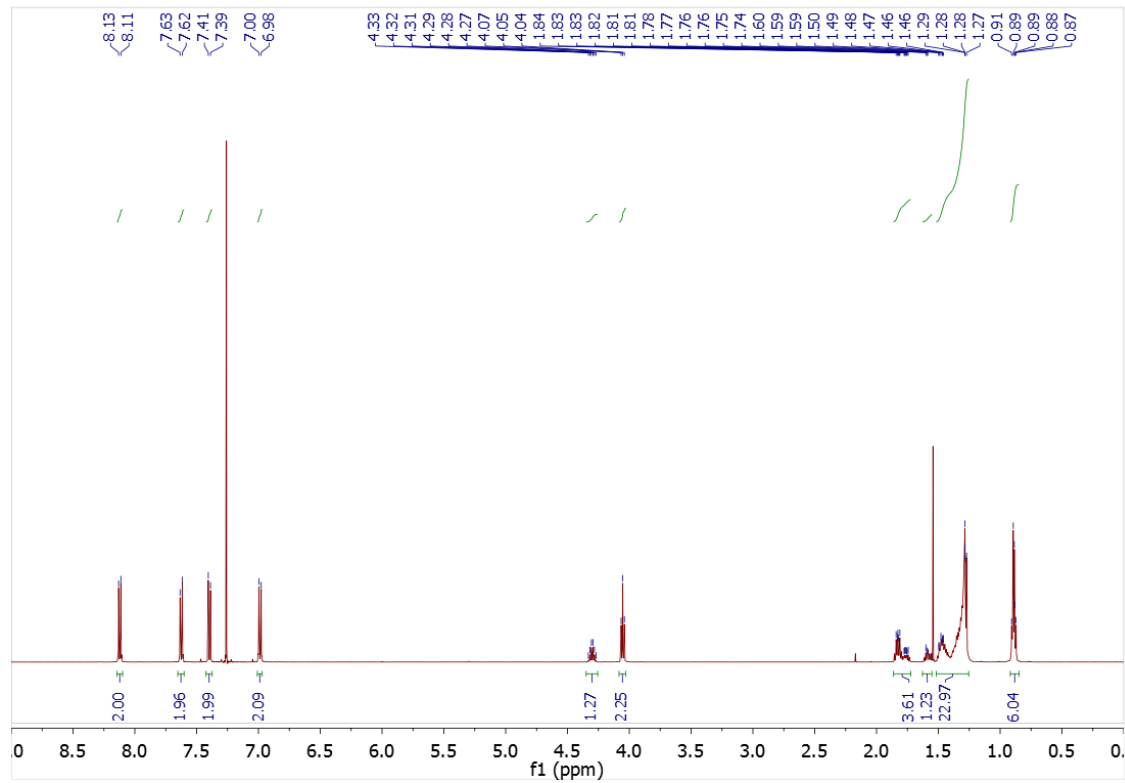

Figure S4: <sup>1</sup>H NMR (CDCl<sub>3</sub>) spectrum of 2.

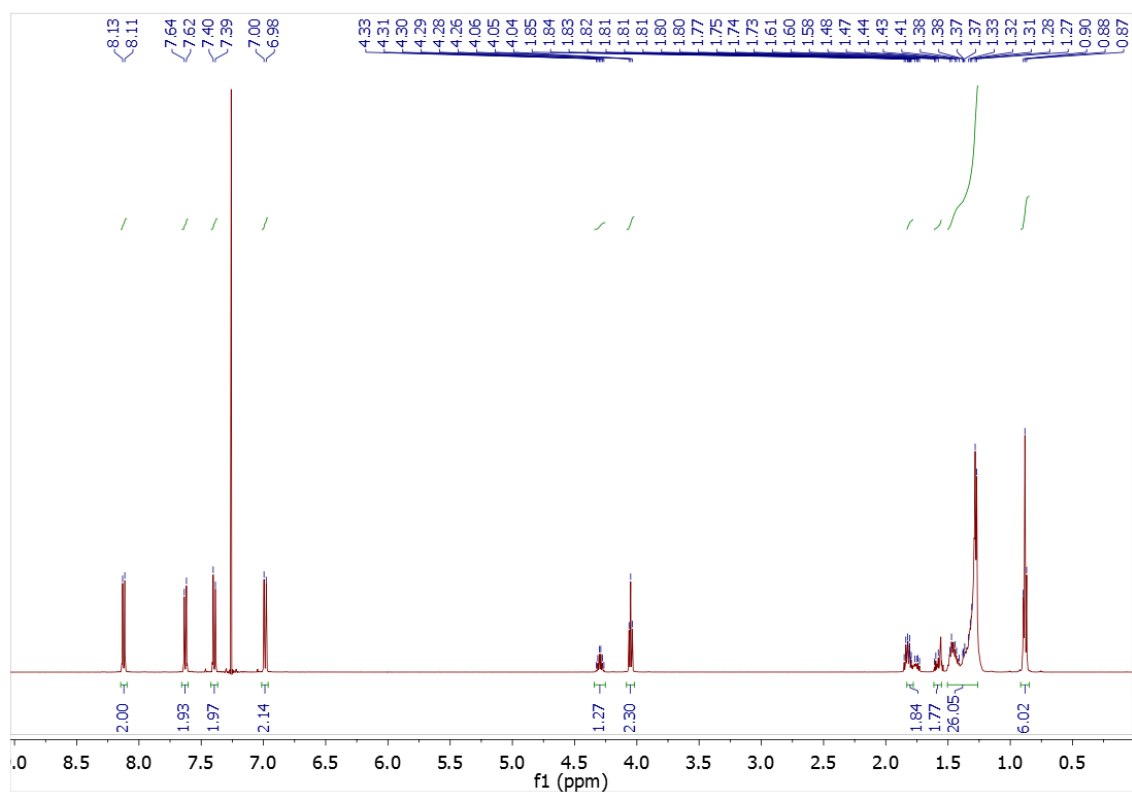

**Figure S5:** <sup>1</sup>H NMR (CDCl<sub>3</sub>) spectrum of **3**.

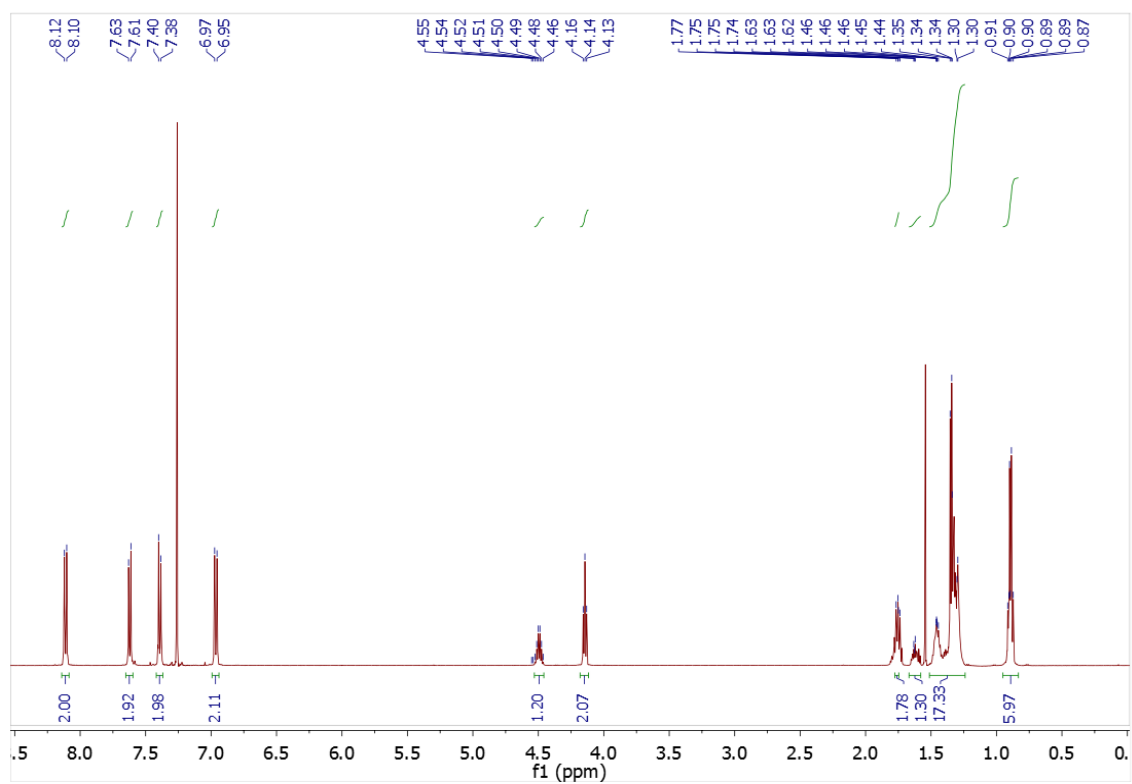

**Figure S6:** <sup>1</sup>H NMR (CDCl<sub>3</sub>) spectrum of **4**.

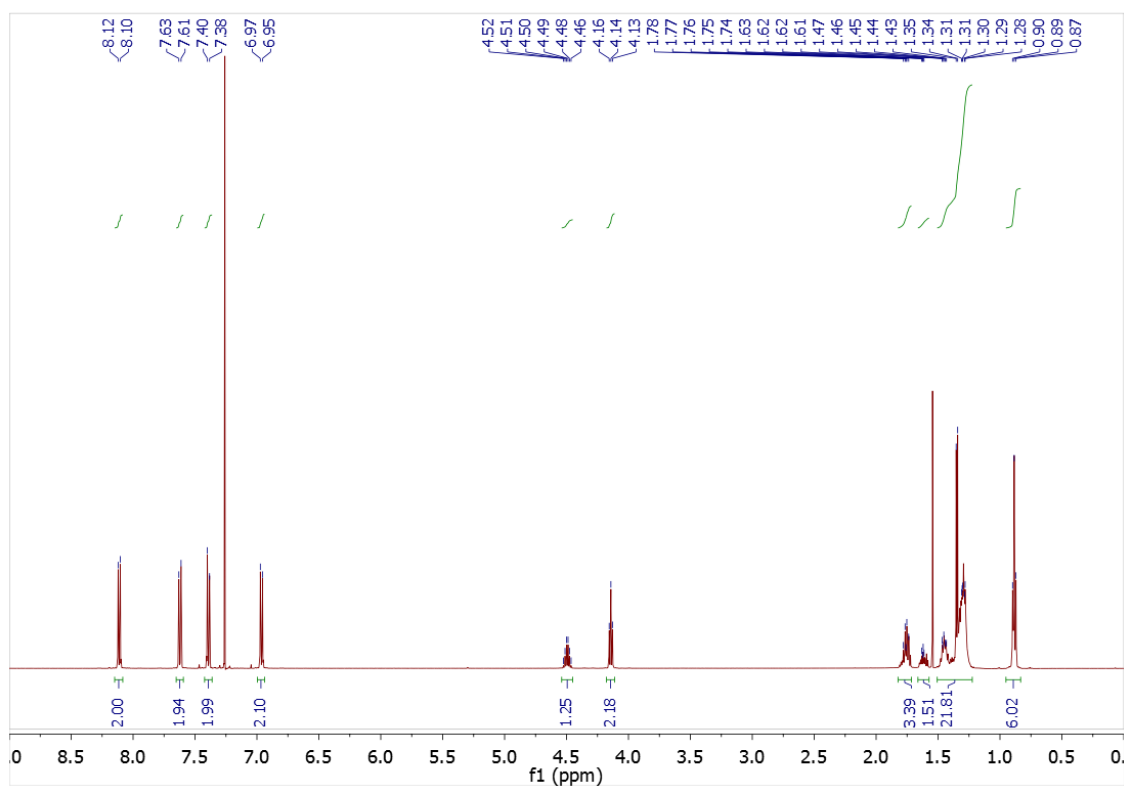

Figure S7: <sup>1</sup>H NMR (CDCl<sub>3</sub>) spectrum of **5**.

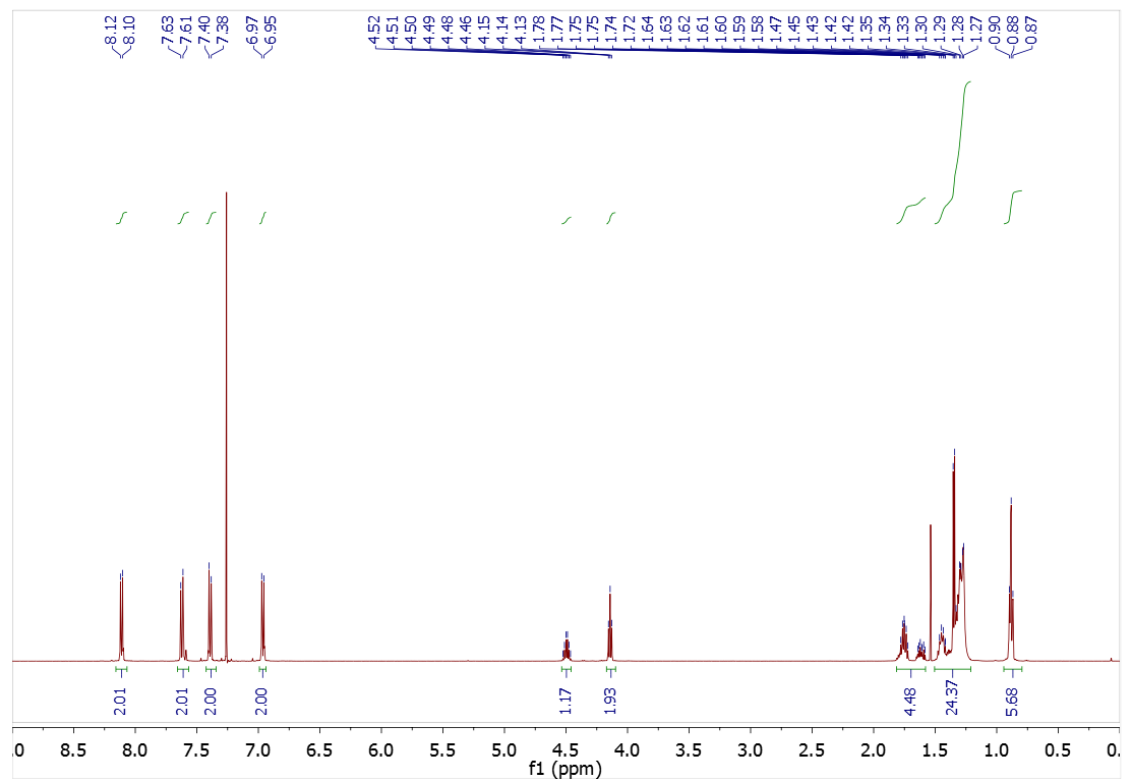

Figure S8: <sup>1</sup>H NMR (CDCl<sub>3</sub>) spectrum of **6**.

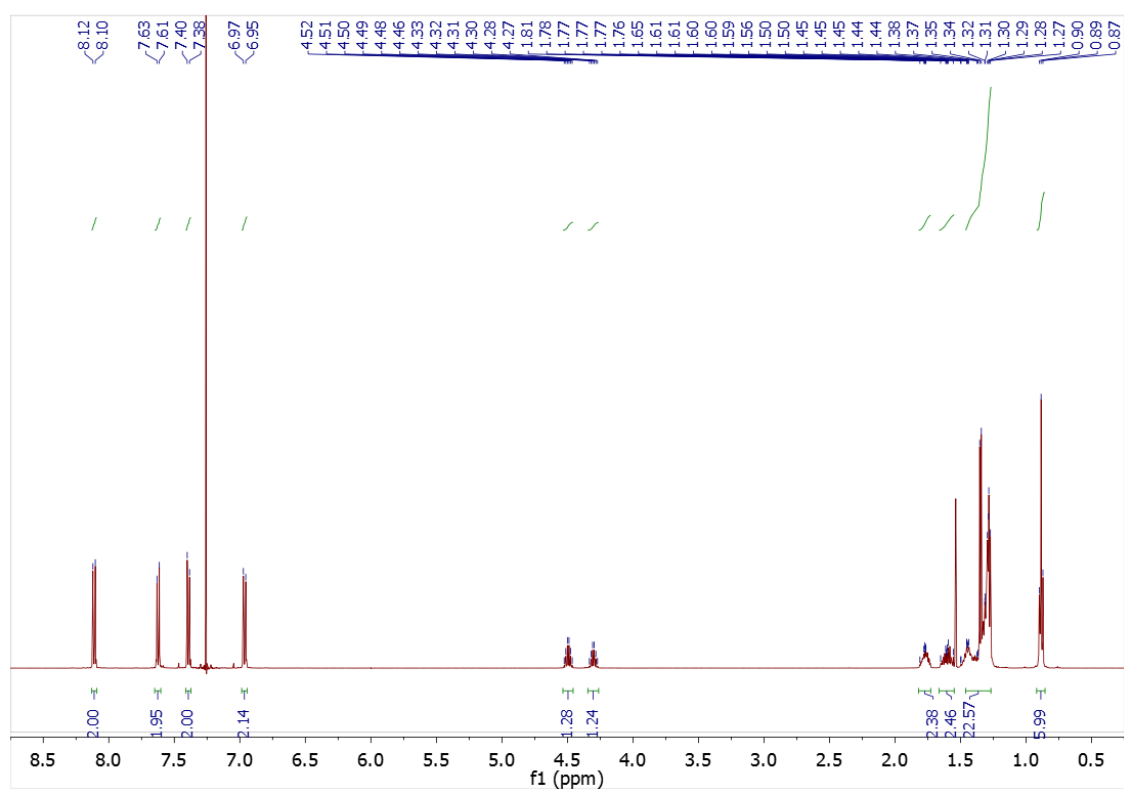

**Figure S9:** <sup>1</sup>H NMR (CDCl<sub>3</sub>) spectrum of 7.

$^{13}\text{C}\{^1\text{H}\}$  NMR spectra [Varian 500 (125.67 MHz)].

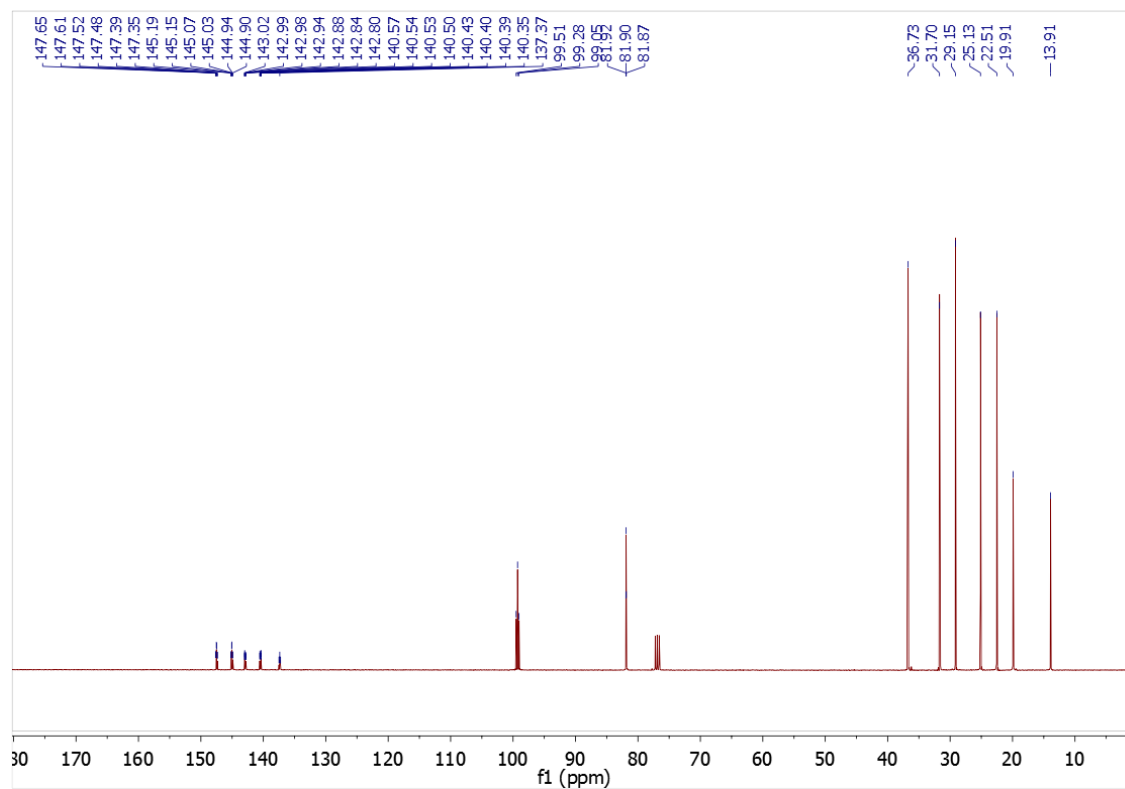

**Figure S10:**  $^{13}\text{C}\{^1\text{H}\}$  NMR ( $\text{CDCl}_3$ ) spectrum of **HC<sub>6</sub>F<sub>4</sub>O-(R)-2-Octyl**.

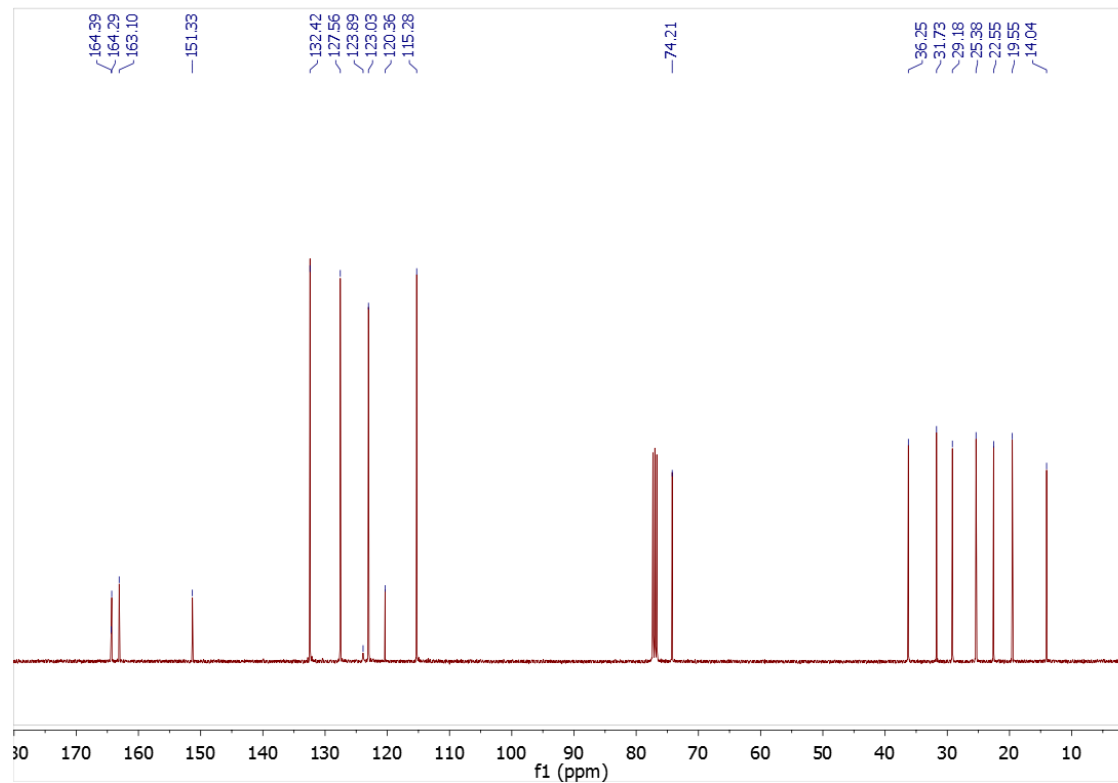

**Figure S11:**  $^{13}\text{C}\{^1\text{H}\}$  NMR ( $\text{CDCl}_3$ ) spectrum of **CN8\***.

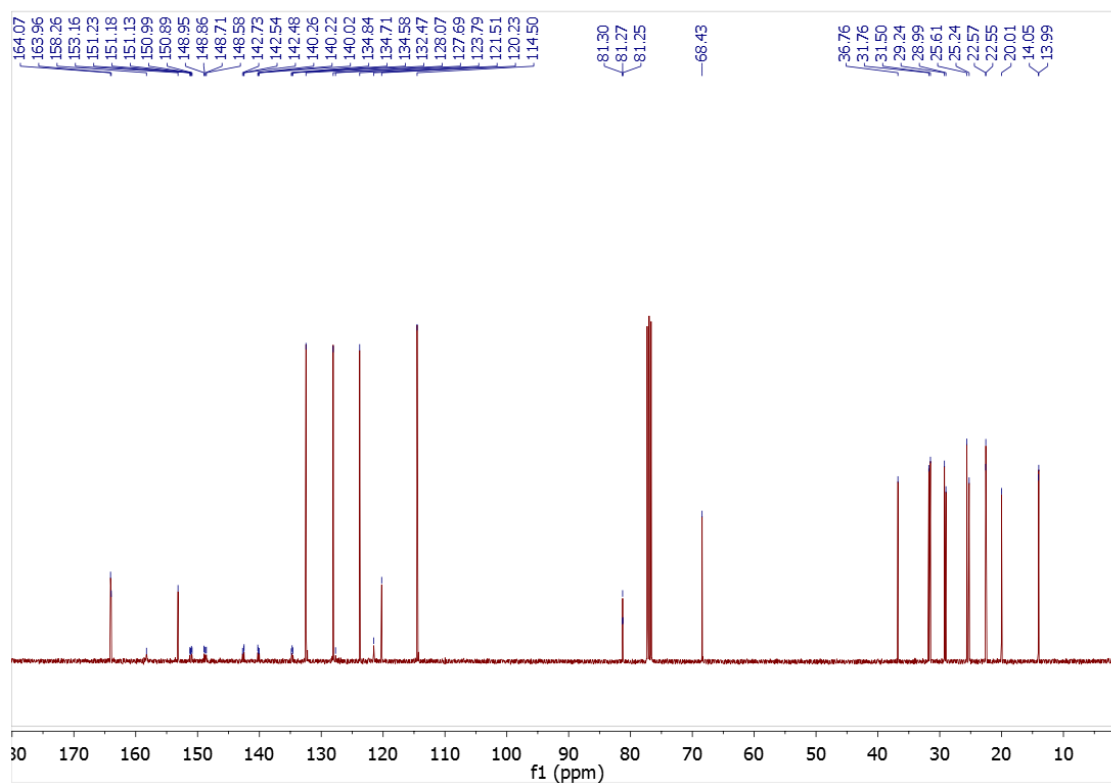

**Figure S12:**  $^{13}\text{C}\{^1\text{H}\}$  NMR ( $\text{CDCl}_3$ ) spectrum of **1**.

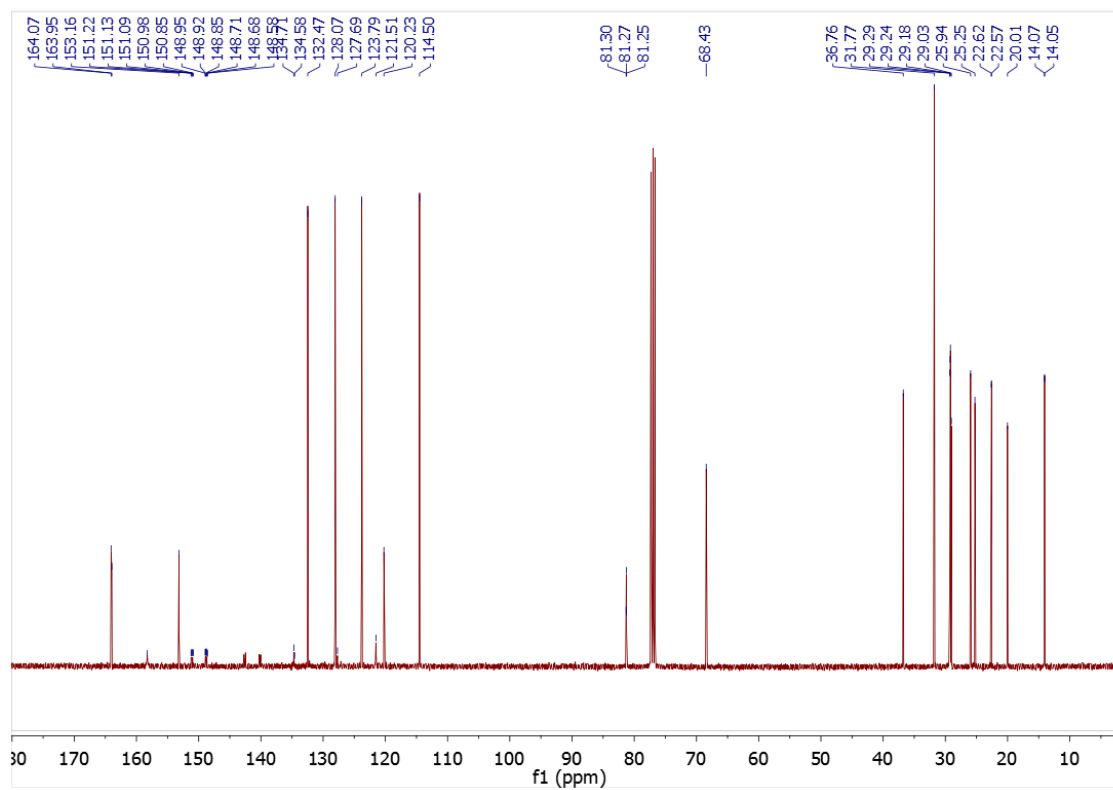

**Figure S13:**  $^{13}\text{C}\{^1\text{H}\}$  NMR ( $\text{CDCl}_3$ ) spectrum of **2**.

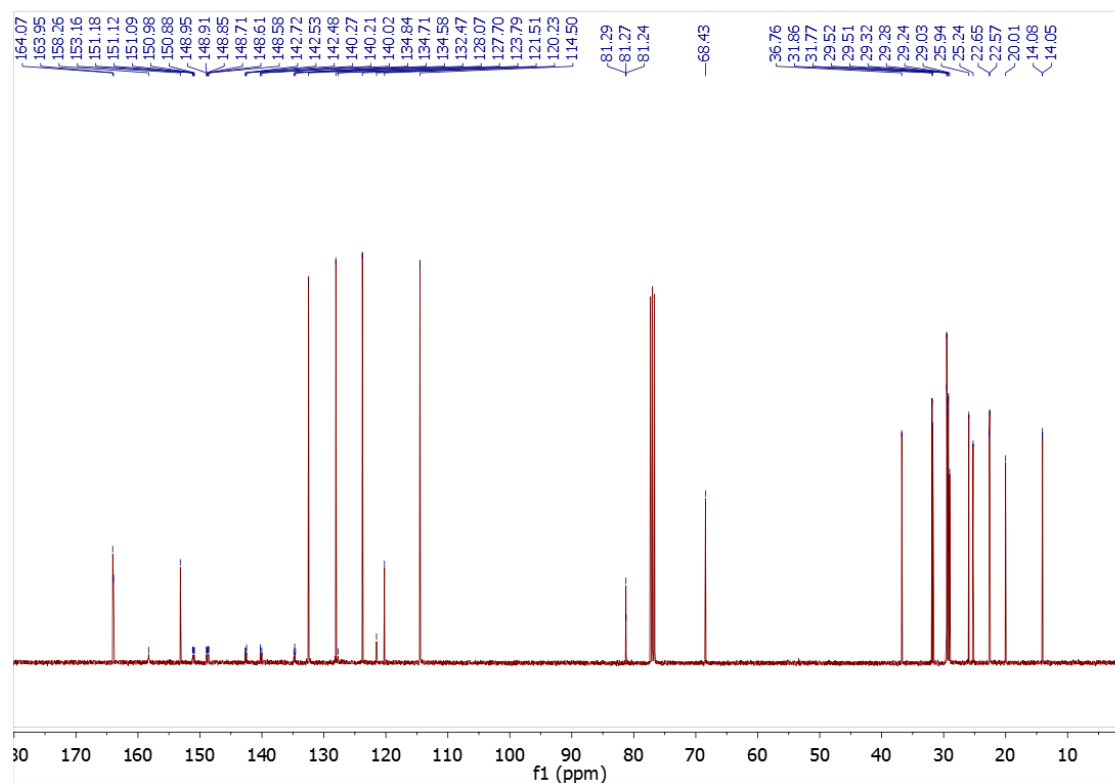

**Figure S14:**  $^{13}\text{C}\{^1\text{H}\}$  NMR ( $\text{CDCl}_3$ ) spectrum of **3**.

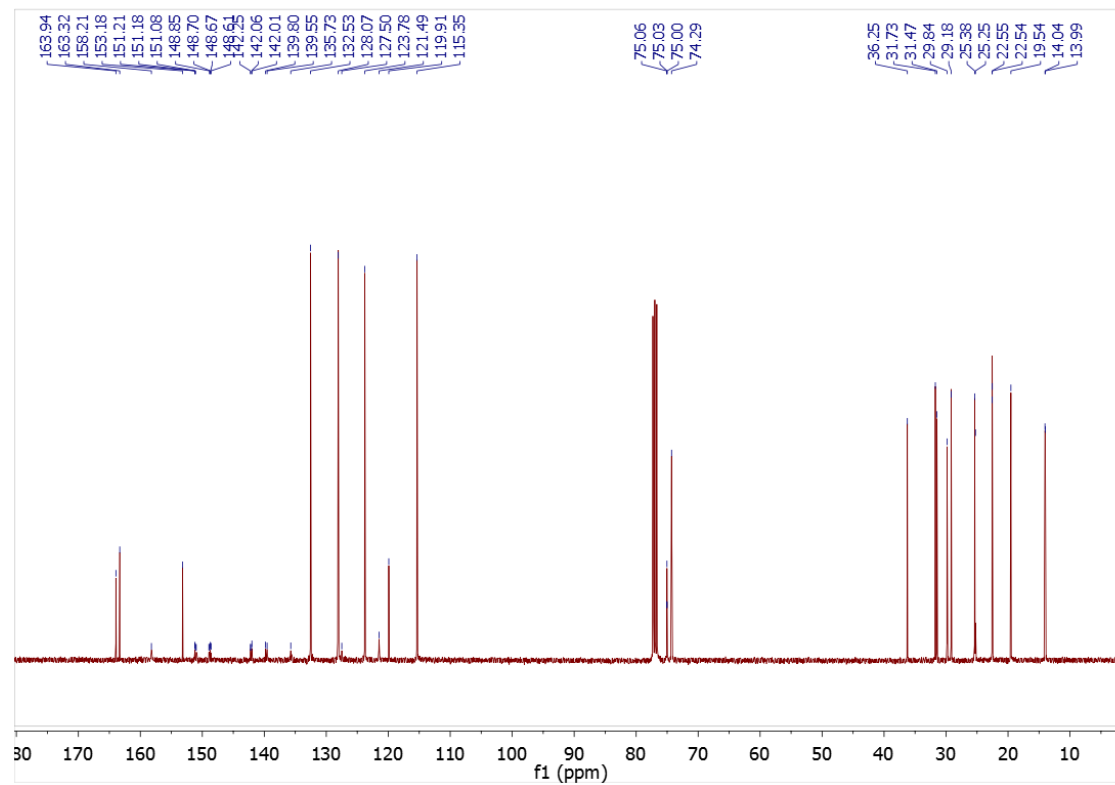

**Figure S15:**  $^{13}\text{C}\{^1\text{H}\}$  NMR ( $\text{CDCl}_3$ ) spectrum of **4**.

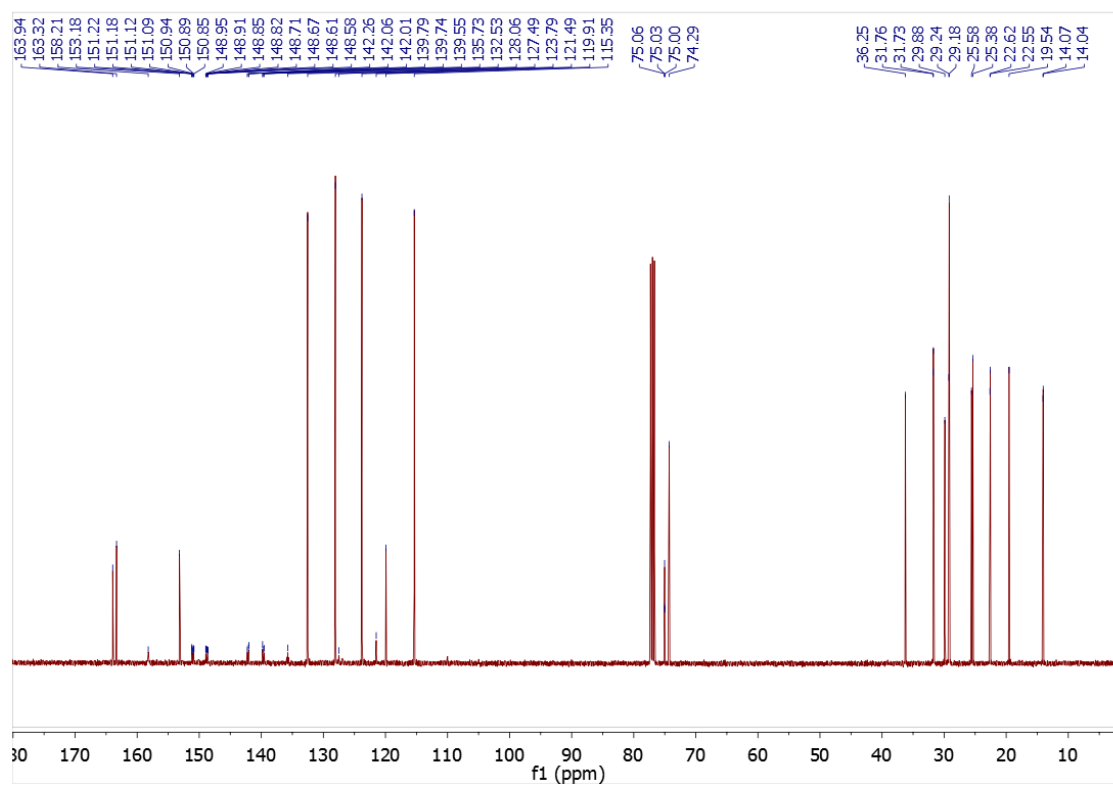

**Figure S16:**  $^{13}\text{C}\{^1\text{H}\}$  NMR ( $\text{CDCl}_3$ ) spectrum of **5**.

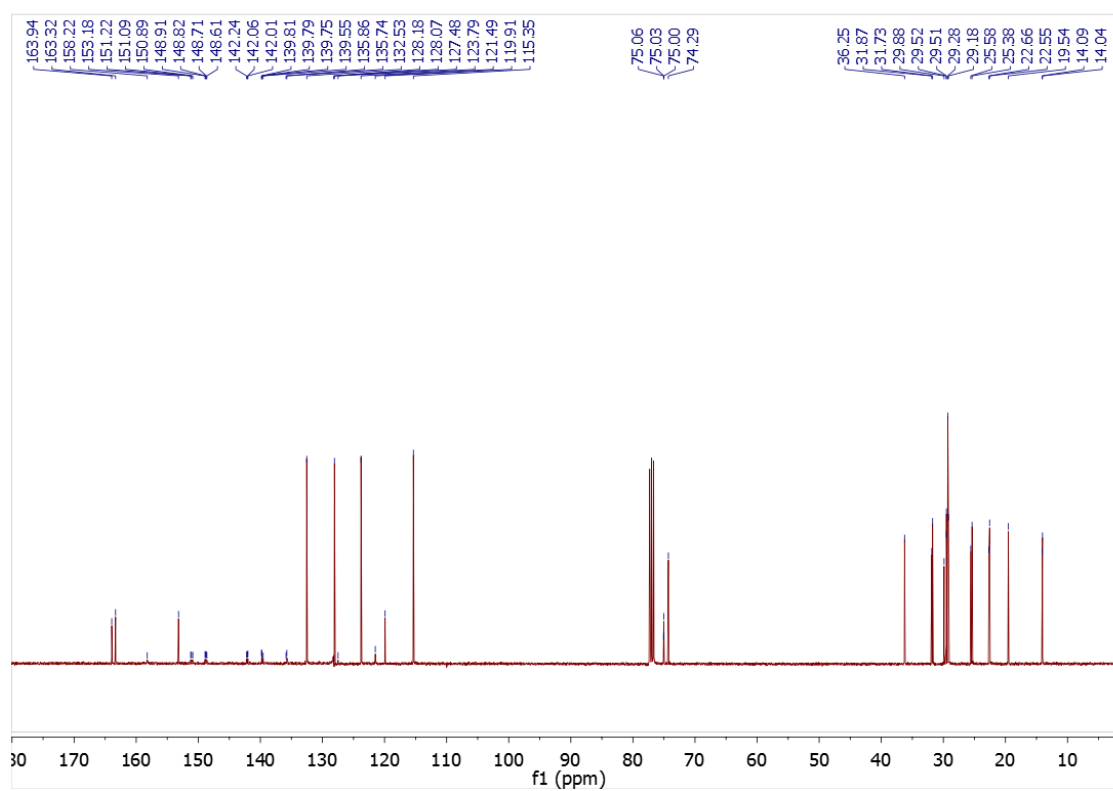

**Figure S17:**  $^{13}\text{C}\{^1\text{H}\}$  NMR ( $\text{CDCl}_3$ ) spectrum of **6**.

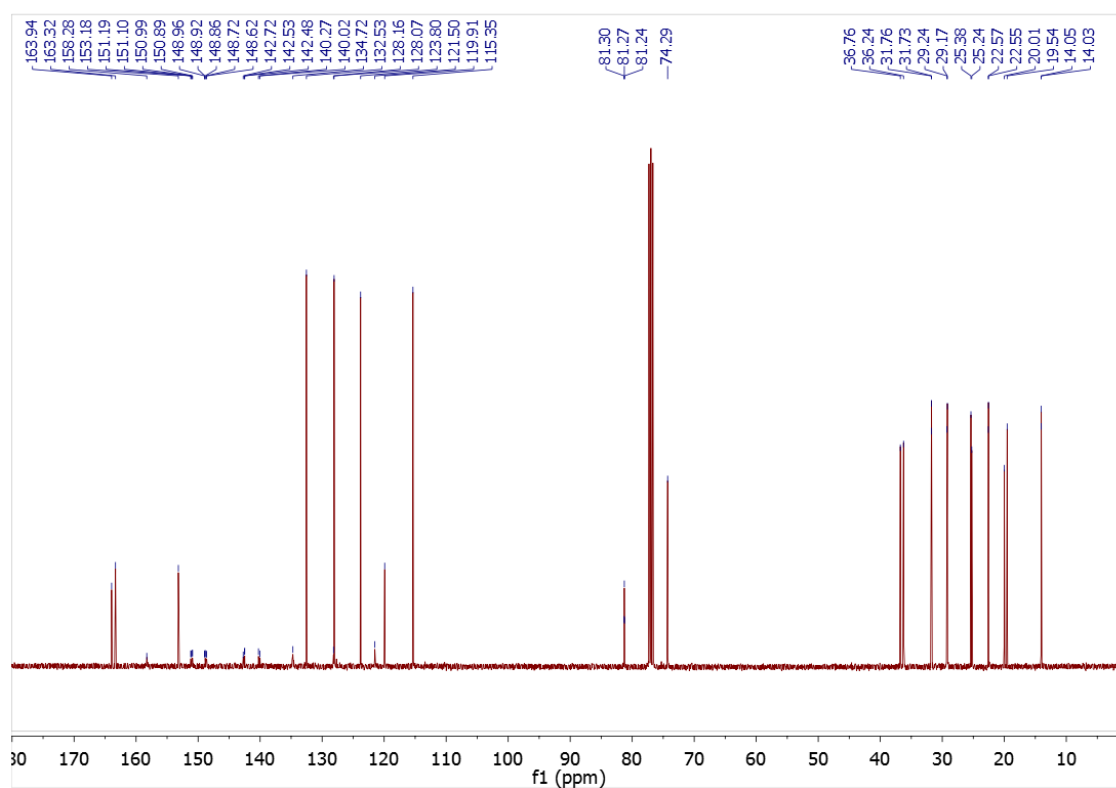

**Figure S18:**  $^{13}\text{C}\{^1\text{H}\}$  NMR ( $\text{CDCl}_3$ ) spectrum of **7**.

**$^{19}\text{F}$  NMR spectra [Varian 500 (470.14 MHz)].**

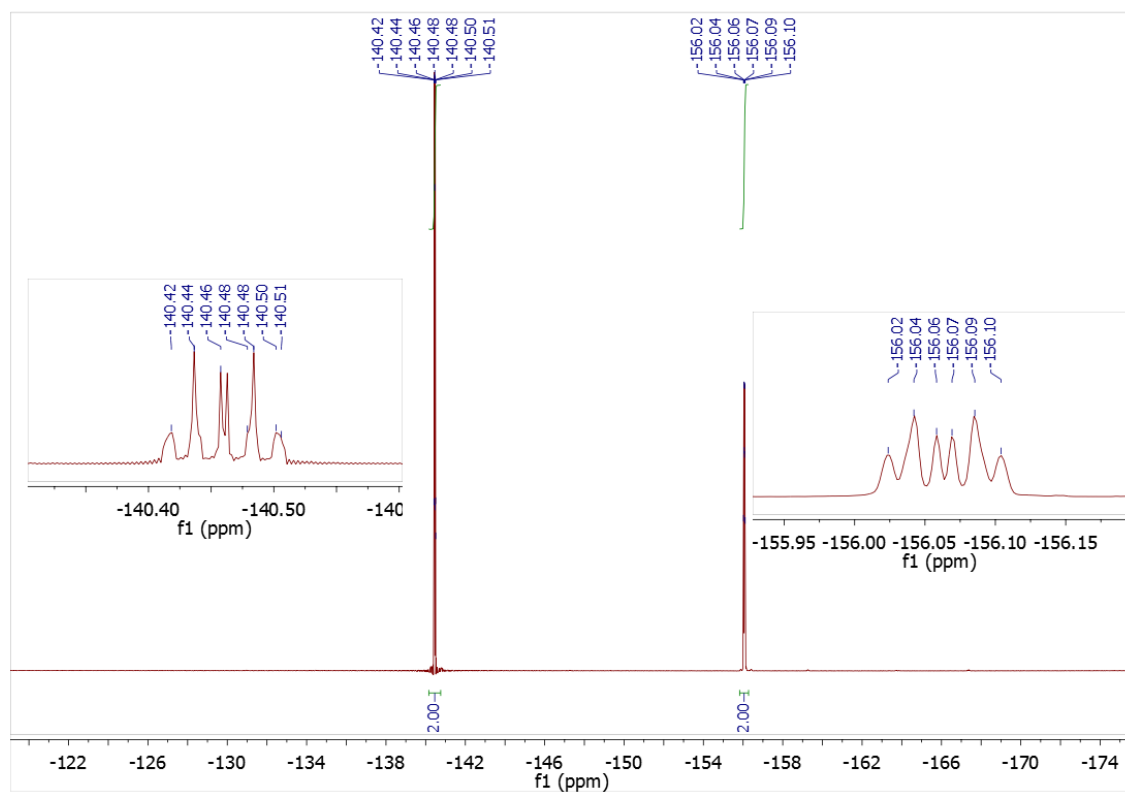

**Figure S19:**  $^{19}\text{F}$  NMR (CDCl<sub>3</sub>) spectrum of HC<sub>6</sub>F<sub>4</sub>O-(R)-2-Octyl.

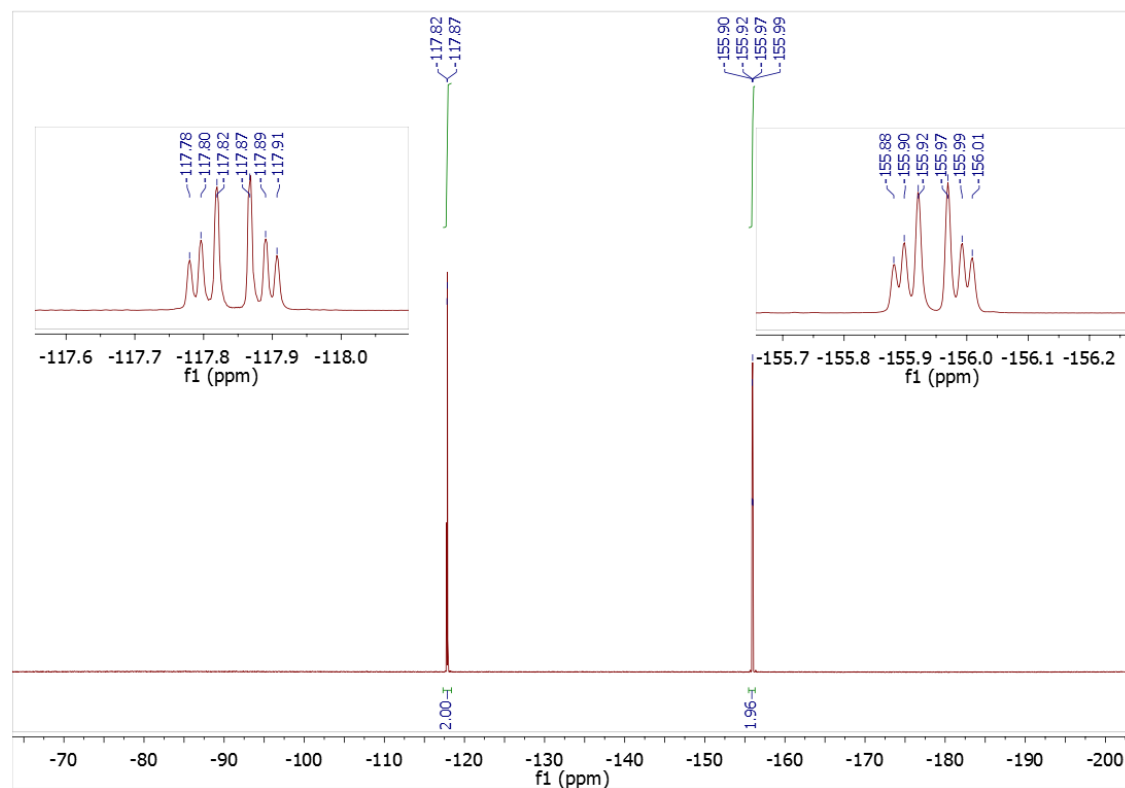

**Figure S20:**  $^{19}\text{F}$  NMR (CDCl<sub>3</sub>) spectrum of **1**.

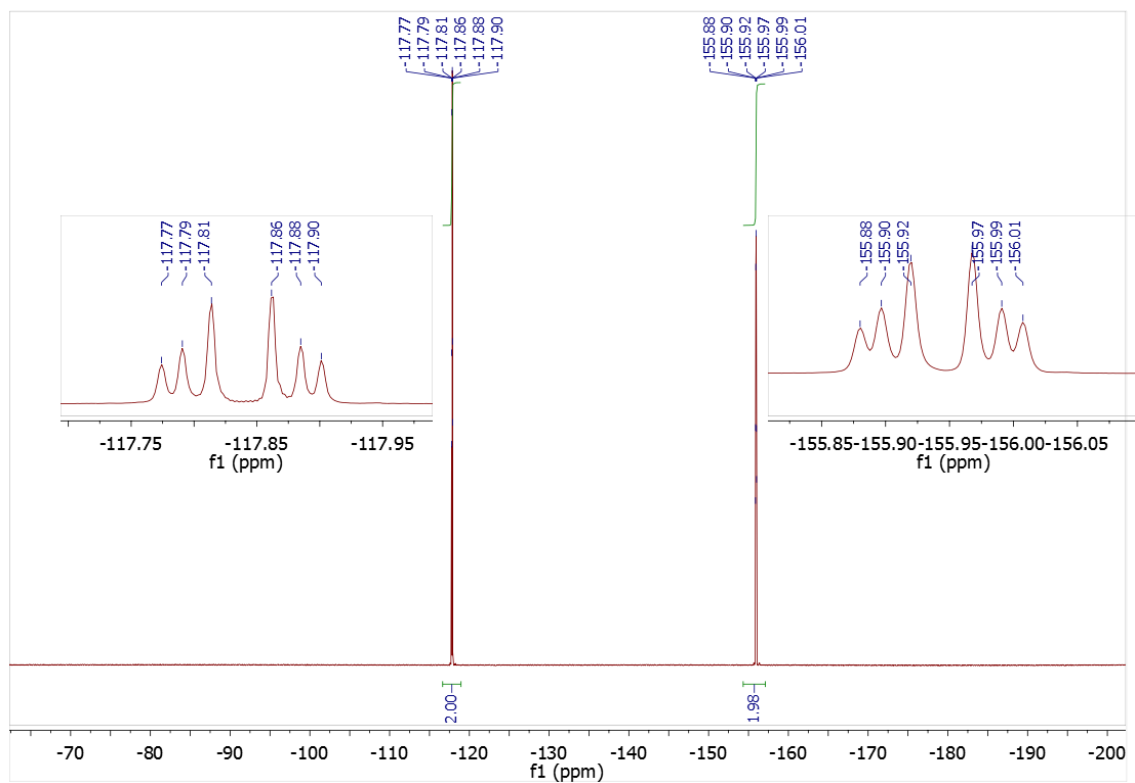

**Figure S21:**  $^{19}\text{F}$  NMR ( $\text{CDCl}_3$ ) spectrum of **2**.

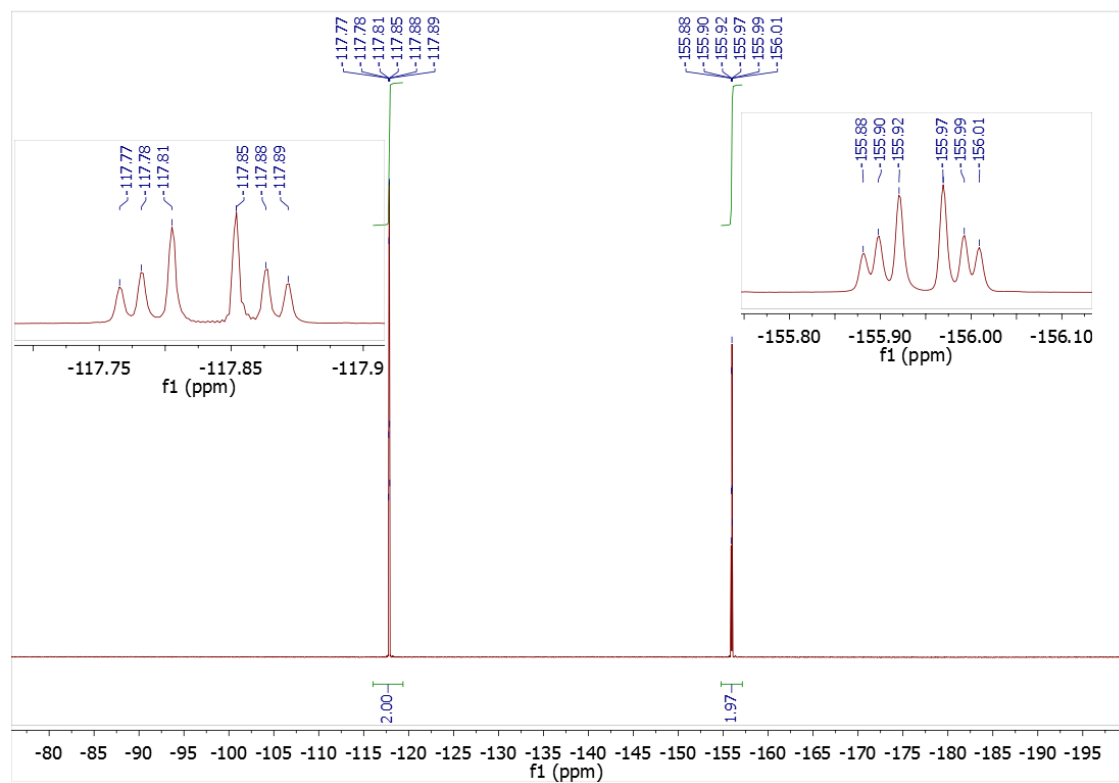

**Figure S22:**  $^{19}\text{F}$  NMR ( $\text{CDCl}_3$ ) spectrum of **3**.

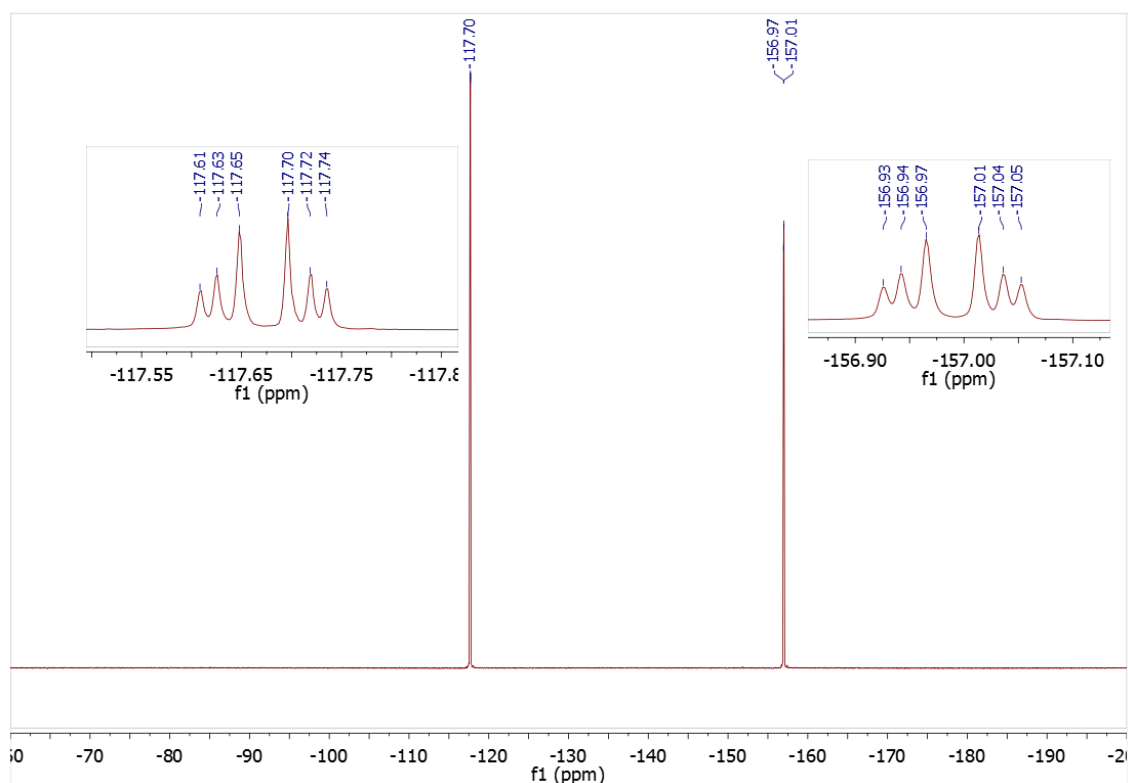

**Figure S23:**  $^{19}\text{F}$  NMR ( $\text{CDCl}_3$ ) spectrum of **4**.

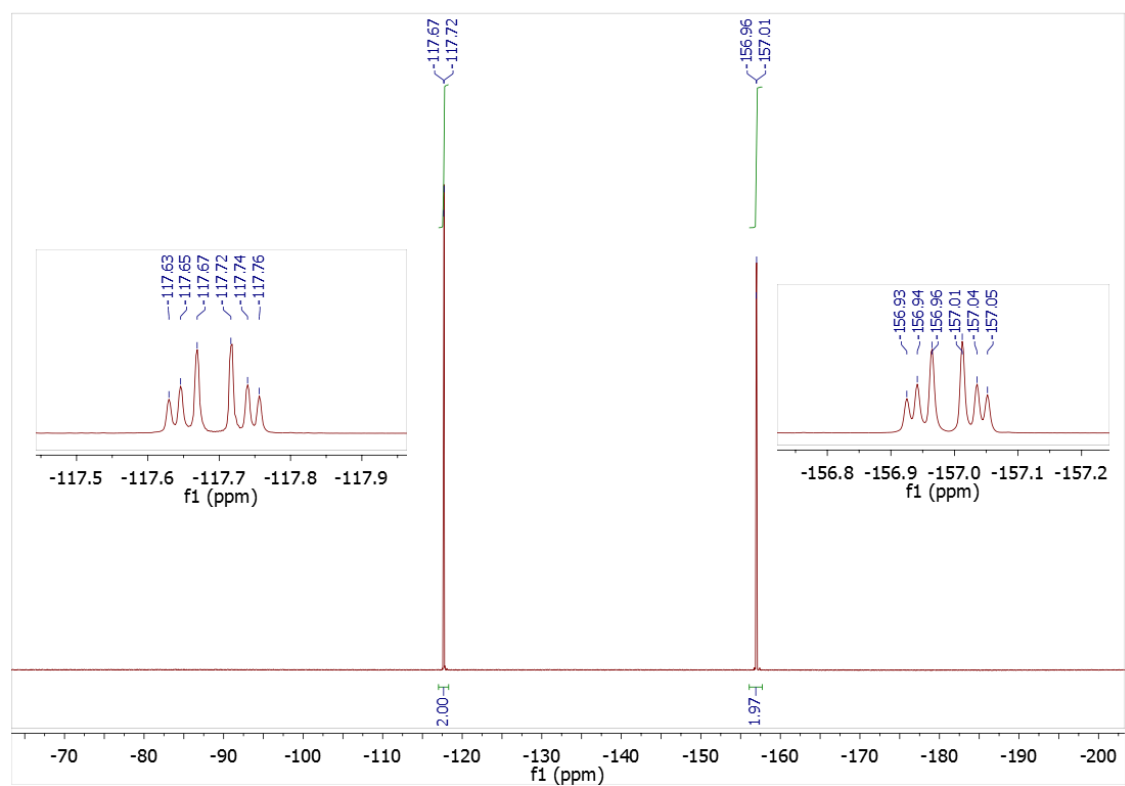

**Figure S24:**  $^{19}\text{F}$  NMR ( $\text{CDCl}_3$ ) spectrum of **5**.

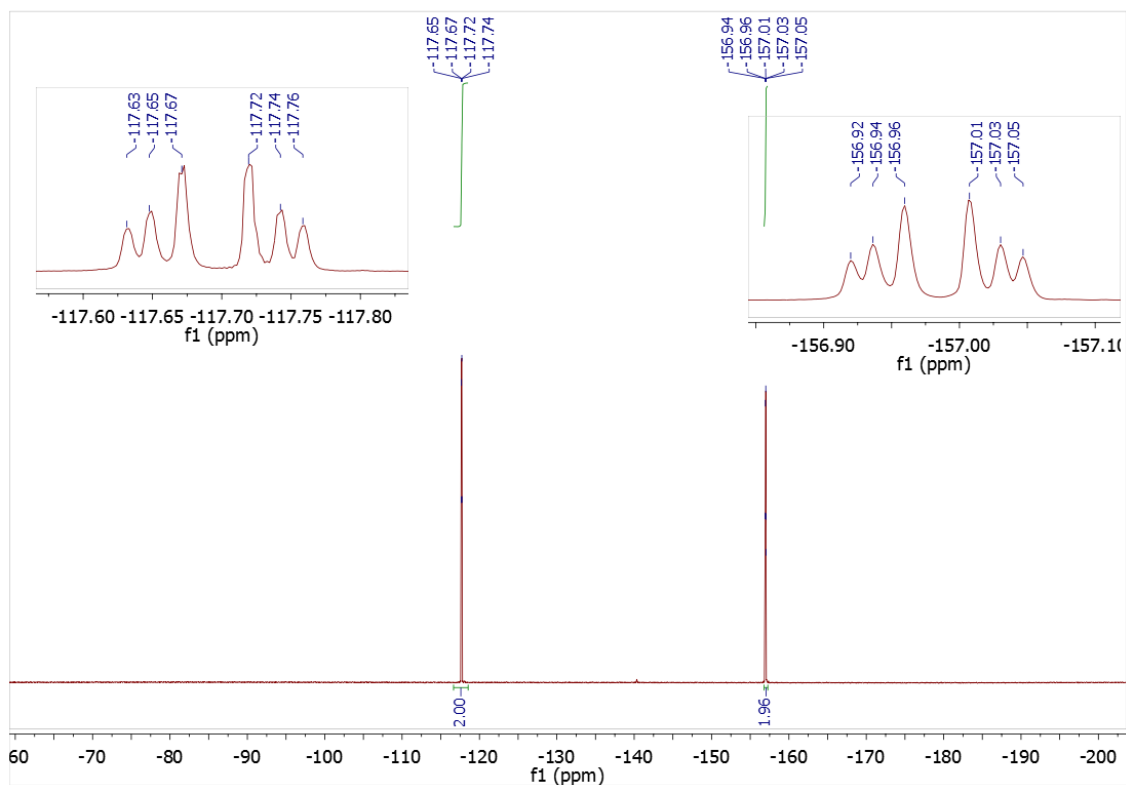

**Figure S25:**  $^{19}\text{F}$  NMR ( $\text{CDCl}_3$ ) spectrum of **6**.

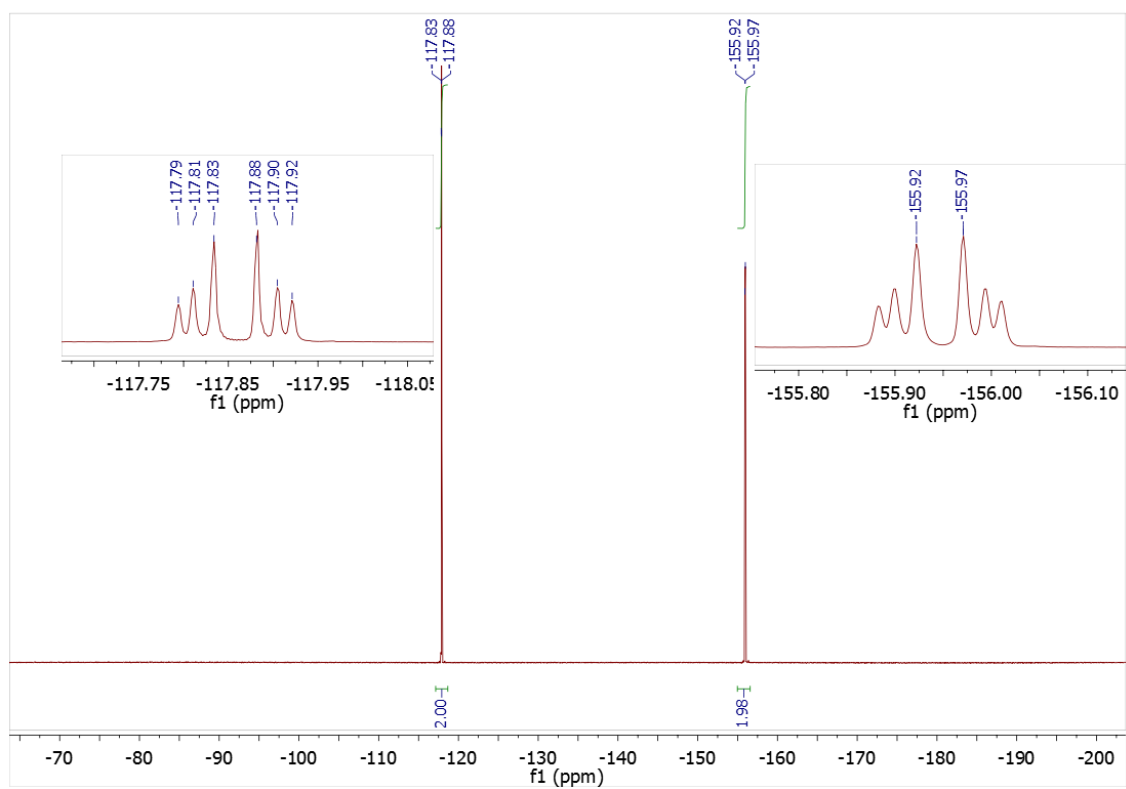

**Figure S26:**  $^{19}\text{F}$  NMR ( $\text{CDCl}_3$ ) spectrum of **7**.

## MALDI-TOF MS

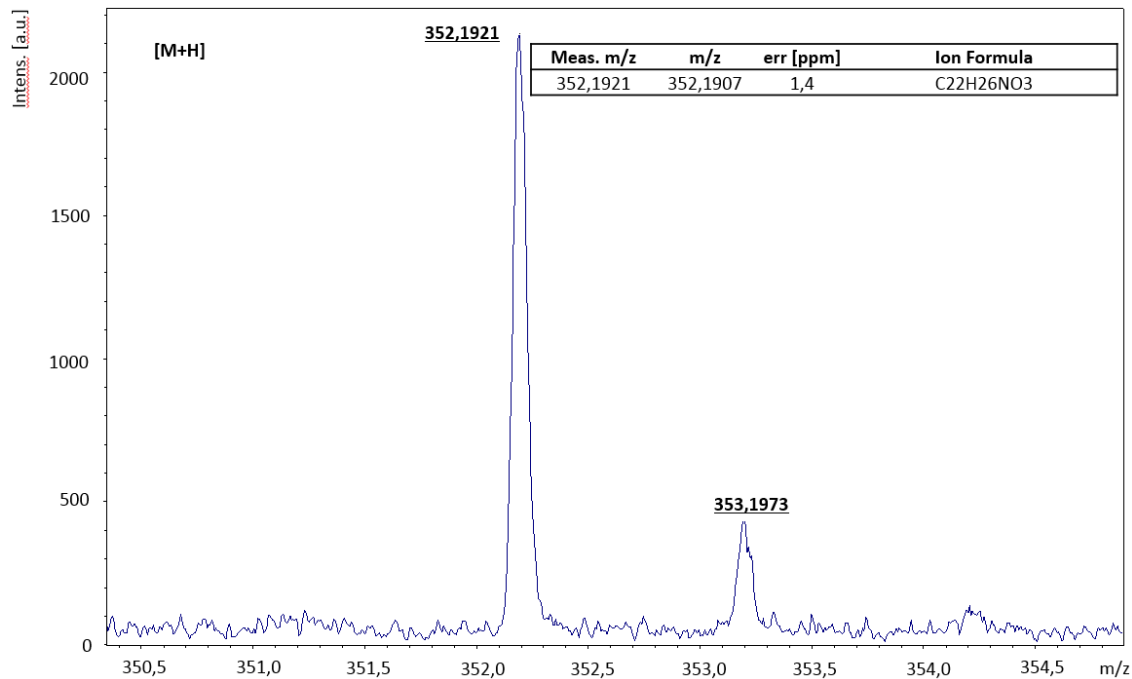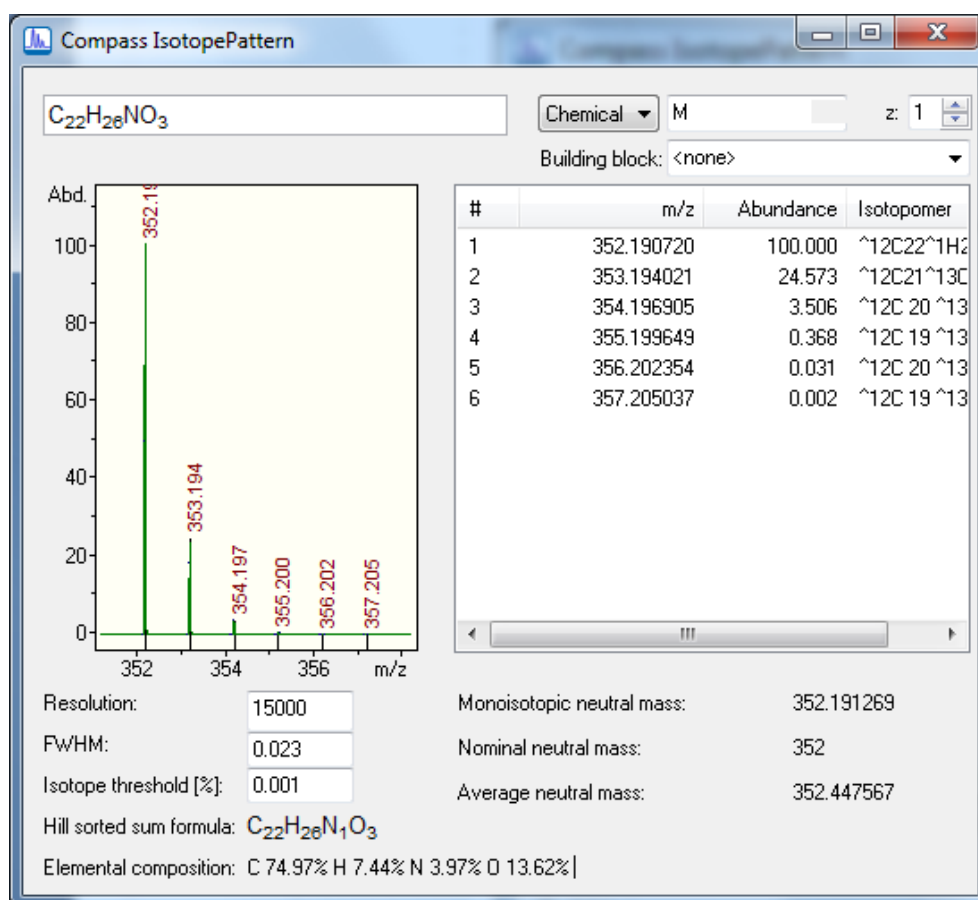

**Figure S27:** MALDI-TOF mass spectrum and simulated isotopic pattern of CN8\*.

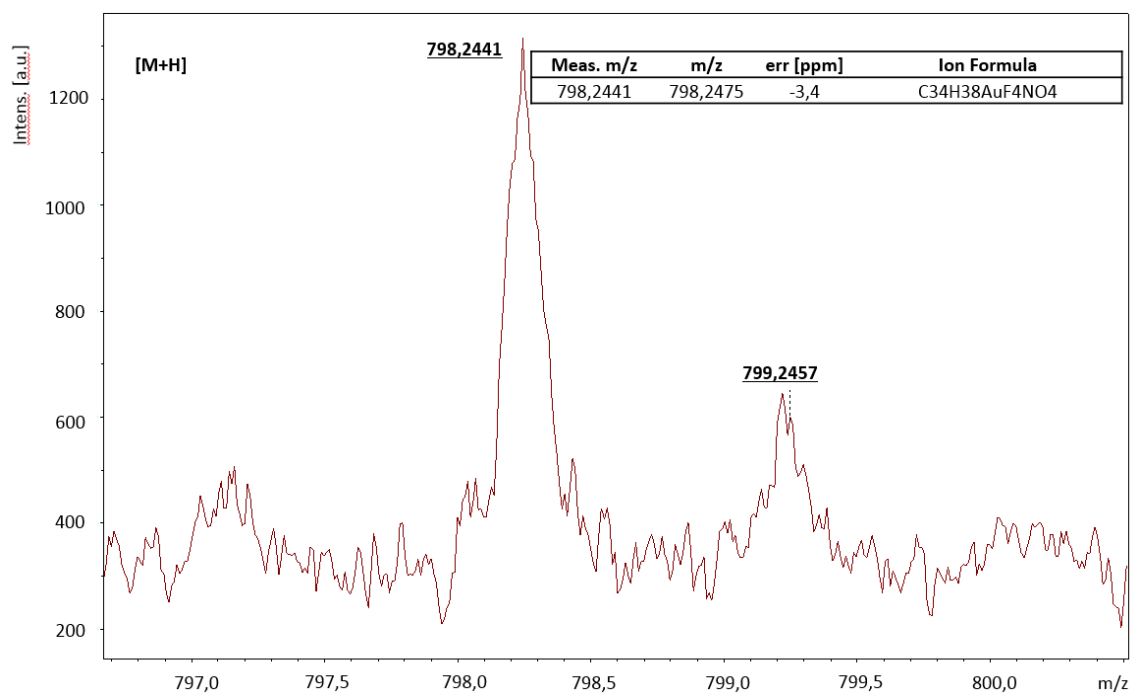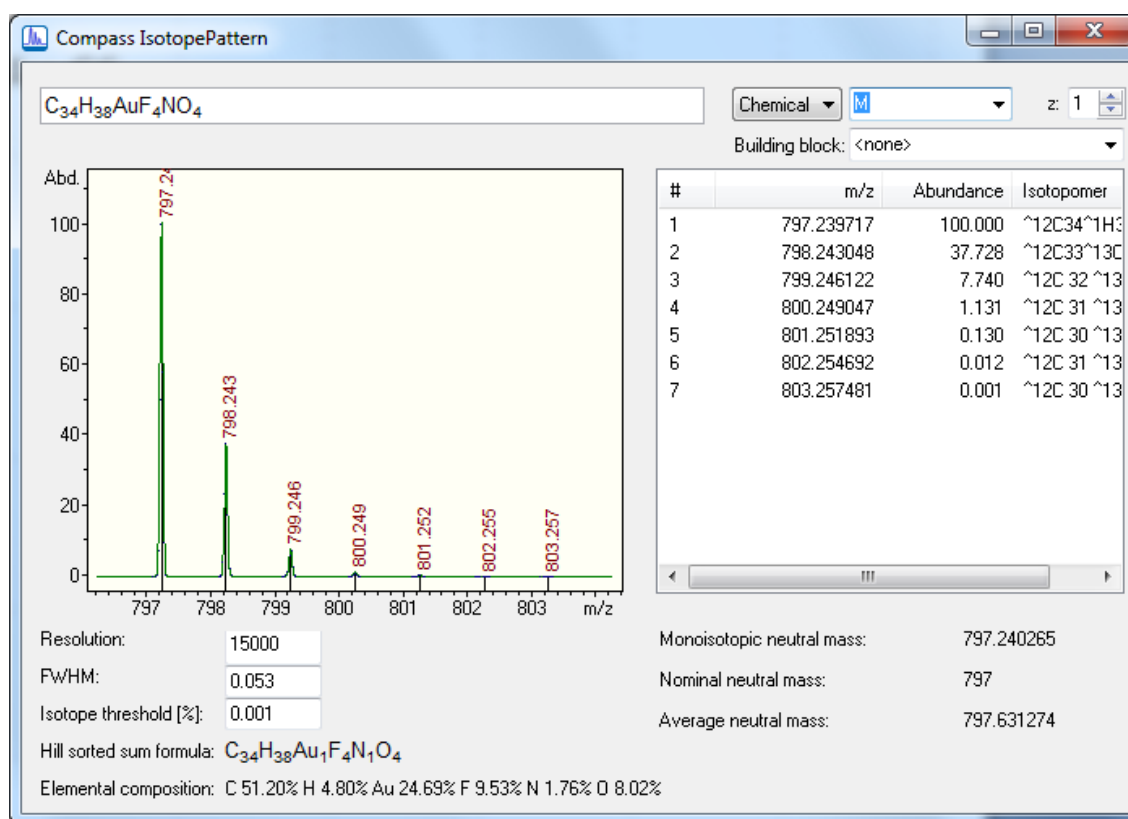

**Figure S28:** MALDI-TOF mass spectrum and simulated isotopic pattern of **1**.

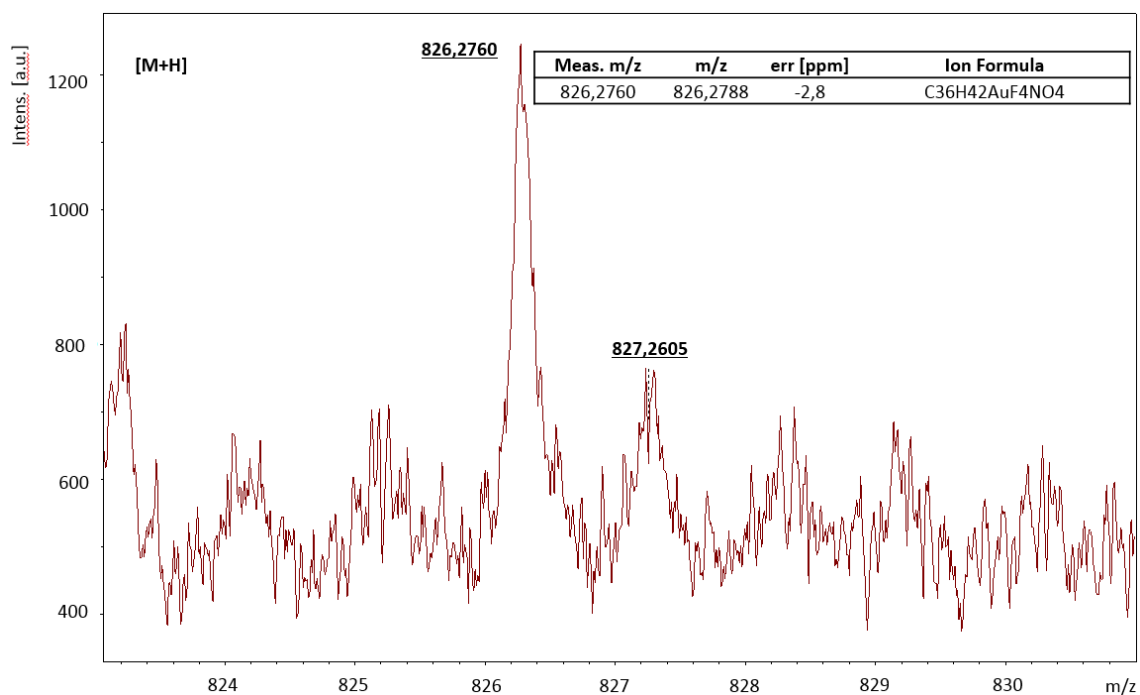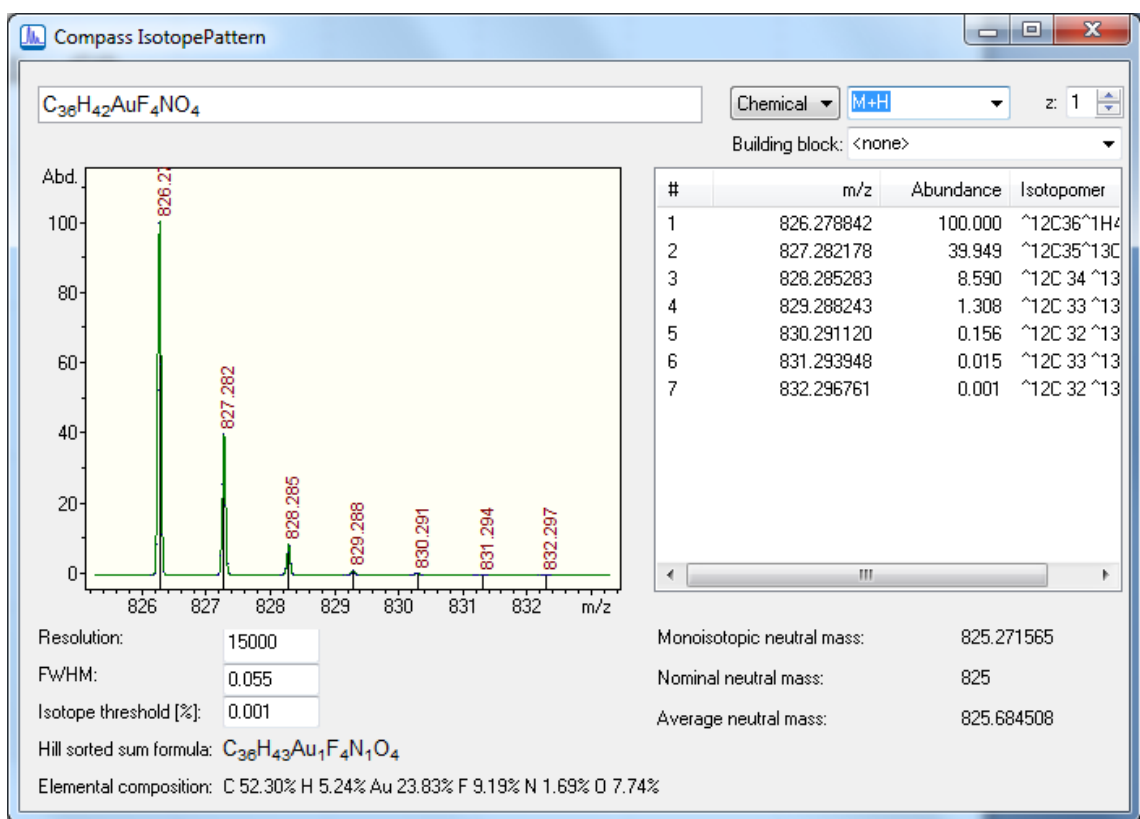

**Figure S29:** MALDI-TOF mass spectrum and simulated isotopic pattern of **2**.

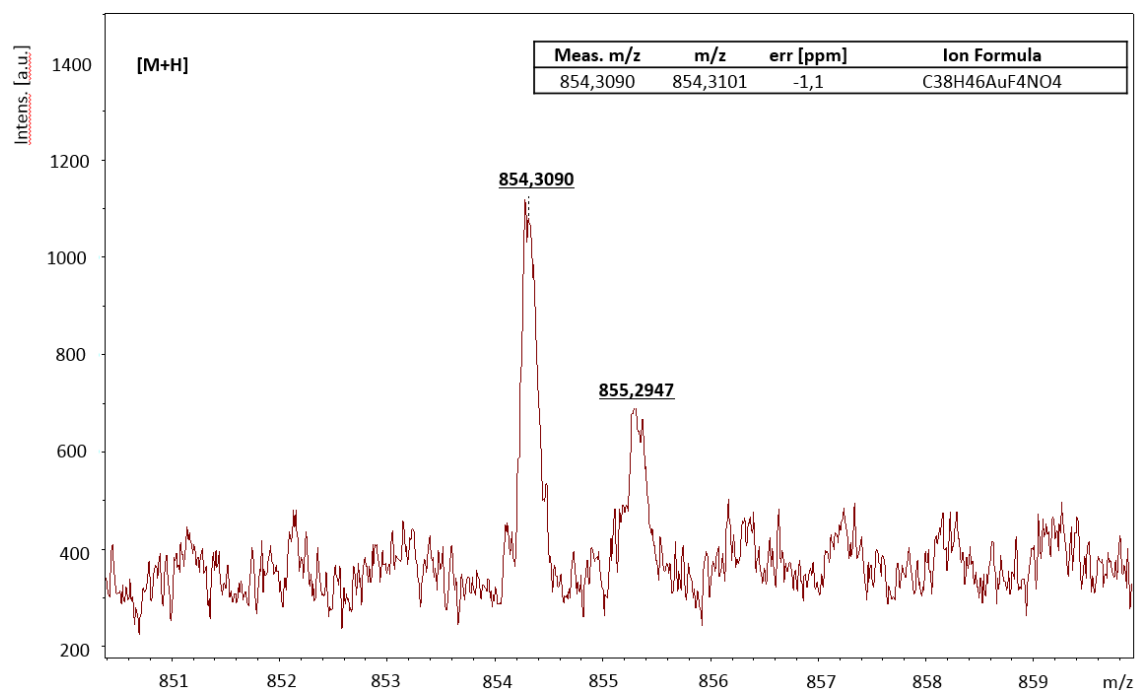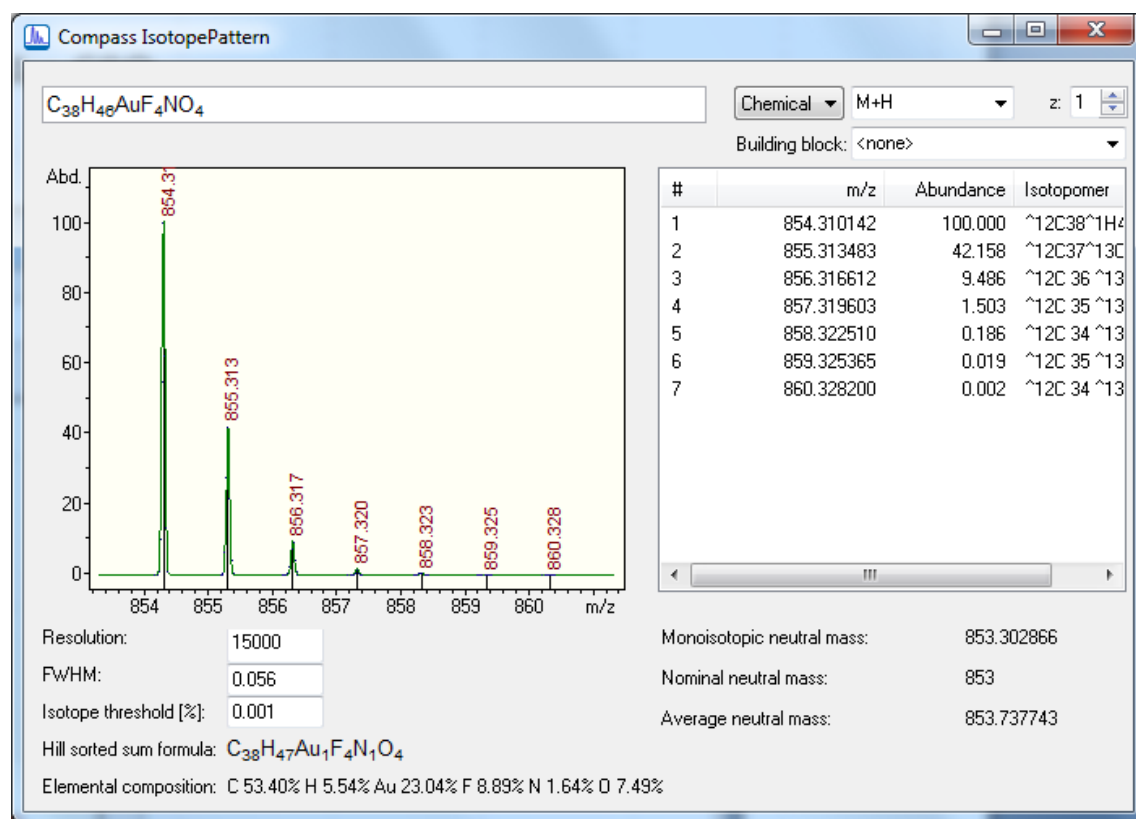

**Figure S30:** MALDI-TOF mass spectrum and simulated isotopic pattern of **3**.

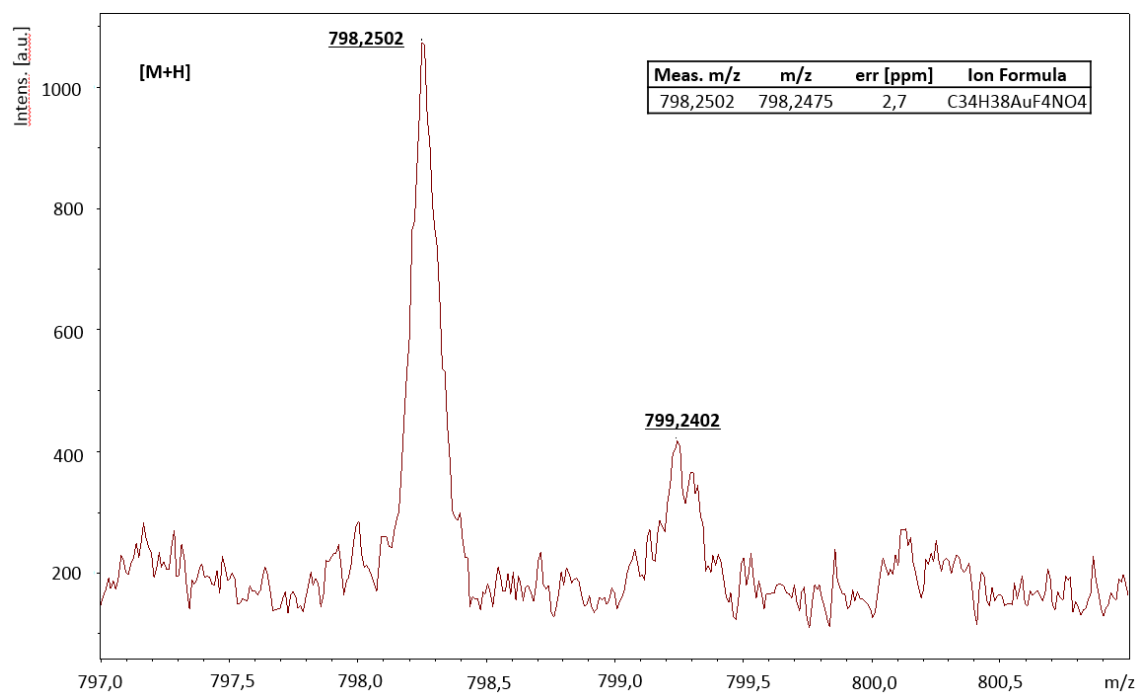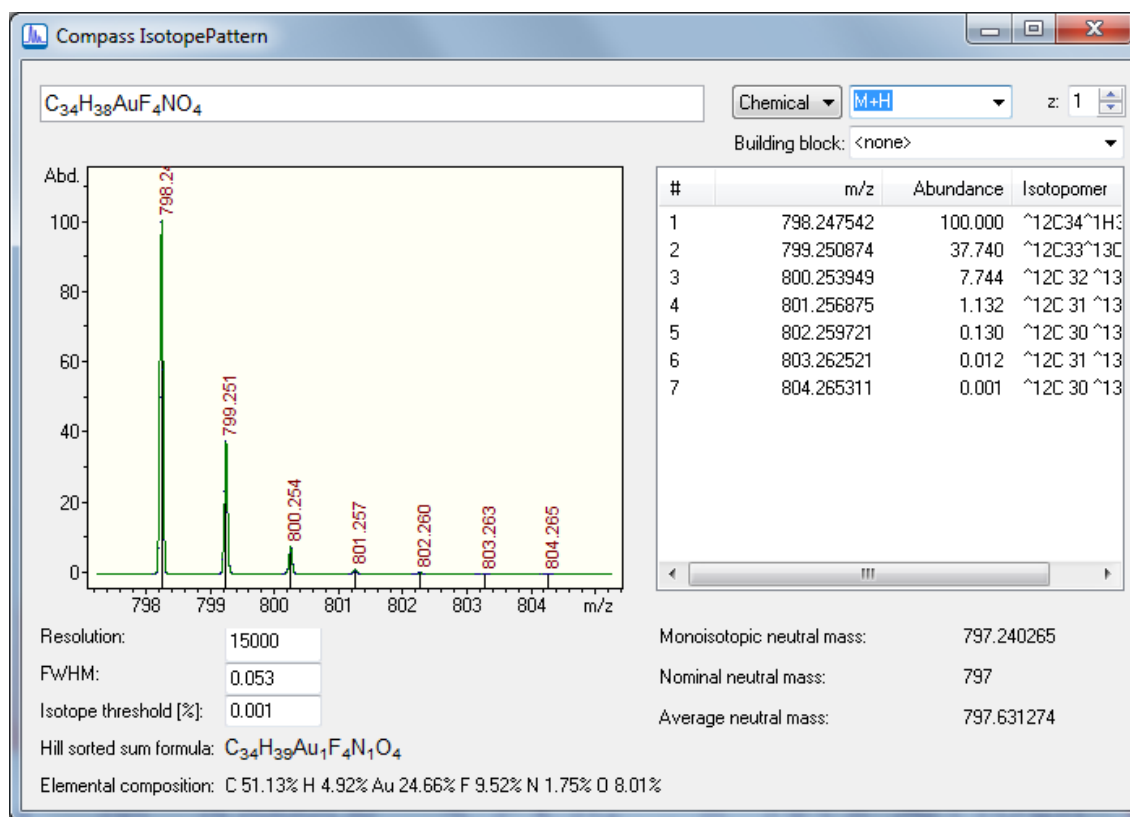

**Figure S31:** MALDI-TOF mass spectrum and simulated isotopic pattern of **4**.

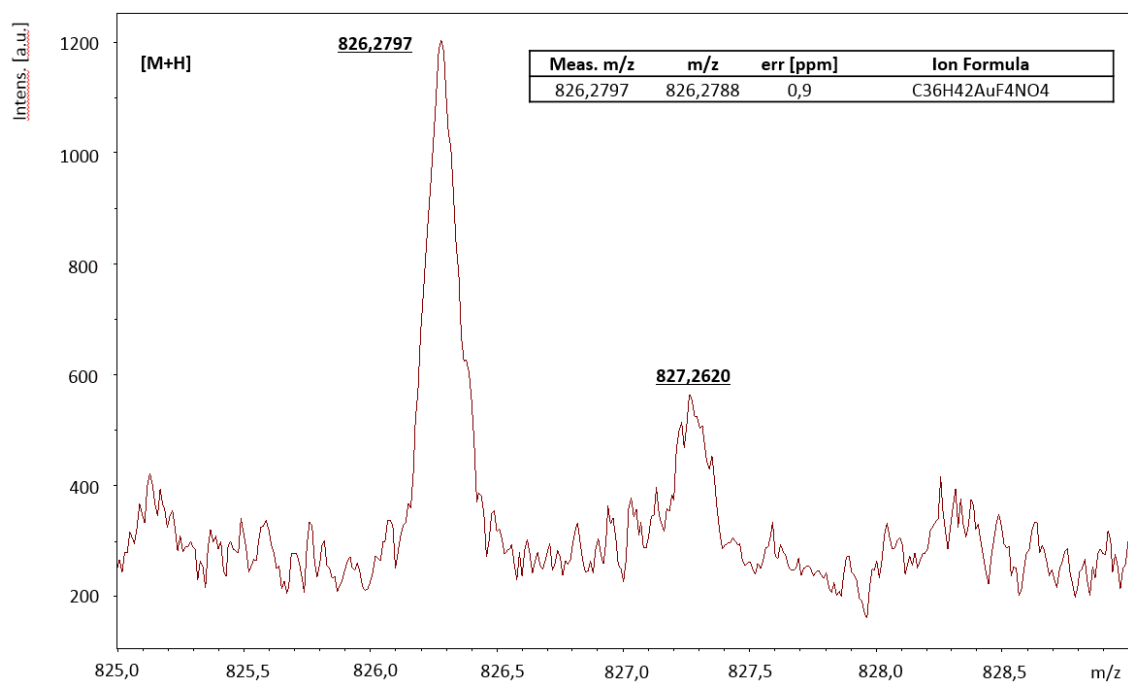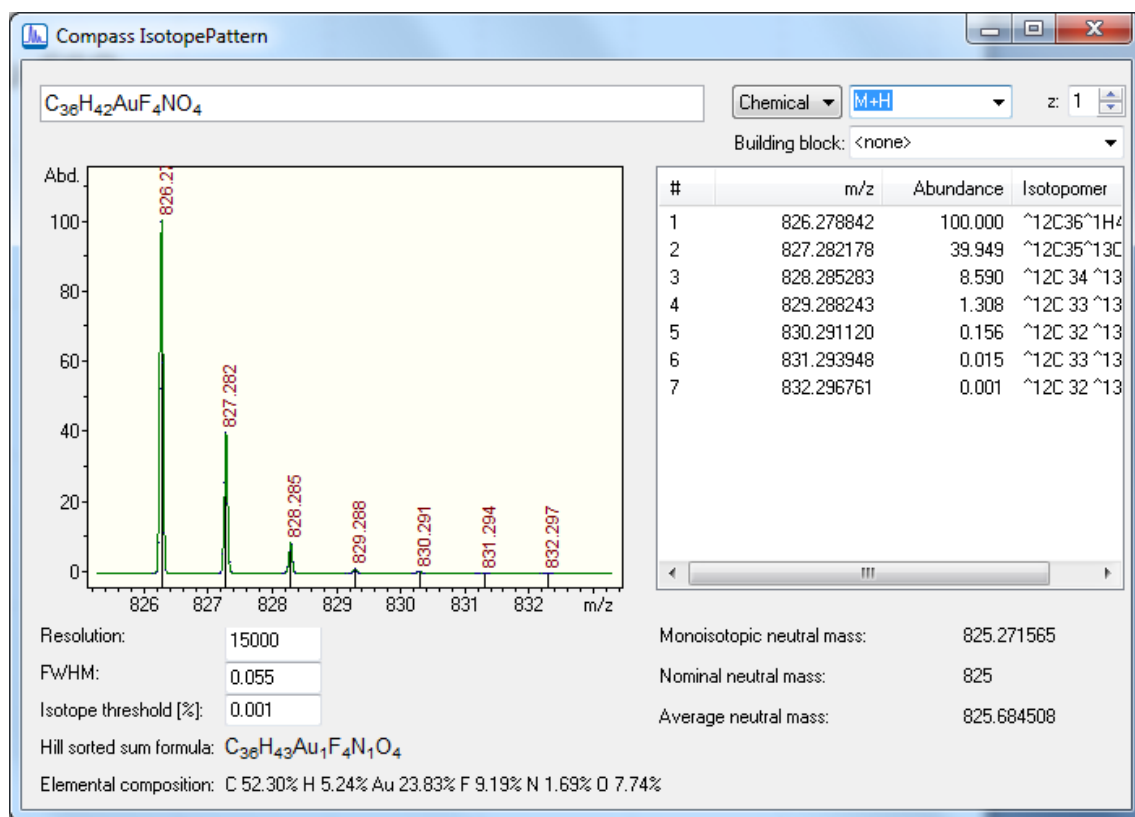

**Figure S32:** MALDI-TOF mass spectrum and simulated isotopic pattern of **5**.

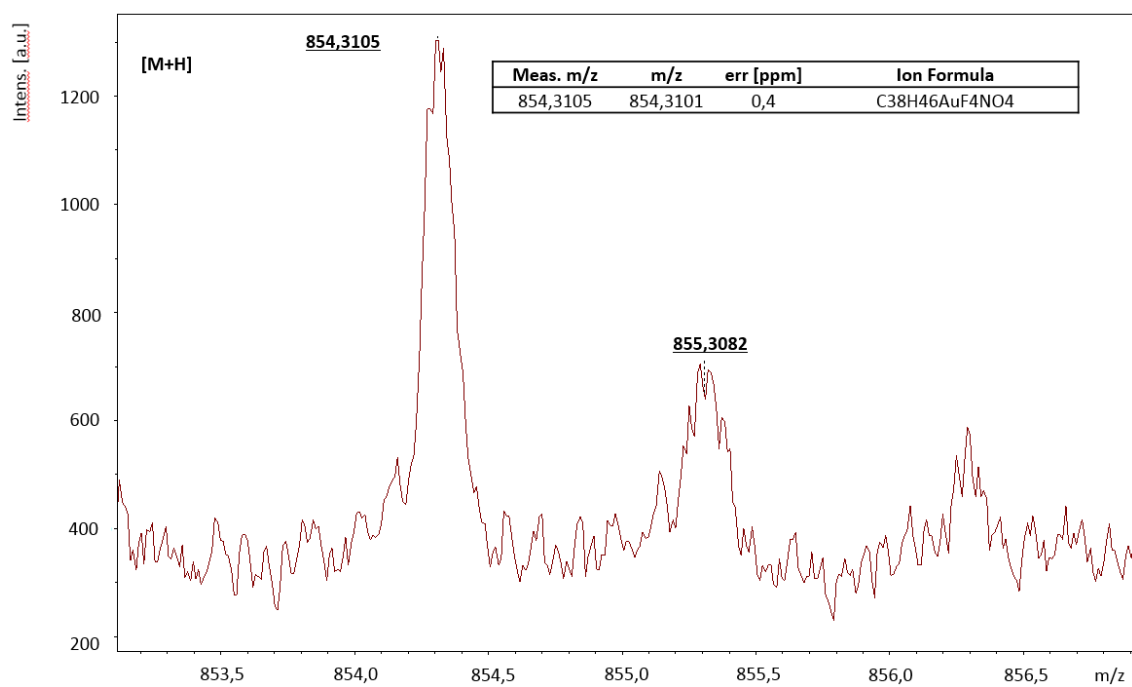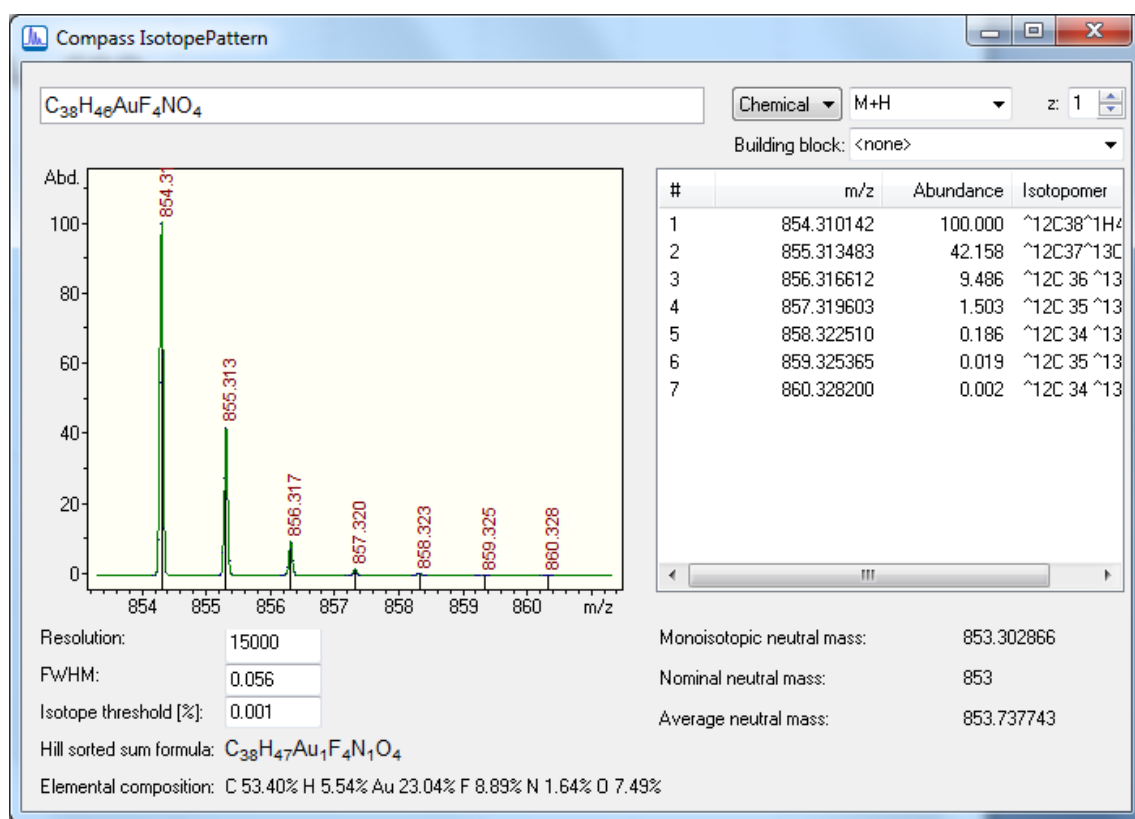

**Figure S33:** MALDI-TOF mass spectrum and simulated isotopic pattern of **6**.

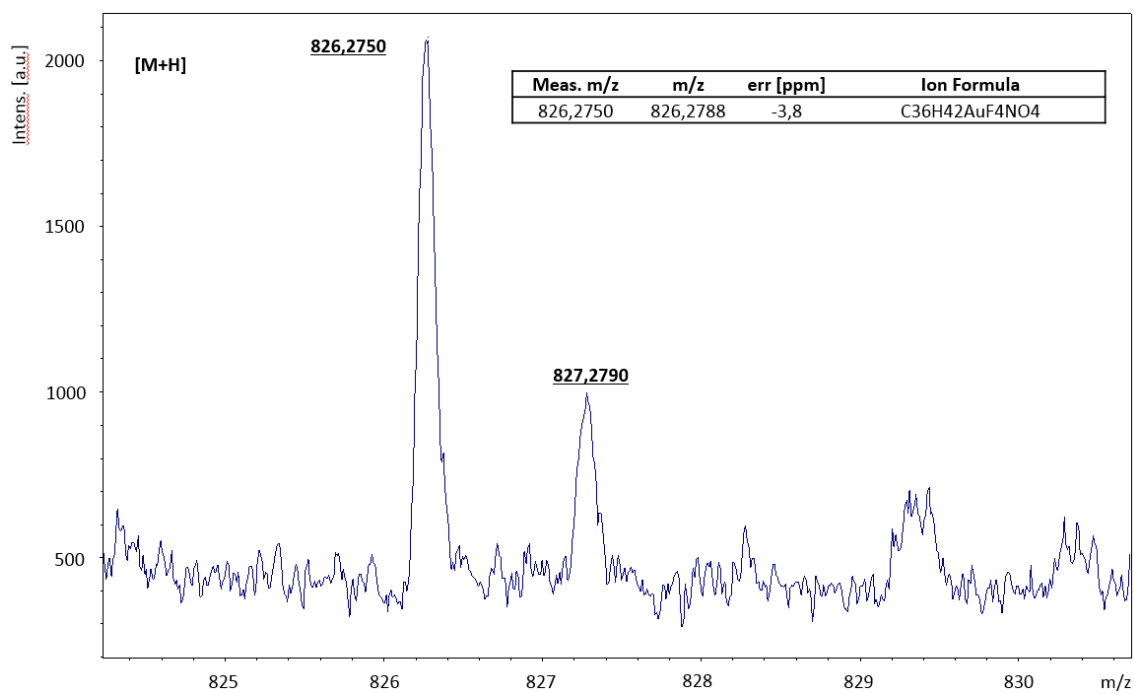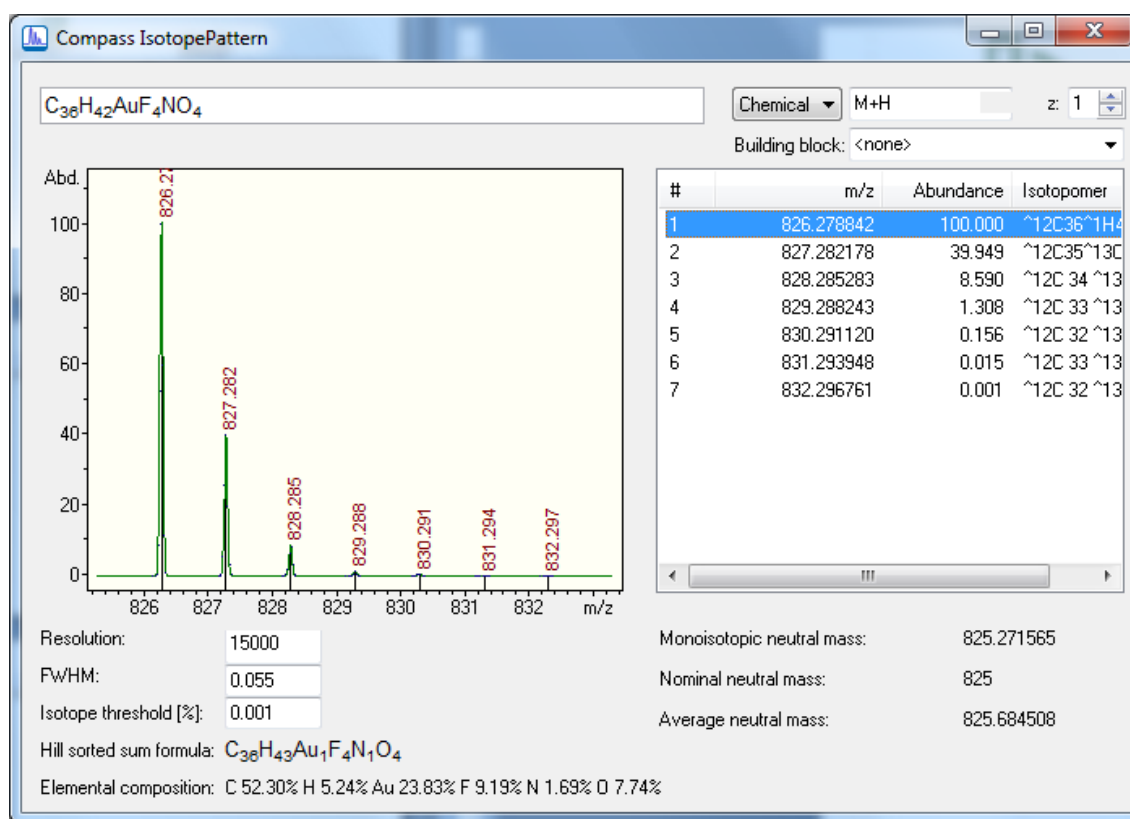

**Figure S34:** MALDI-TOF mass spectrum and simulated isotopic pattern of 7.

## POM textures

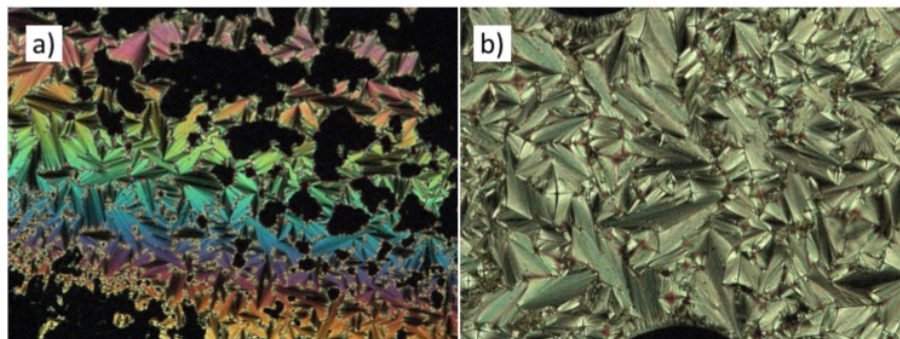

**Figure S35.** Polarized optical microscopic texture (x100, crossed polarizers) of the SmA phase observed upon cooling from the isotropic liquid of (a) **1** at 150 °C, (b) **5** at 130°C.

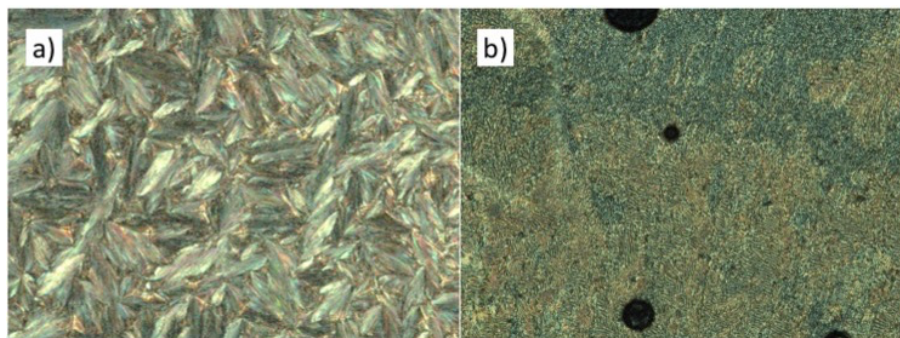

**Figure S36.** Polarized optical microscopic texture (x100, crossed polarizers) of the SmC\* phase observed upon cooling from a SmA mesophase of (a) **2** at 118 °C, (b) **6** at 88°C.

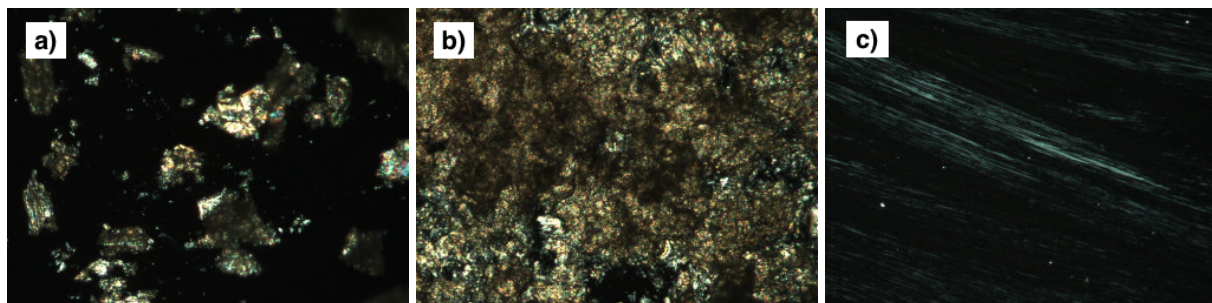

**Figure S37.** POM textures (x100, crossed polarizers) observed for **2** at 25 °C. a) virgin crystalline sample; b) sandy-like texture obtained by grinding the sample under a cover glass; c) “grayish texture” obtained by shearing the sample without a cover glass.

DSC scans. From top to bottom: first heating, first cooling, second heating.

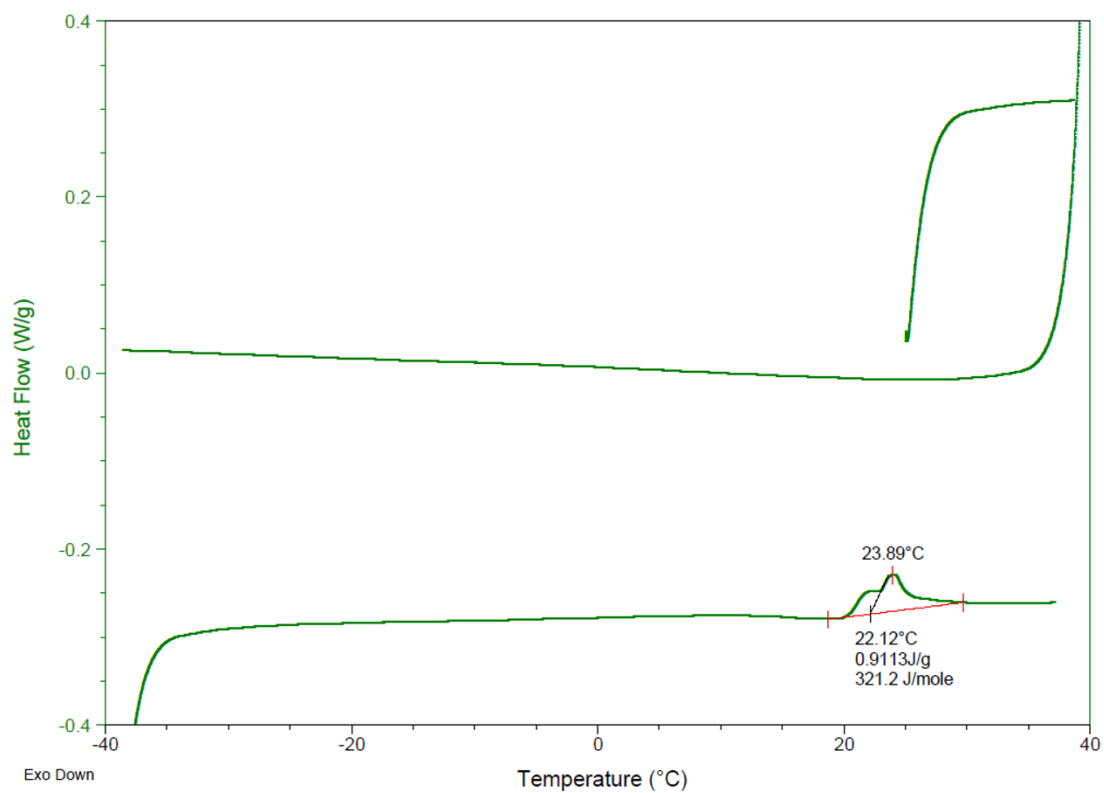

Figure S38: DSC scans of CN8\*.

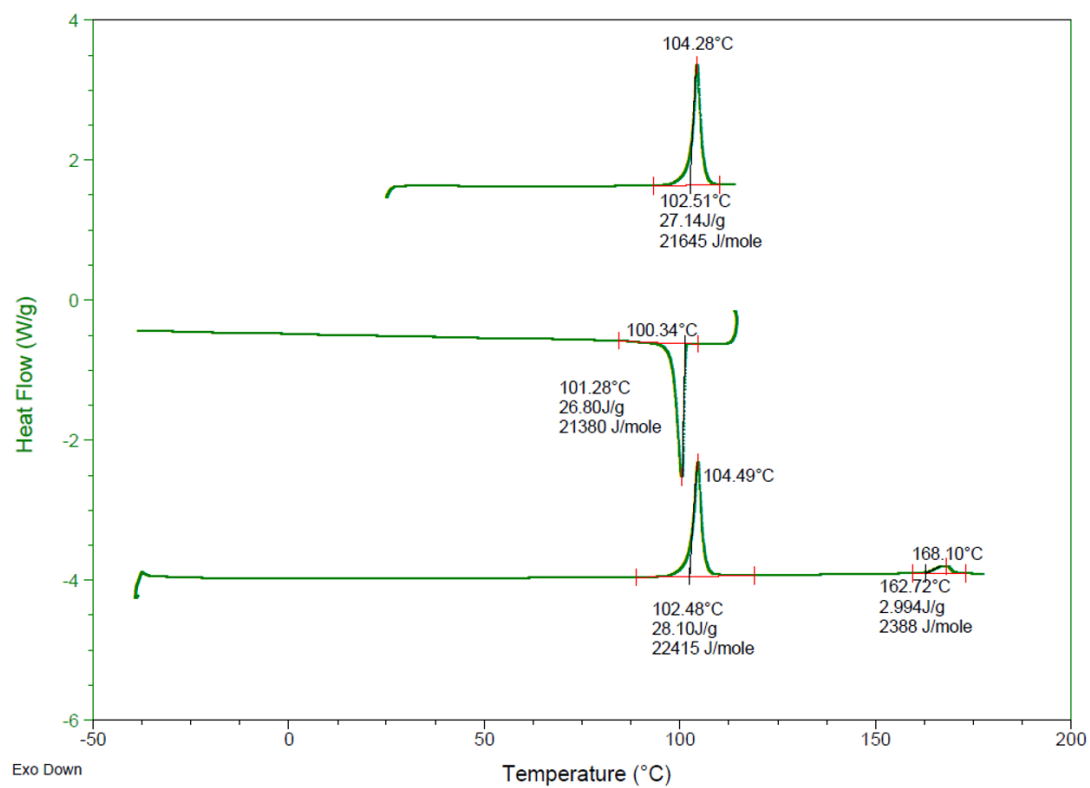

Figure S39: DSC scans of 1.



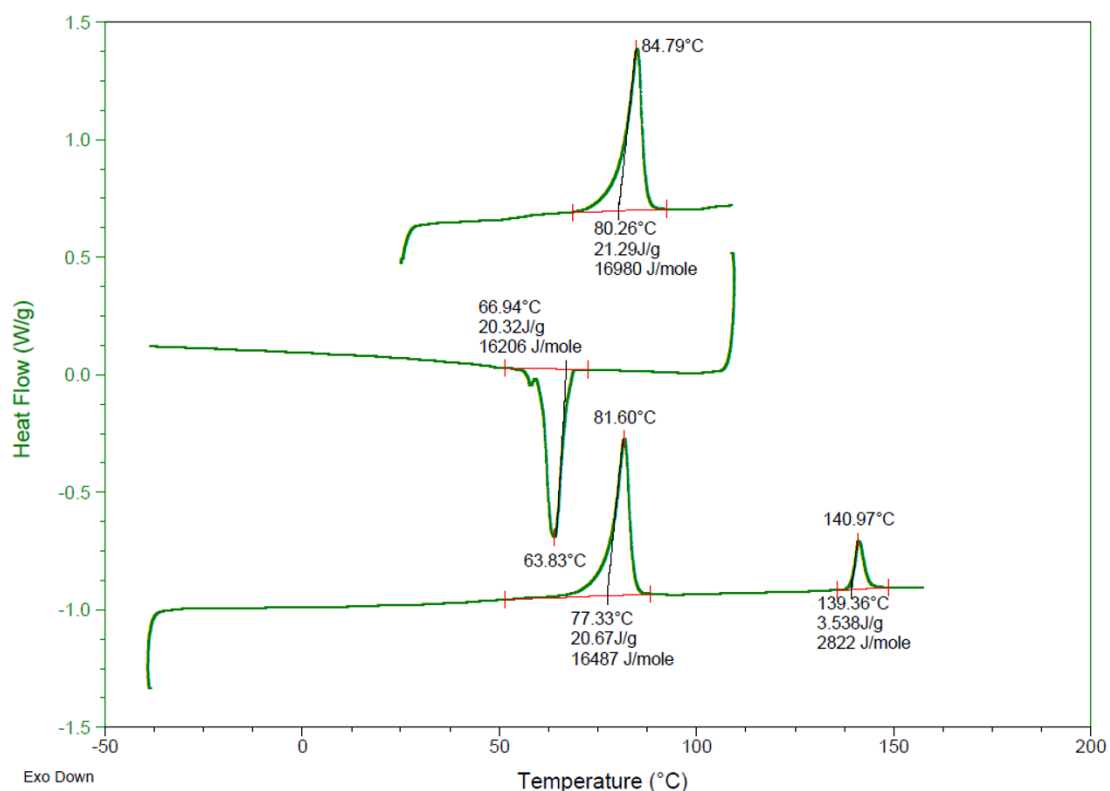

Figure S42: DSC scans of 4.

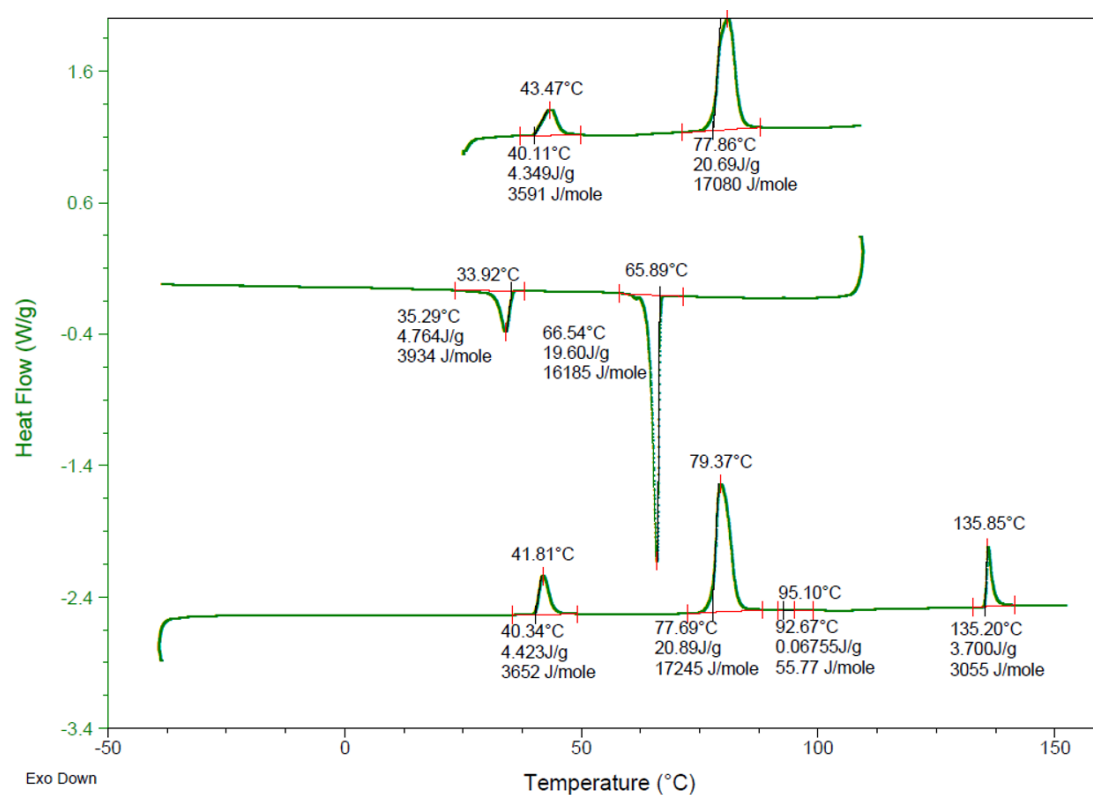

Figure S43: DSC scans of 5.

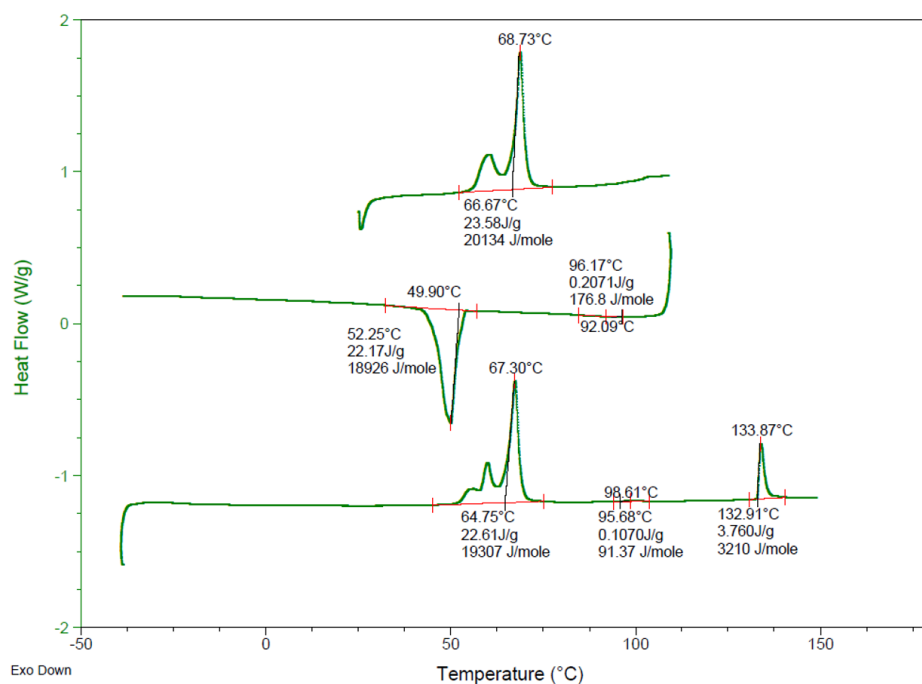

Figure S44: DSC scans of 6.

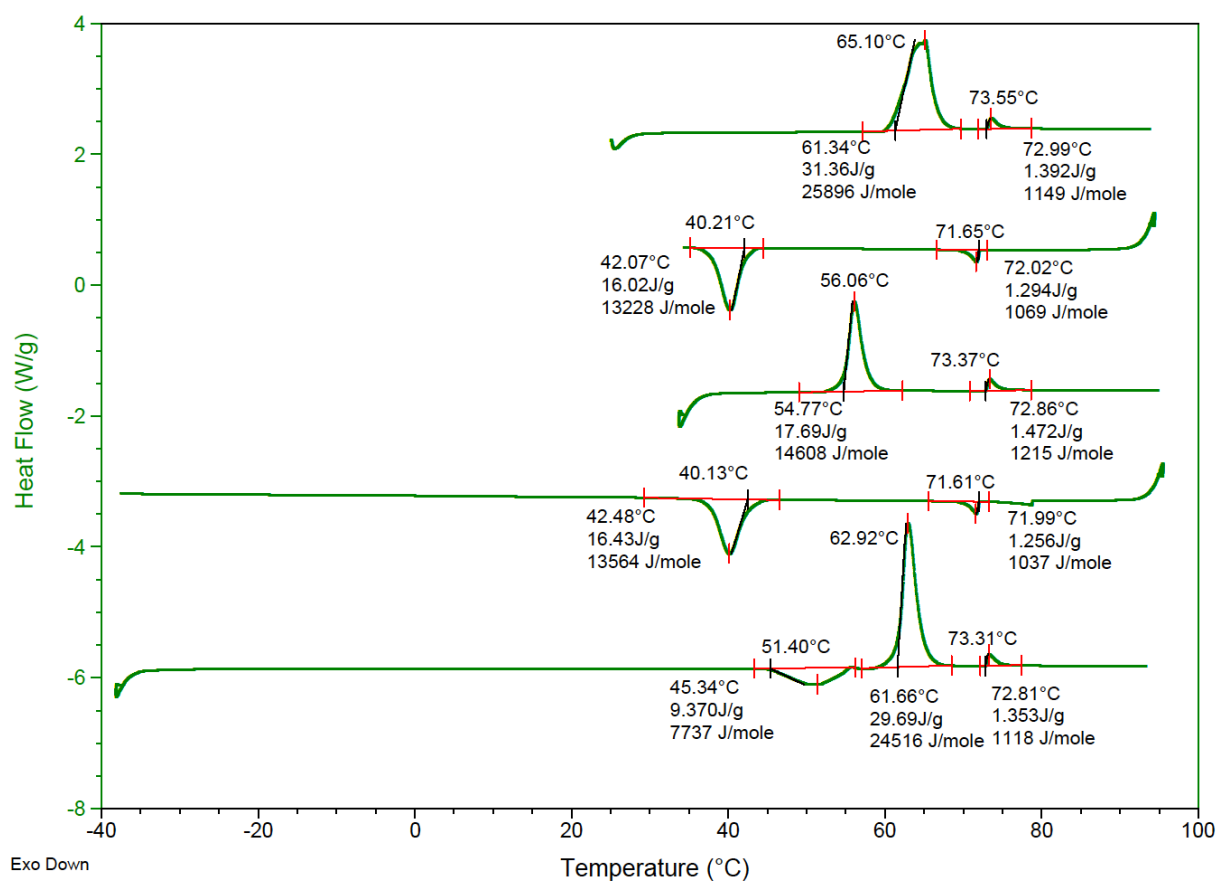

Figure S45: DSC scans of 7.

## UV-Visible and luminescence data

**Table S1.** UV-Visible and luminescence data for the free isocyanides, and for their metal complexes **1-7**, in dichloromethane solution at 298 K ( $10^{-5}$  M).

| Compound <sup>a</sup> | $\lambda$ /nm ( $\epsilon/ 10^3 \text{ M}^{-1} \text{ cm}^{-1}$ ) | $\lambda_{\text{max, ex}}$ /nm | $\lambda_{\text{max, em}}$ /nm | $\tau_{\text{av}}$ <sup>b</sup> /(ns) | $\tau_n$ <sup>c</sup> ; $A_n$ <sup>d</sup>                         |
|-----------------------|-------------------------------------------------------------------|--------------------------------|--------------------------------|---------------------------------------|--------------------------------------------------------------------|
| <b>CN6</b>            | 267 (25.5)                                                        | 291                            | 374                            | 6.75                                  | $\tau_1 = 1.19$ ; $A_1 = 31.65$<br>$\tau_2 = 7.17$ ; $A_2 = 68.35$ |
| <b>CN8</b>            | 267 (26.4)                                                        | 294                            | 373                            | 7.96                                  | $\tau_1 = 1.31$ ; $A_1 = 37.84$<br>$\tau_2 = 8.59$ ; $A_2 = 62.16$ |
| <b>CN10</b>           | 267 (7.7)                                                         | 296                            | 377                            | 6.80                                  | $\tau_1 = 1.40$ ; $A_1 = 31.53$<br>$\tau_2 = 7.29$ ; $A_2 = 68.47$ |
| <b>CN8*</b>           | 269 (24.6)                                                        | 295                            | 378                            | 6.02                                  | $\tau_1 = 1.07$ ; $A_1 = 38.73$<br>$\tau_2 = 6.54$ ; $A_2 = 61.27$ |
| <b>1</b>              | 279 (51.1)                                                        | 304                            | 378                            | 3.92                                  | $\tau_1 = 0.62$ ; $A_1 = 33.33$<br>$\tau_2 = 4.17$ ; $A_2 = 66.67$ |
| <b>2</b>              | 279 (52.2)                                                        | 305                            | 379                            | 5.13                                  | $\tau_1 = 0.96$ ; $A_1 = 42.83$<br>$\tau_2 = 5.66$ ; $A_2 = 57.17$ |
| <b>3</b>              | 279 (53.3)                                                        | 306                            | 379                            | 4.96                                  | $\tau_1 = 0.92$ ; $A_1 = 39.43$<br>$\tau_2 = 5.41$ ; $A_2 = 60.57$ |
| <b>4</b>              | 280 (52.8)                                                        | 305                            | 375                            | 3.22                                  | $\tau_1 = 0.64$ ; $A_1 = 40.29$<br>$\tau_2 = 3.53$ ; $A_2 = 59.71$ |
| <b>5</b>              | 280 (53.3)                                                        | 305                            | 377                            | 5.01                                  | $\tau_1 = 1.23$ ; $A_1 = 32.32$<br>$\tau_2 = 5.42$ ; $A_2 = 67.68$ |
| <b>6</b>              | 280 (53.1)                                                        | 306                            | 378                            | 4.82                                  | $\tau_1 = 0.84$ ; $A_1 = 41.35$<br>$\tau_2 = 5.27$ ; $A_2 = 58.65$ |
| <b>7</b>              | 280 (49.0)                                                        | 307                            | 384                            | 6.88                                  | $\tau_1 = 0.91$ ; $A_1 = 37.74$<br>$\tau_2 = 7.29$ ; $A_2 = 68.26$ |

<sup>a</sup> The isocyanides are labeled as CN followed by the number of carbons of the alkoxy substituent.

<sup>b</sup> Average lifetime  $\tau_{\text{av}} = (A_1\tau_1^2 + A_2\tau_2^2 + \dots) / ((A_1\tau_1 + A_2\tau_2 + \dots))$ . <sup>c</sup>  $\tau_n$  = Natural lifetime. <sup>d</sup>  $A_n$  = Intensity coefficients

**UV-Visible spectra in dichloromethane solution ( $10^{-5}$  M)**

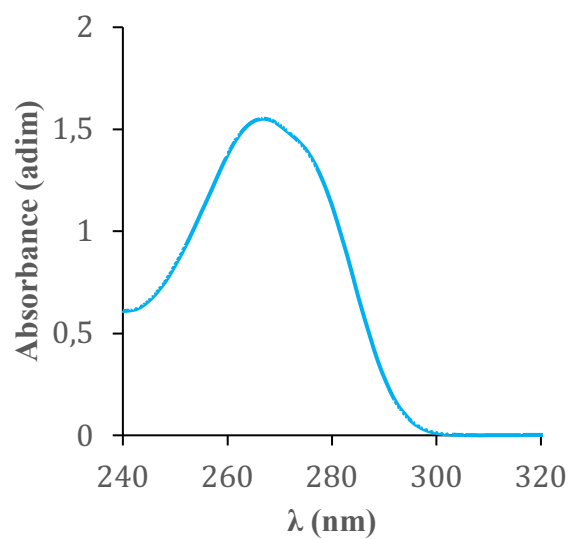

**Figure S46.** UV-Visible spectra of **CN6**

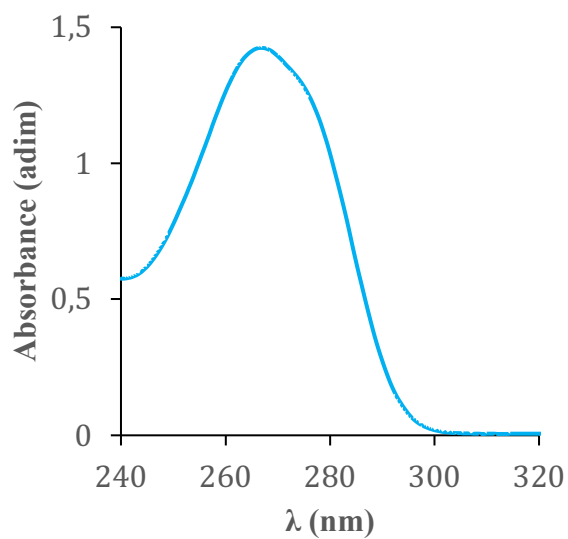

**Figure S47.** UV-Visible spectra of **CN8**

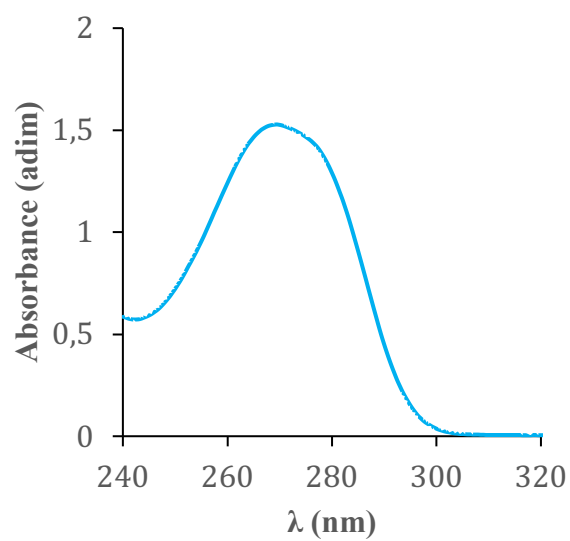

**Figure S48.** UV-Visible spectra of **CN8\***

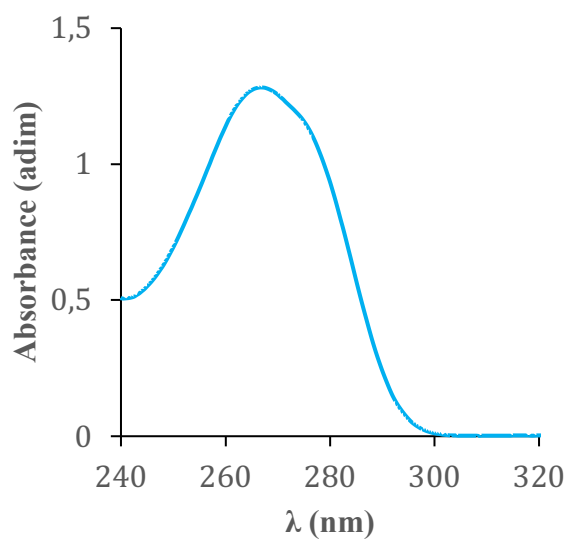

**Figure S49.** UV-Visible spectra of **CN10**

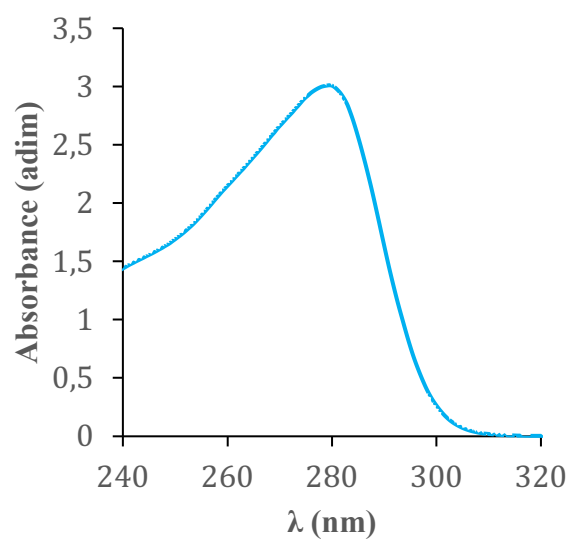

**Figure S50.** UV-Visible spectra of **1**

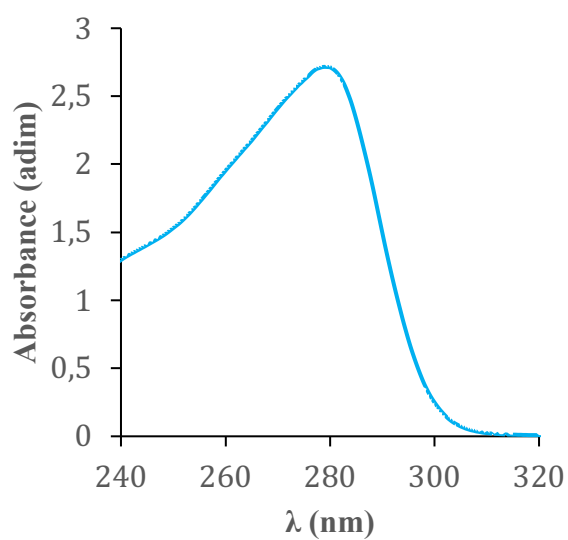

**Figure S51.** UV-Visible spectra of **2**

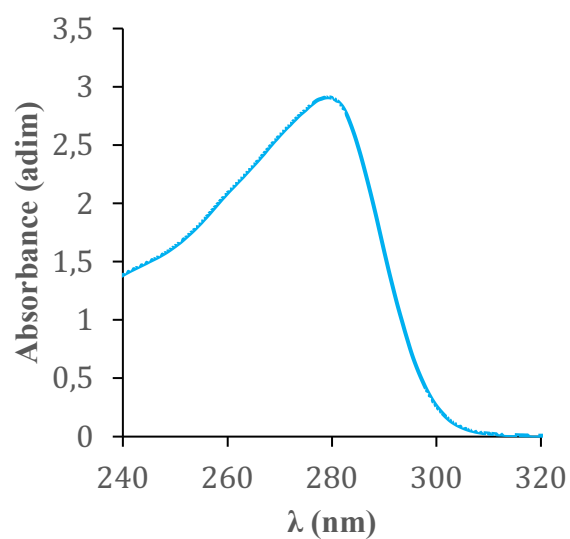

**Figure S52.** UV-Visible spectra of **3**

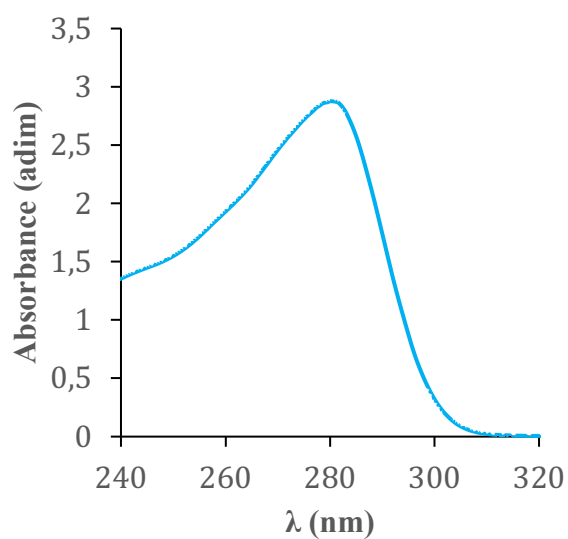

**Figure S53.** UV-Visible spectra of **4**

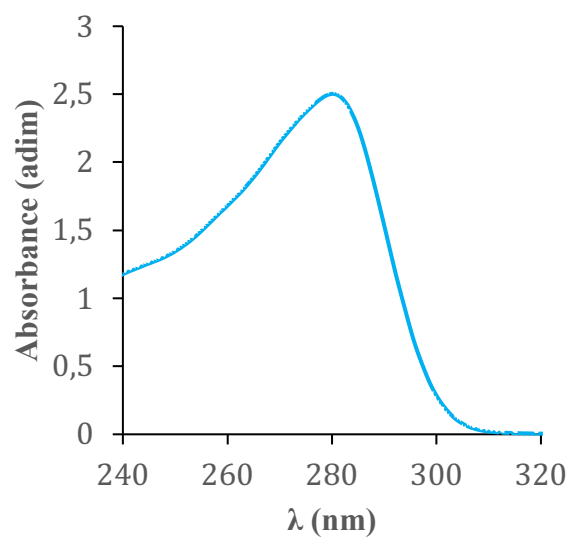

**Figure S54.** UV-Visible spectra of **5**

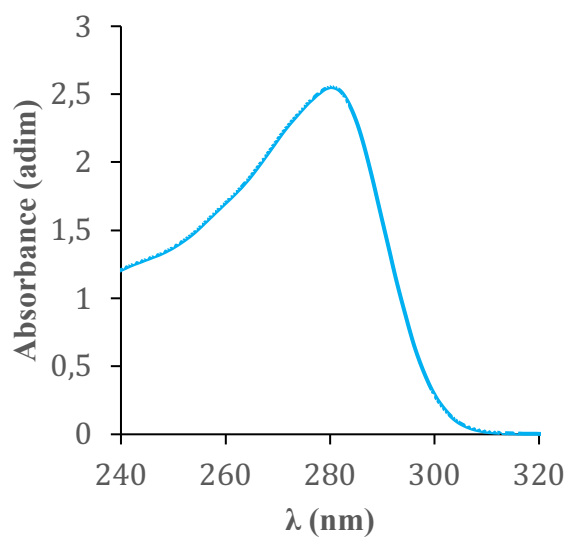

**Figure S55.** UV-Visible spectra of **6**.

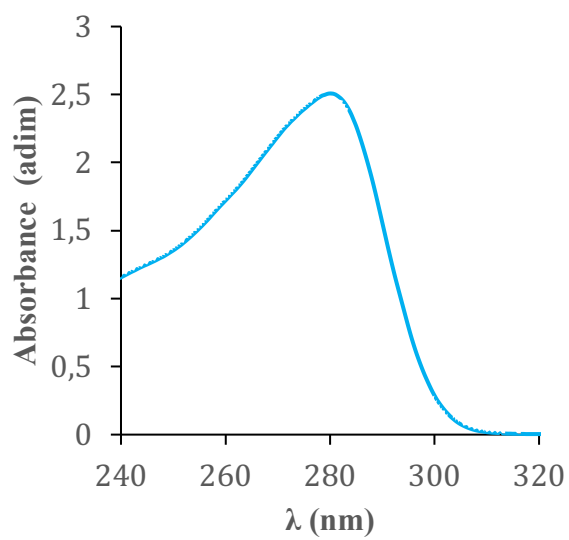

**Figure S56.** UV-Visible spectra of **7**

**Emission Decay Profiles in dichloromethane solution (excitation LED 280 nm).**

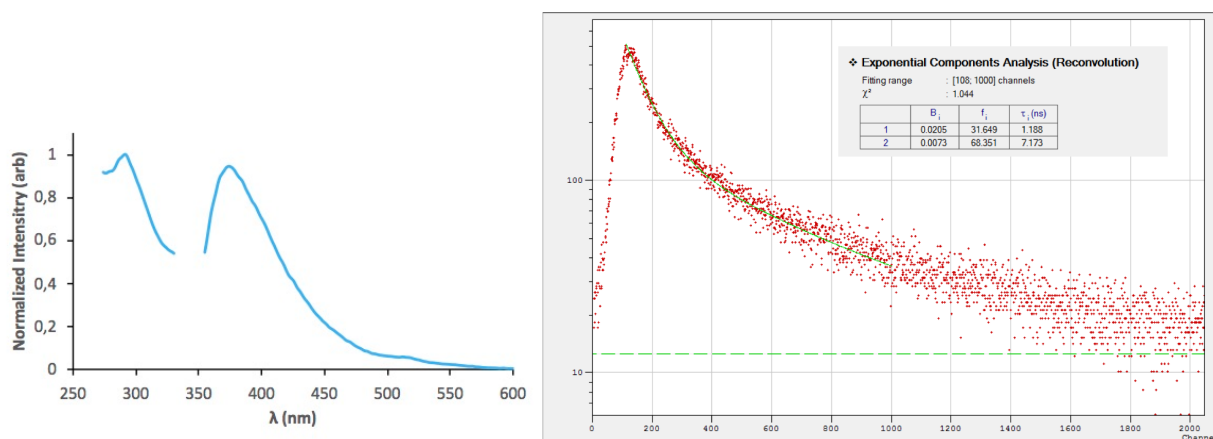

**Figure S57.** Luminescence spectra and emission decay profile of CN6 ( $\text{CH}_2\text{Cl}_2$ ).

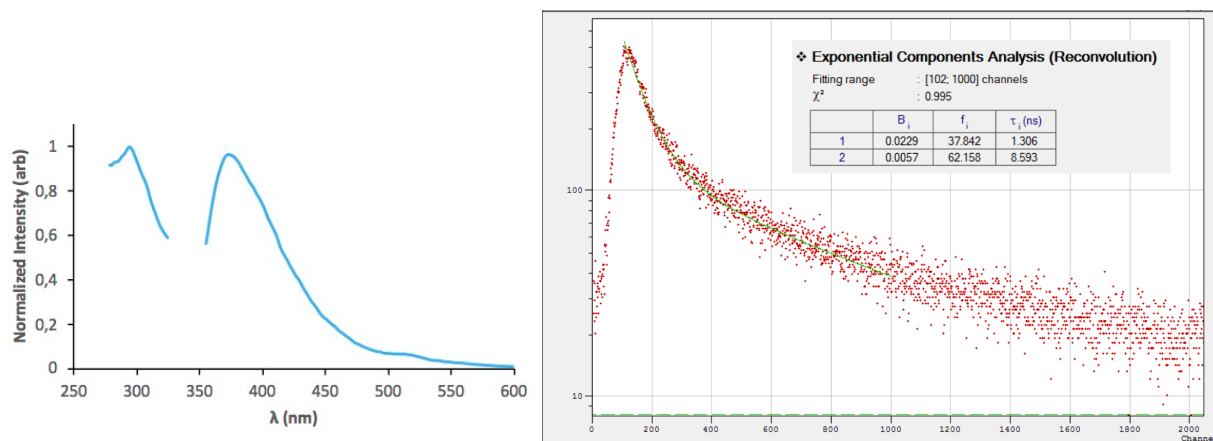

**Figure S58.** Luminescence spectra and emission decay profile of CN8 ( $\text{CH}_2\text{Cl}_2$ ).

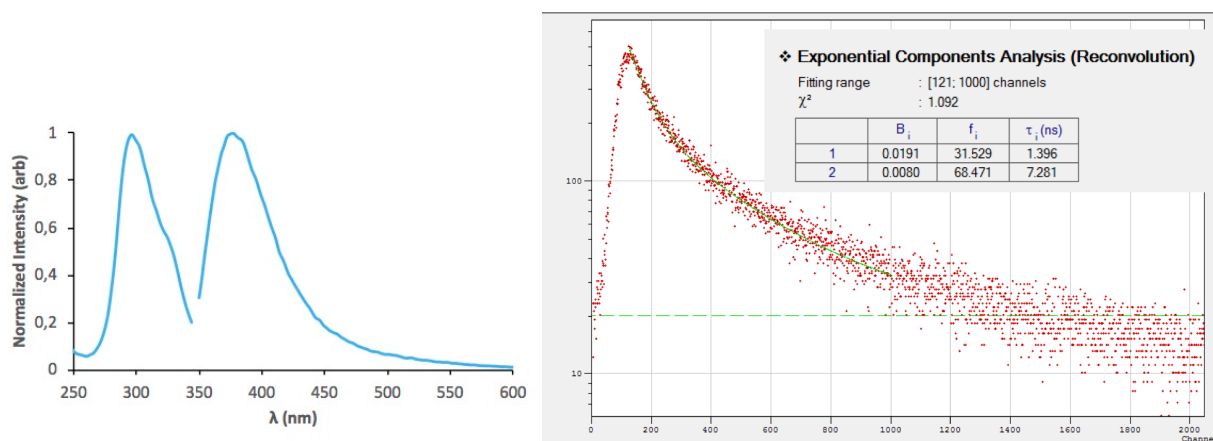

**Figure S59.** Luminescence spectra and emission decay profile of CN10 ( $\text{CH}_2\text{Cl}_2$ ).

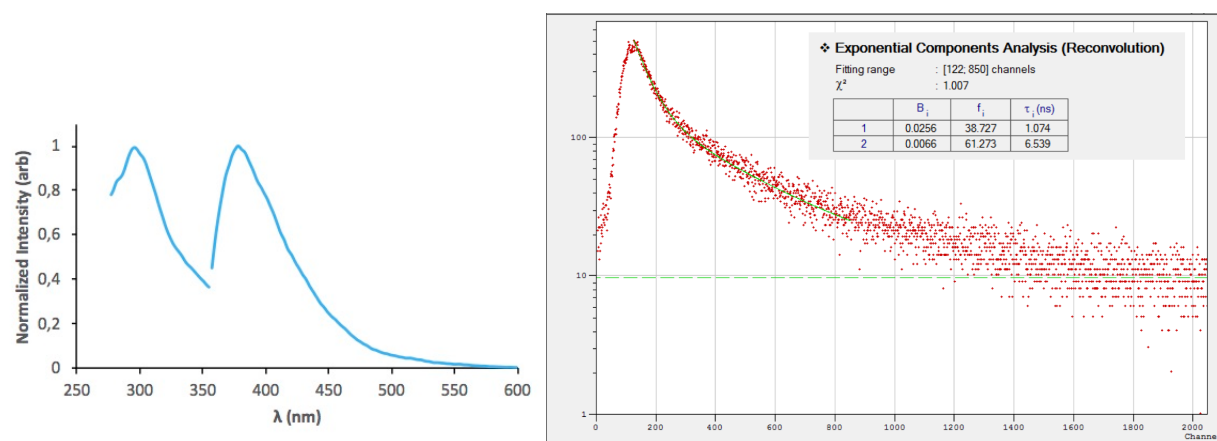

**Figure S60.** Luminescence spectra and emission decay profile of **CN8\*** ( $\text{CH}_2\text{Cl}_2$ ).

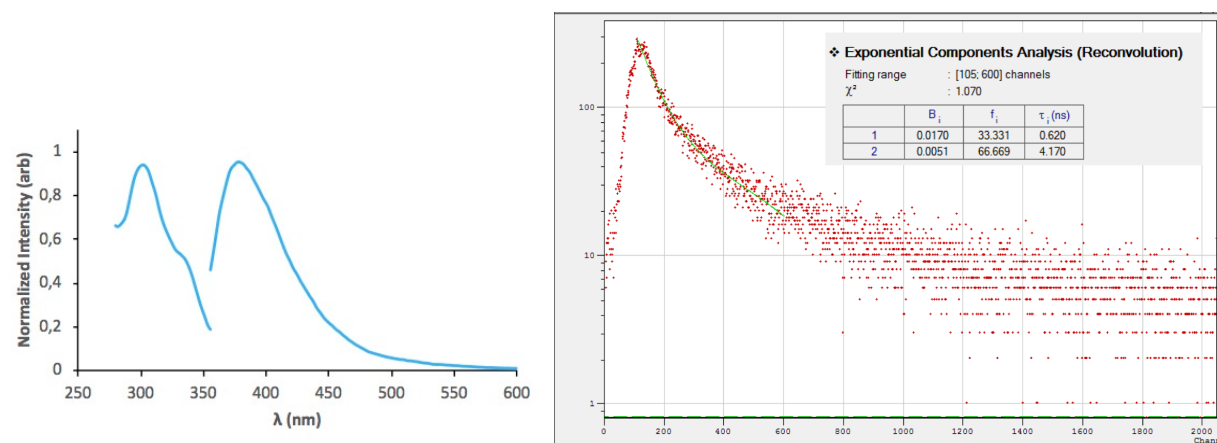

**Figure S61.** Luminescence spectra and emission decay profile of **1** ( $\text{CH}_2\text{Cl}_2$ ).

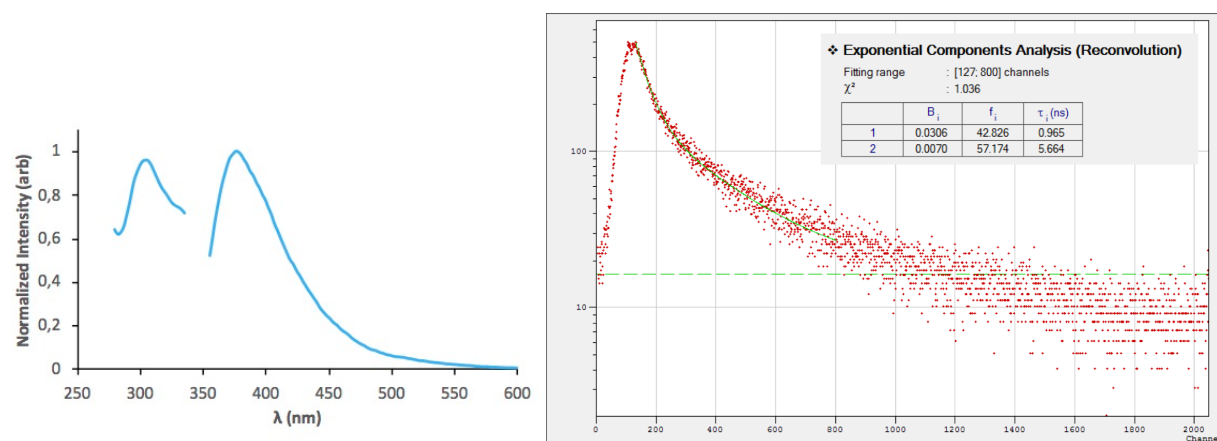

**Figure S62.** Luminescence spectra and emission decay profile of **2** ( $\text{CH}_2\text{Cl}_2$ ).

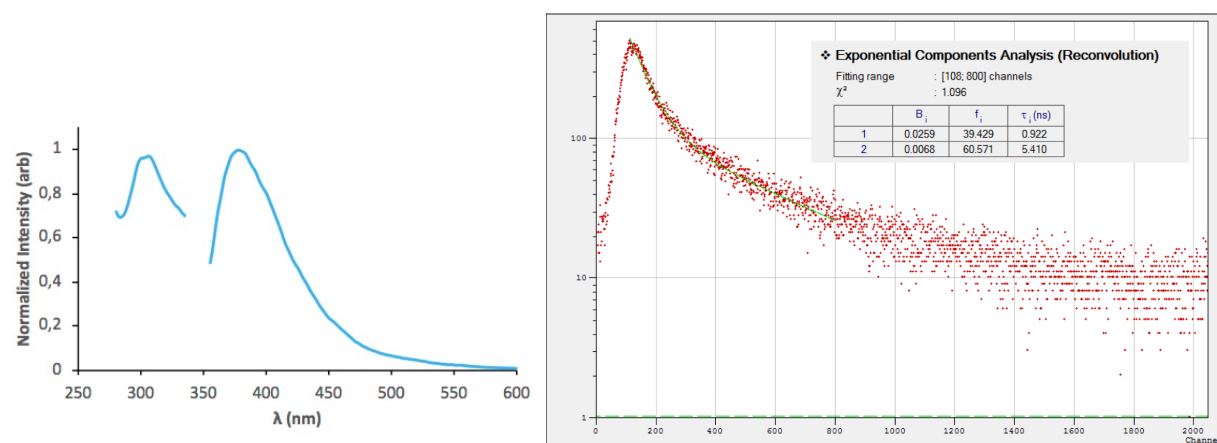

**Figure S63.** Luminescence spectra and emission decay profile of **3** ( $\text{CH}_2\text{Cl}_2$ ).

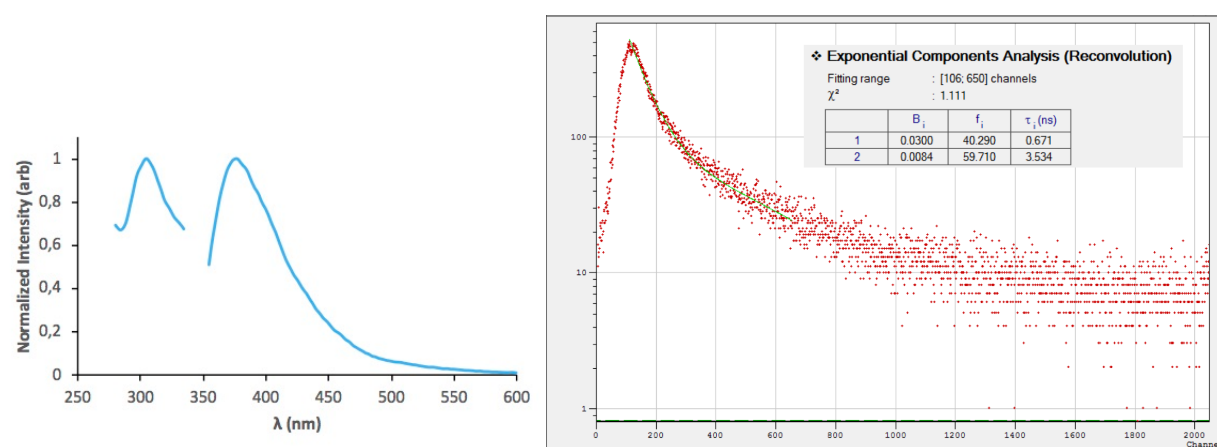

**Figure S64.** Luminescence spectra and emission decay profile of **4** ( $\text{CH}_2\text{Cl}_2$ ).

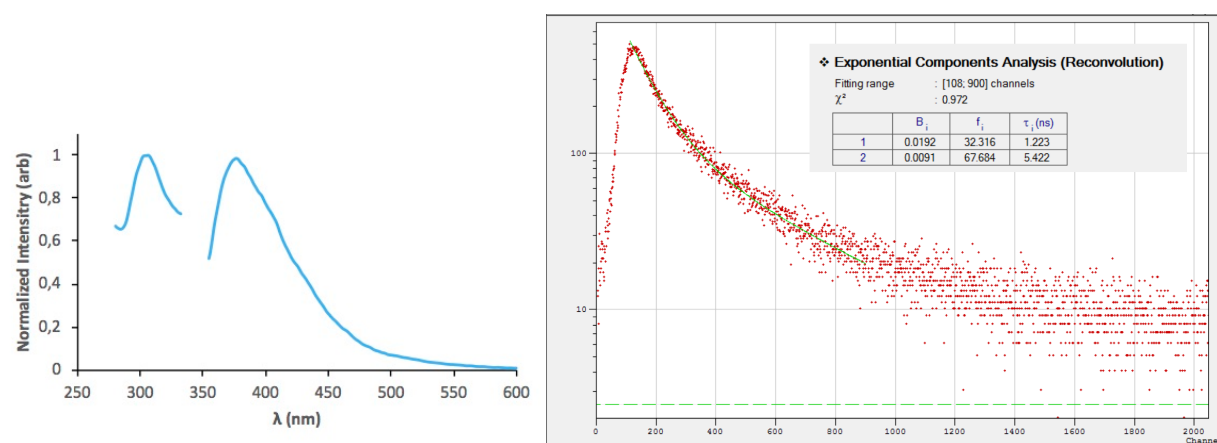

**Figure S65.** Luminescence spectra and emission decay profile of **5** ( $\text{CH}_2\text{Cl}_2$ ).

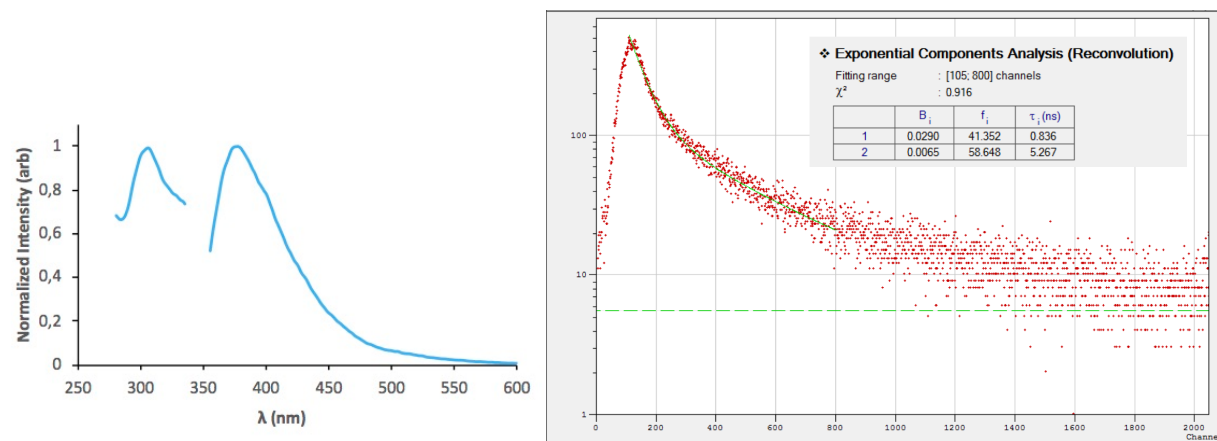

**Figure S66.** Luminescence spectra and emission decay profile of **6** ( $\text{CH}_2\text{Cl}_2$ ).

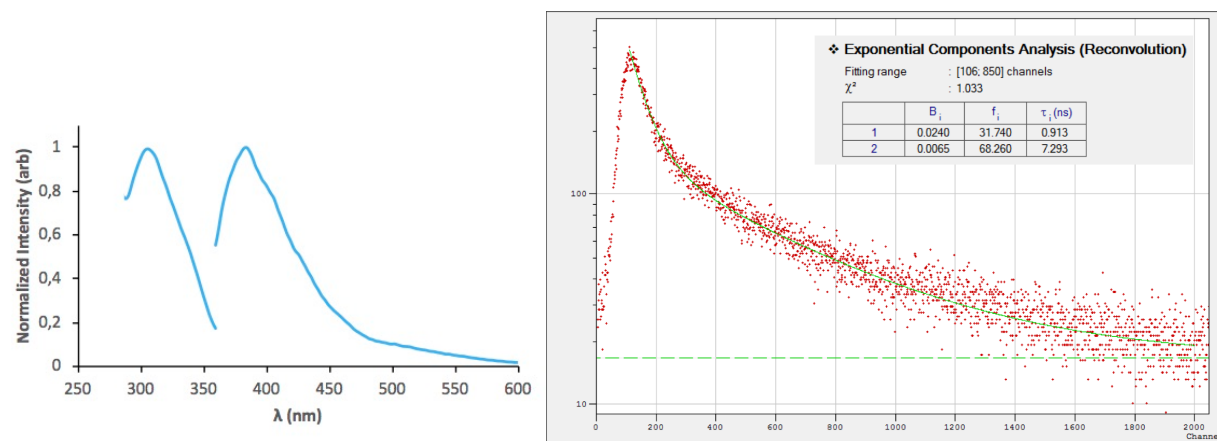

**Figure S67.** Luminescence spectra and emission decay profile of **7** ( $\text{CH}_2\text{Cl}_2$ ).

## Excitation and emission data at different temperatures

**Table S2.** Luminescence data for the gold complexes (**4-7**) in the mesomorphic states.

| Compound <sup>a</sup> | SmC*                       |                            |                      |                      | SmA                        |                            |                      |                      |
|-----------------------|----------------------------|----------------------------|----------------------|----------------------|----------------------------|----------------------------|----------------------|----------------------|
|                       | $\lambda_{\text{max, ex}}$ | $\lambda_{\text{max, em}}$ | $\tau/(\mu\text{s})$ | $T^a/^\circ\text{C}$ | $\lambda_{\text{max, ex}}$ | $\lambda_{\text{max, em}}$ | $\tau/(\mu\text{s})$ | $T^a/^\circ\text{C}$ |
| <b>4</b>              | -                          | -                          | -                    |                      | 329                        | 536                        | 0.08                 | 95                   |
| <b>5</b>              | 330                        | 536                        | 0.13                 | 85                   | 330                        | 533                        | 0.04                 | 115                  |
| <b>6</b>              | 329                        | 531                        | 0.15                 | 80                   | 322                        | 526                        | 0.05                 | 115                  |
| <b>7</b>              | -                          | -                          | -                    |                      | 330                        | 529                        | 0.26                 | 66                   |

$\lambda$ : nm.

## Excitation and emission spectra at different temperatures

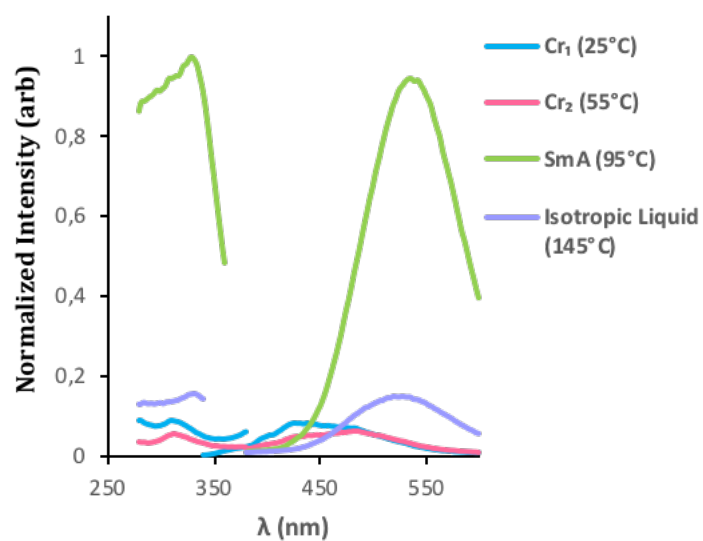

**Figure S68.** Excitation and emission spectra ( $\lambda_{\text{exc}} = 329 \text{ nm}$ ) of **4**.

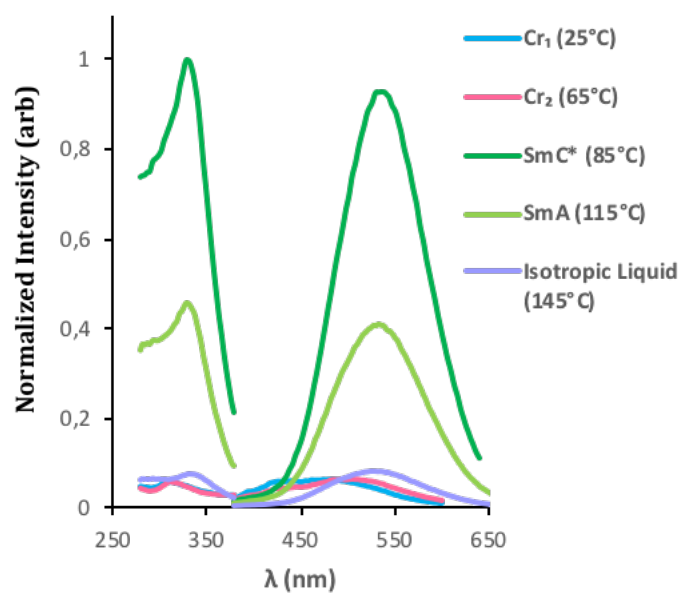

**Figure S69.** Excitation and emission spectra ( $\lambda_{\text{exc}} = 330 \text{ nm}$ ) of **5**.

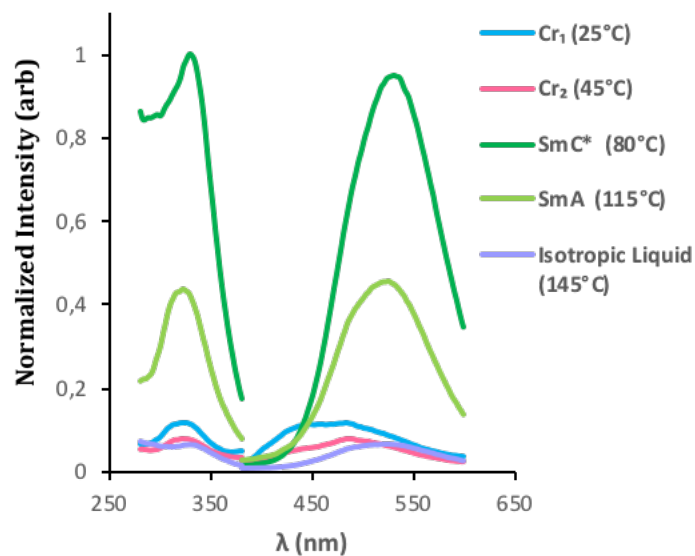

**Figure S70.** Excitation and emission spectra (SmC\*:  $\lambda_{\text{exc}} = 329 \text{ nm}$ , SmA:  $\lambda_{\text{exc}} = 322 \text{ nm}$ ) of **6**.

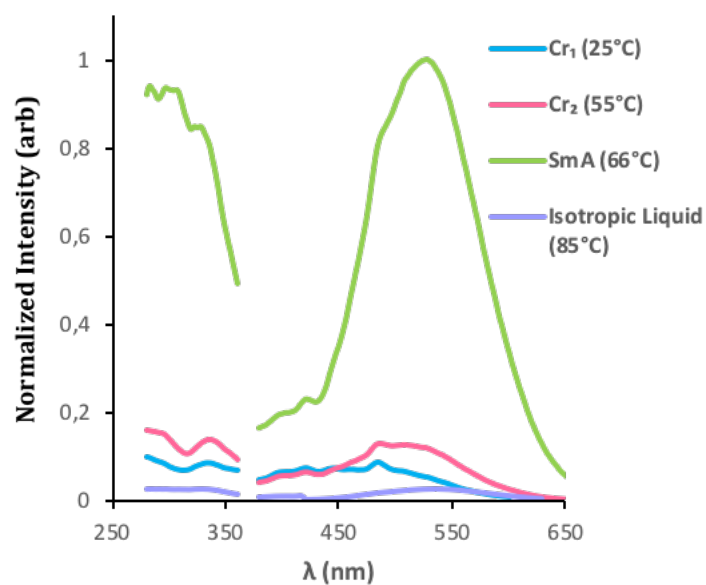

**Figure S71.** Excitation and emission spectra ( $\lambda_{\text{exc}} = 330 \text{ nm}$ ) of **7**.

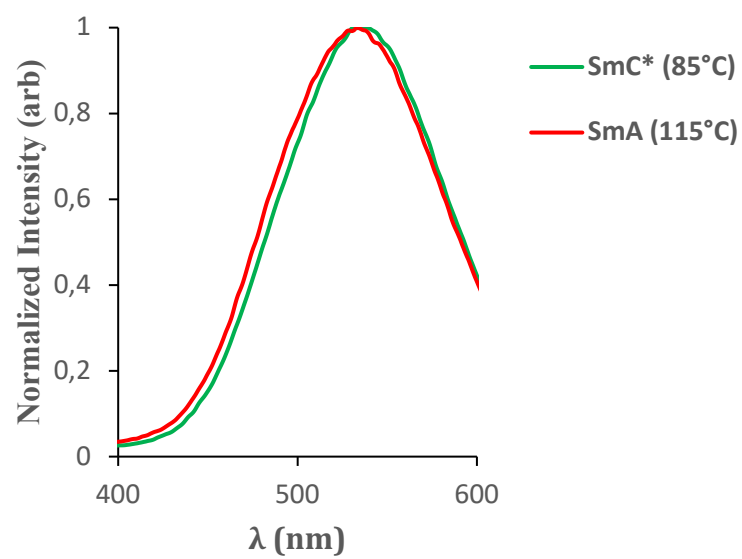

**Figure S72.** Emission spectra ( $\lambda_{\text{exc}} = 330 \text{ nm}$ ) of **5** among the different mesophases.

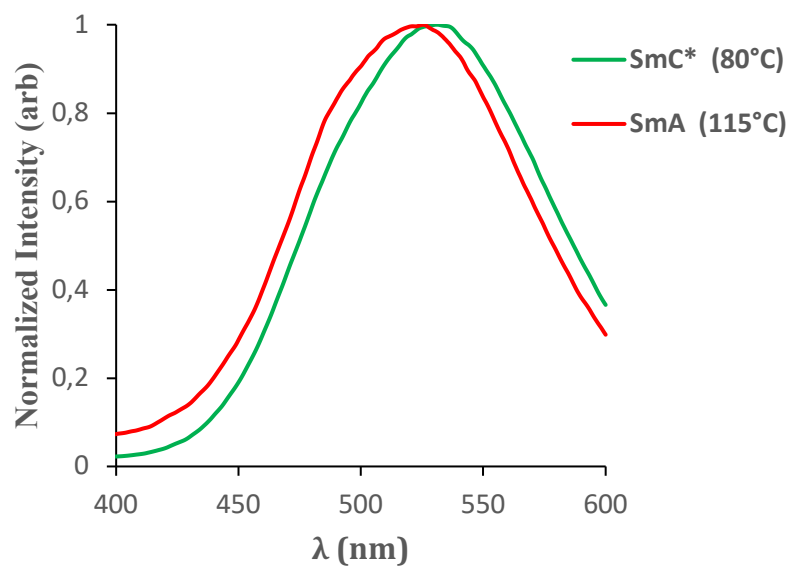

**Figure S73.** Emission spectra (SmC\*:  $\lambda_{\text{exc}} = 329$  nm, SmA:  $\lambda_{\text{exc}} = 322$  nm) of **6** among the different mesophases.

**Emission Decay Profiles in mesophase** (excitation LED 375 nm).

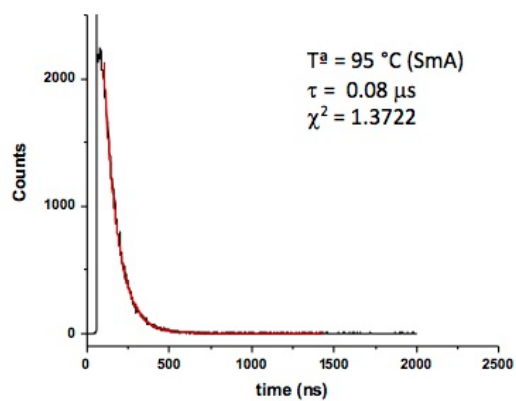

**Figure S74.** Emission decay profile of **4** in the SmA mesophase at 95 °C.

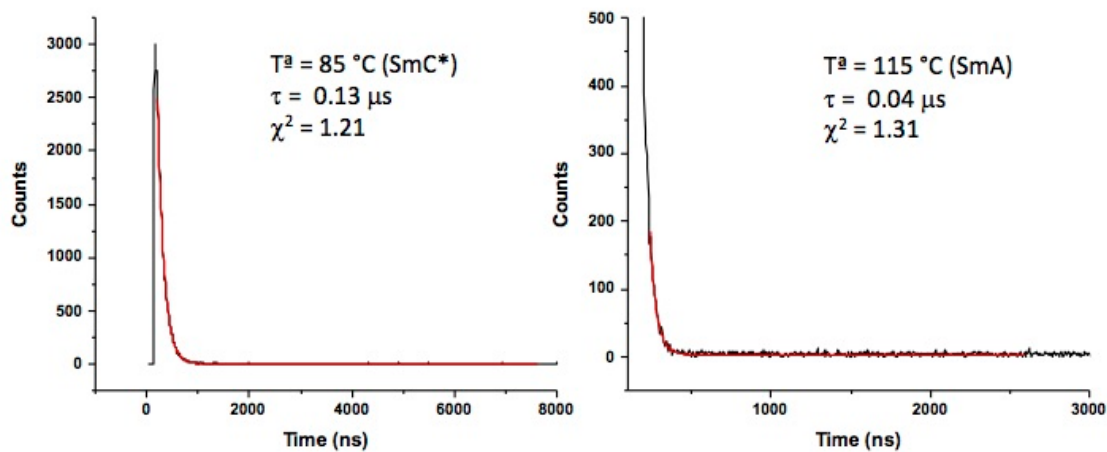

**Figure S75.** Emission decay profile of **5** in the mesophases: a) SmC\* at 85 °C, b) SmA at 115 °C.

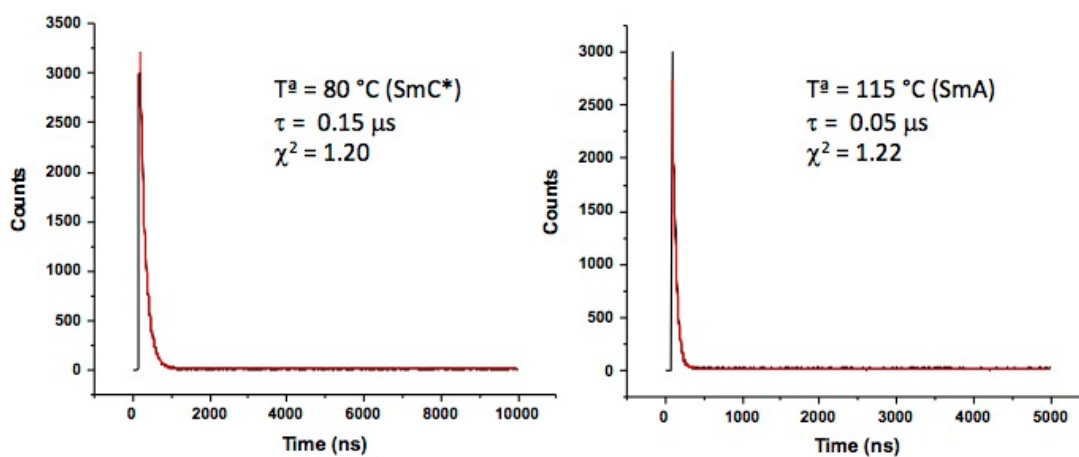

**Figure S76.** Emission decay profile of **6** in the mesophases: a) SmC\* at 80 °C, b) SmA at 115 °C.

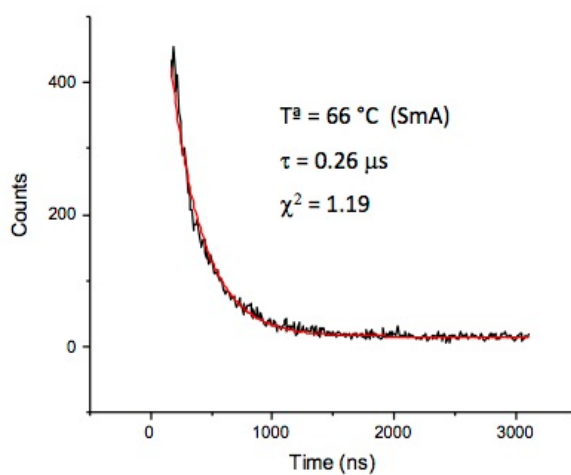

**Figure S77.** Emission Decay Profile of **7** in the SmA mesophase at 66 °C.

### X-ray diffraction diagrams

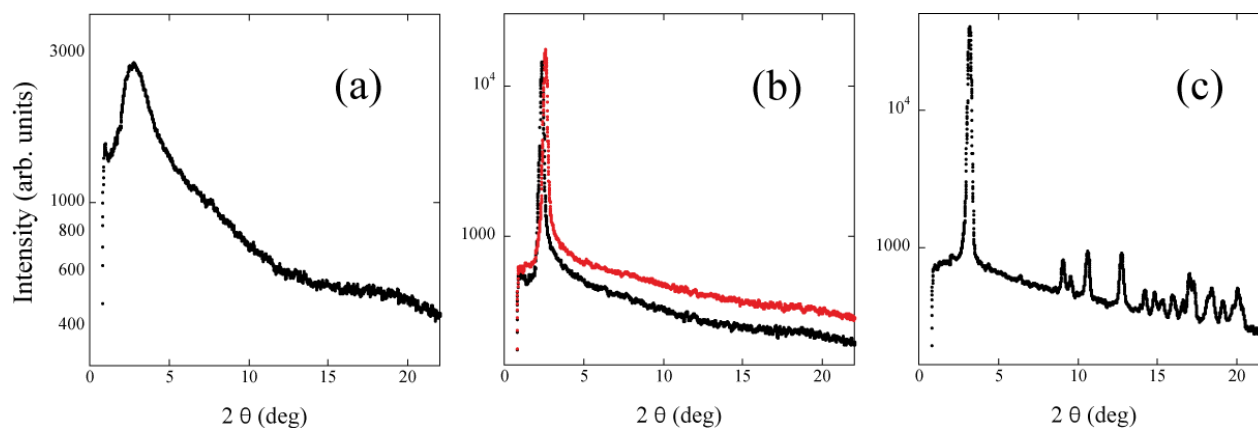

**Figure S78.** X-ray diffraction patterns of compound **2**. (a) Isotropic phase. (b) Interdigitated SmA (black) and SmC\* (red). (c) Crystal.

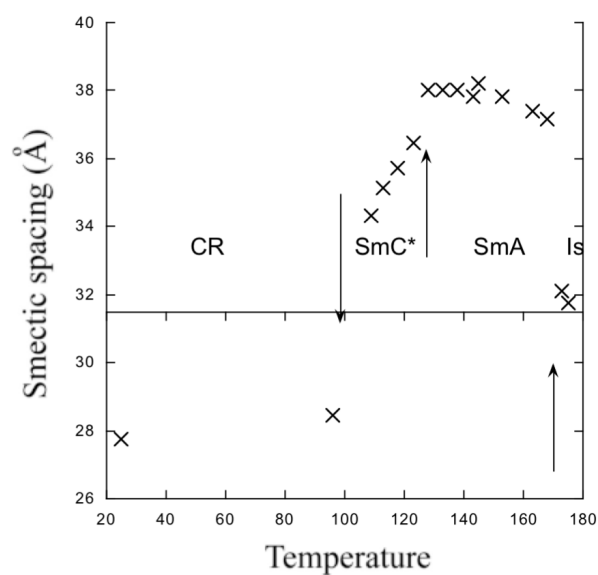

**Figure S79.** Smectic spacing vs temperature for compound **2**. The transitions between the different phases are marked with arrows.

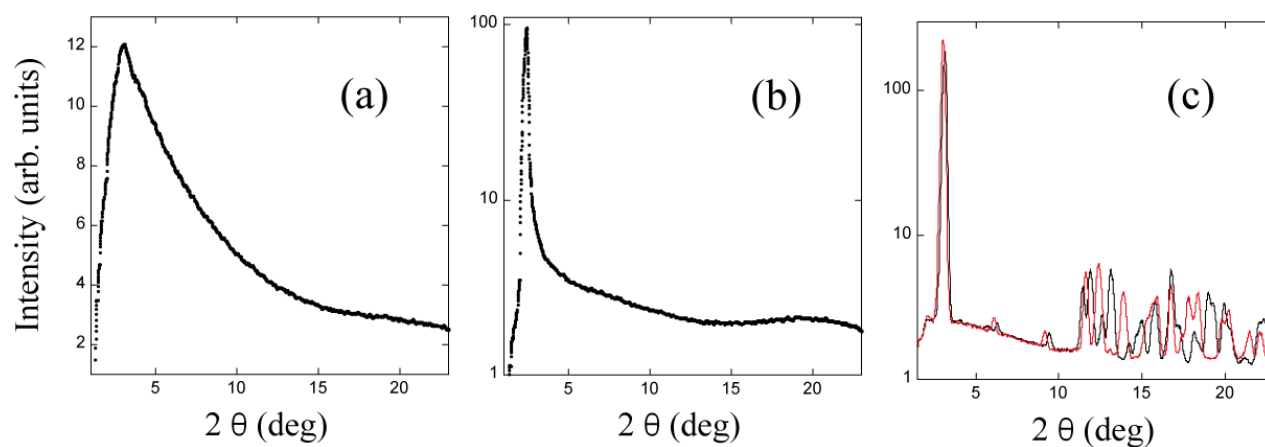

**Figure S80.** X-ray diffraction patterns of compound **5**. (a) in the isotropic phase. (b) in the interdigitated smectic A phase, where the layer spacing is 35 Å. (c) at 25 °C in the Cr<sub>2</sub> phase, just after cooling (red line), and in the Cr<sub>1</sub> phase after relaxing for a few hours (black line).

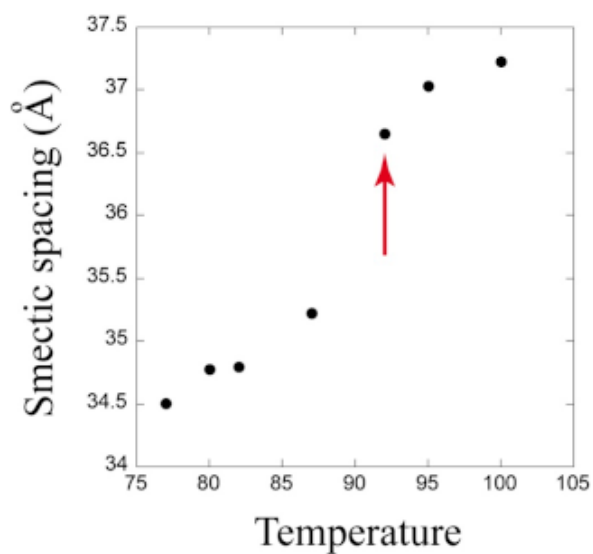

**Figure S81.** Smectic spacing vs temperature for compound **5**. A transition to a tilted SmC\* phase occurs at 92 °C on cooling (red arrow).

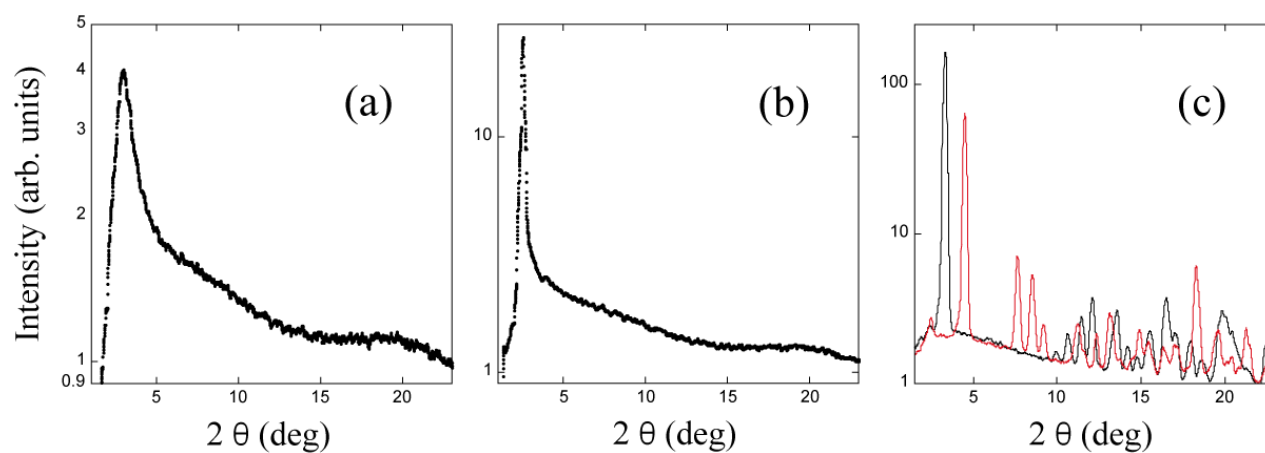

**Figure S82.** X-ray diffraction patterns of compound **7**. (a) in the isotropic phase. (b) in the interdigitated smectic A phase, where the layer spacing is 35 Å. (c) at 25 °C in the Cr<sub>2</sub> phase, just after cooling (red line), and in the Cr<sub>1</sub> phase after relaxing for a few hours (black line).

## References

- <sup>1</sup> S. Coco, C. Fernández-Mayordomo, S. Falagán, P. Espinet, *Inorganica Chim. Acta.*, 2003, **350**, 366.
- <sup>2</sup> T. Kaharu, T. Tanaka, M. Sawada, S. Takahashi, *J. Mater. Chem.* 1994, **4**, 859.
- <sup>3</sup> R. Usón, A. Laguna, J. Vicente, *J. Organomet. Chem.* 1977, **131**, 471.
- <sup>4</sup> R. Bayón, S. Coco, P. Espinet, *Chem. Mater.* 2002, **14**, 3515.
- <sup>5</sup> Mitsunobu, O. *Synthesis* 1981, 1.
